# Supplementary material for: Examination of patient characteristics and hydroxychloroquine use based on the US Food and Drug Administration’s recommendation: a cross-sectional analysis in New York
Source: PubMed Central journal article supplement — BMJ Open. 2021 Feb 8;11(2):e042965. doi: 10.1136/bmjopen-2020-042965 (PMC7871686; doi:10.1136/bmjopen-2020-042965), 2021-02-08
Supplement: bmjopen-2020-042965.draft_revisions.pdf [file bmjopen-2020-042965.draft_revisions.pdf]

# BMJ Open

BMJ Open is committed to open peer review. As part of this commitment we make the peer review history of every article we publish publicly available.

When an article is published we post the peer reviewers' comments and the authors' responses online. We also post the versions of the paper that were used during peer review. These are the versions that the peer review comments apply to.

The versions of the paper that follow are the versions that were submitted during the peer review process. They are not the versions of record or the final published versions. They should not be cited or distributed as the published version of this manuscript.

BMJ Open is an open access journal and the full, final, typeset and author-corrected version of record of the manuscript is available on our site with no access controls, subscription charges or pay-per-view fees (<http://bmjopen.bmj.com>).

If you have any questions on BMJ Open's open peer review process please email [info.bmjopen@bmj.com](mailto:info.bmjopen@bmj.com)

# BMJ Open

## Examination of Changes in Patient Characteristics and Hydroxychloroquine use based on U.S. Food and Drug Administration's Recommendation

|                               |                                                                                                                                                                                                                                                                                                                                                                                                                                                                                                                                                                                                                                                                                                                                                                                                                                                                                                                                                                              |
|-------------------------------|------------------------------------------------------------------------------------------------------------------------------------------------------------------------------------------------------------------------------------------------------------------------------------------------------------------------------------------------------------------------------------------------------------------------------------------------------------------------------------------------------------------------------------------------------------------------------------------------------------------------------------------------------------------------------------------------------------------------------------------------------------------------------------------------------------------------------------------------------------------------------------------------------------------------------------------------------------------------------|
| Journal:                      | <i>BMJ Open</i>                                                                                                                                                                                                                                                                                                                                                                                                                                                                                                                                                                                                                                                                                                                                                                                                                                                                                                                                                              |
| Manuscript ID                 | bmjopen-2020-042965                                                                                                                                                                                                                                                                                                                                                                                                                                                                                                                                                                                                                                                                                                                                                                                                                                                                                                                                                          |
| Article Type:                 | Original research                                                                                                                                                                                                                                                                                                                                                                                                                                                                                                                                                                                                                                                                                                                                                                                                                                                                                                                                                            |
| Date Submitted by the Author: | 23-Jul-2020                                                                                                                                                                                                                                                                                                                                                                                                                                                                                                                                                                                                                                                                                                                                                                                                                                                                                                                                                                  |
| Complete List of Authors:     | Kim, Eun Ji; Donald and Barbara Zucker School of Medicine at Hofstra/Northwell; Northwell Health Feinstein Institutes for Medical Research,<br>Coppa, Kevin; Northwell Health<br>Hirsch, Jamie; Donald and Barbara Zucker School of Medicine at Hofstra/Northwell; Northwell Health Feinstein Institutes for Medical Research,<br>Abrahams, Sara; Donald and Barbara Zucker School of Medicine at Hofstra/Northwell<br>Johnson, Jennifer; Northwell Health Feinstein Institutes for Medical Research,<br>Lesser, Martin; Northwell Health Feinstein Institutes for Medical Research, Biostatistics; Donald and Barbara Zucker School of Medicine at Hofstra/Northwell<br>Davidson, Karina W.; Feinstein Institute for Medical Research, Research;<br>Donald and Barbara Zucker School of Medicine at Hofstra/Northwell<br>Conigliaro, Joseph; Donald and Barbara Zucker School of Medicine at Hofstra/Northwell; Northwell Health Feinstein Institutes for Medical Research, |
| Keywords:                     | COVID-19, Public health < INFECTIOUS DISEASES, Epidemiology < INFECTIOUS DISEASES                                                                                                                                                                                                                                                                                                                                                                                                                                                                                                                                                                                                                                                                                                                                                                                                                                                                                            |
|                               |                                                                                                                                                                                                                                                                                                                                                                                                                                                                                                                                                                                                                                                                                                                                                                                                                                                                                                                                                                              |

SCHOLARONE™  
Manuscripts

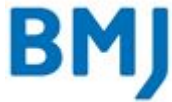

I, the Submitting Author has the right to grant and does grant on behalf of all authors of the Work (as defined in the below author licence), an exclusive licence and/or a non-exclusive licence for contributions from authors who are: i) UK Crown employees; ii) where BMJ has agreed a CC-BY licence shall apply, and/or iii) in accordance with the terms applicable for US Federal Government officers or employees acting as part of their official duties; on a worldwide, perpetual, irrevocable, royalty-free basis to BMJ Publishing Group Ltd ("BMJ") its licensees and where the relevant Journal is co-owned by BMJ to the co-owners of the Journal, to publish the Work in this journal and any other BMJ products and to exploit all rights, as set out in our [licence](#).

The Submitting Author accepts and understands that any supply made under these terms is made by BMJ to the Submitting Author unless you are acting as an employee on behalf of your employer or a postgraduate student of an affiliated institution which is paying any applicable article publishing charge ("APC") for Open Access articles. Where the Submitting Author wishes to make the Work available on an Open Access basis (and intends to pay the relevant APC), the terms of reuse of such Open Access shall be governed by a Creative Commons licence – details of these licences and which [Creative Commons](#) licence will apply to this Work are set out in our licence referred to above.

Other than as permitted in any relevant BMJ Author's Self Archiving Policies, I confirm this Work has not been accepted for publication elsewhere, is not being considered for publication elsewhere and does not duplicate material already published. I confirm all authors consent to publication of this Work and authorise the granting of this licence.

1  
2  
3 **Title: Examination of Changes in Patient Characteristics and Hydroxychloroquine use**  
4 **based on U.S. Food and Drug Administration's Recommendation**  
5

6 Eun Ji Kim, MD, MS, MS<sup>1,2</sup>  
7 Kevin Coppa, BS<sup>3</sup>  
8 Jamie S. Hirsch, MD, MA, MSB<sup>1,2,3</sup>  
9 Sara Abrahams, BS<sup>2</sup>  
10 Jennifer C. Johnson MS, MA<sup>1</sup>  
11 Martin Lesser PhD<sup>1,2</sup>  
12 Karina W. Davidson, PhD, MASc<sup>1,2</sup>  
13 Joseph Conigliaro, MD, MPH<sup>1,2</sup>  
14  
15

16  
17 The Northwell COVID-19 Research Consortium: Stuart L. Cohen, MD<sup>1,2</sup>; Charlotte  
18 Kvasnovsky, MD, PhD, MPH<sup>2</sup>; Stephen C. Machnicki, MD FCCP<sup>2</sup>; Alex Makhnevich MD<sup>1,2</sup>;  
19 Prashant Malhotra, MD<sup>1,2</sup>; Lyndonna Marrast, MD, MPH<sup>1,2</sup>; Ramanak Mitra, MD<sup>2</sup>; Ernesto P.  
20 Molmenti, MD<sup>2</sup>; Sonali Narain, MBBS, MPH<sup>1,2</sup>; M. Wasif Saif MD, MBBS<sup>1,2</sup>; Sanjaya  
21 Satapathy, MD<sup>2</sup>; Shalin Shah, MD<sup>2</sup>  
22  
23

24 <sup>1</sup> Institute of Health Innovations and Outcome Research, Feinstein Institutes for Medical  
25 Research, Northwell Health, Manhasset, New York

26 <sup>2</sup> Donald and Barbara Zucker School of Medicine at Hofstra/Northwell, Northwell Health,  
27 Hempstead, New York

28 <sup>3</sup> Department of Information Services, Northwell Health, New Hyde Park, New York  
29  
30  
31

32 Concept and design: EK, KC, JH, KD, ML, JC, SC, SM, AM, PM, LM, RM, EM, SN, WS, SS

33 Acquisition: KC, JH

34 Drafting of the manuscript: EK, KC, JC, SA

35 Critical revision of the manuscript for important intellectual content: all authors

36 Statistical analysis: KC, ML, CK

37 Obtained funding: KD

38 Administrative, technical or material support: KD, JC

39 Supervision: EK, ML, KD, JH, JC  
40  
41  
42  
43  
44

45 Corresponding author: Joseph Conigliaro, MD, MPH  
46 2001 Marcus Avenue S160  
47 Lake Success, NY 11042  
48 jconigliaro@northwell.edu  
49

50 2,658 words

51 5 tables/figure  
52  
53  
54  
55  
56  
57  
58  
59  
60

**Abstract (299/300 words)**

**Objective:** To examine the association between hydroxychloroquine use and clinical outcomes arising from changes in the U.S. Food and Drug Administration (FDA)'s recommendation and changes in patient characteristics in each period.

**Design:** A retrospective cross-sectional analysis.

**Setting and Participants:** We included hospitalized adult patients with confirmed COVID-19 infections from 12 Northwell Health acute care hospitals between March 1, 2020 and May 11, 2020. We categorized changes in the FDA recommendation as pre-FDA approval (March 1, 2020-March 27, 2020), FDA approval (March 28, 2020-April 23, 2020), and FDA warning (April 24, 2020-May 11, 2020). The hydroxychloroquine treated group received at least one dose within 48 hours of hospital admission.

**Primary outcome:** A composite of intubation and inpatient death.

**Results:** The percentages of patients who were treated with hydroxychloroquine were 192/2202 (8.7%) pre-FDA approval, 2902/6741 (43.0%) FDA approval, and 176 (16.5%) FDA warning period (p-value<0.001). Using propensity score-matching, there was a higher rate of the composite outcome among patients treated with hydroxychloroquine (49/192, 25.5%) compared to no hydroxychloroquine (66/384, 17.2%) in the pre-FDA approval period (p-value=0.03) but not in the FDA-approval period (25.5% vs 22.6%, p=0.08) or the FDA warning (21.0% vs 15.1%, p=0.11) periods. Coincidentally, there was an increase in number of COVID-19 patients and disease severity during the FDA approval period (24.1% during FDA approval versus 21.4% during pre-FDA approval period). Hydroxychloroquine use was associated with increased odds of the composite outcome during the pre-FDA approval period (OR=1.65 [1.09-2.51]) but not

1  
2  
3 during the FDA approval (OR=1.17 [0.99-1.39]) and FDA warning (OR=1.50 [0.94-2.39])  
4  
5 periods.  
6

7 **Conclusions:** There were concurrent changes in percentage of COVID-19 patients treated with  
8 hydroxychloroquine and the number (and disease severity) of hospitalized patients with COVID-  
9  
10 19 infections. Adverse clinical outcomes were significantly associated with hydroxychloroquine  
11  
12 use only during pre-FDA approval period but not during FDA-approval and warning periods.  
13  
14  
15  
16  
17  
18  
19  
20  
21  
22  
23  
24  
25  
26  
27  
28  
29  
30  
31  
32  
33  
34  
35  
36  
37  
38  
39  
40  
41  
42  
43  
44  
45  
46  
47  
48  
49  
50  
51  
52  
53  
54  
55  
56  
57  
58  
59  
60

## Article Summary

- The percentages of patients who were treated with hydroxychloroquine were 192/2202 (8.7%) pre-FDA approval, 2902/6741 (43.0%) FDA approval, and 176 (16.5%) FDA warning period (p-value<0.001).
- Using propensity score-matching, there was a higher rate of the composite outcome of intubation and inpatient mortality among patients treated with hydroxychloroquine compared to no hydroxychloroquine in the pre-FDA approval period but not in the FDA-approval period or the FDA warning periods.
- Hydroxychloroquine use was associated with increased odds of the composite outcome during the pre-FDA approval period but not during the FDA approval and FDA warning periods.

review only

## Introduction

Coronavirus Disease 2019 (COVID-19), which causes severe acute respiratory syndrome, has spread globally. One consequence has been the unprecedented number of intensive care unit (ICU) admissions requiring mechanical ventilation. The mortality of patients on mechanical ventilation has been reported to be 60-80% with an overall hospital mortality of 20-25%.<sup>1,2</sup> As of June 10, 2020, over 7.3 million people have been infected with COVID-19 and 410,000 deaths have been reported globally.<sup>3</sup> Although multiple vaccines are in preparation or have begun clinical testing, data on safety and efficacy required to immunize the general public is currently unavailable and may be months to years away. Therefore, the need to identify medications that are associated with slowed COVID-19 progression or decreased mortality remains urgent.

Hydroxychloroquine, a medication commonly used to prevent malaria infection and treat autoimmune diseases, has been found to be effective in treating COVID-19 *in vitro*.<sup>4-9</sup> Hydroxychloroquine is found to reduce the entry of coronavirus into a cell through interference with the terminal glycosylation of angiotensin-converting enzyme 2 receptor, which inhibits viral replication.<sup>4,6</sup> Additionally, hydroxychloroquine has immunomodulatory activity, and may inhibit cytokine production and prevent the occurrence of cytokine storm.<sup>10</sup> Early evidence suggests that hydroxychloroquine can serve as a potential treatment for COVID-19.<sup>11-13</sup> However, recent studies examining treatment of COVID-19 with hydroxychloroquine showed mixed results, with some studies showing no average benefit in outcomes, including intubation or inpatient mortality, but other studies showed worse outcomes.<sup>14-18</sup>

However, no study has accounted for how changes in recommendations for hydroxychloroquine by the United States Food and Drug Administration (FDA) affected outcomes of patients treated for COVID-19. On March 28, 2020, the FDA issued an Emergency



1  
2  
3 Use Authorization for hydroxychloroquine in the treatment of COVID-19 infection. During this  
4  
5 time, there was also an increased number of hospitalized patients with COVID-19, which may  
6  
7 have resulted in changes in hospital capacity and disease severity.<sup>3</sup> Subsequently, on April 24,  
8  
9 2020, the FDA cautioned against using hydroxychloroquine for COVID-19 infection.<sup>19</sup> These  
10  
11 changes in the recommendation of hydroxychloroquine as a treatment for COVID-19 infection  
12  
13 may have impacted whether patients were treated with hydroxychloroquine for COVID-19.  
14  
15 These two events occurring concurrently could affect the association of hydroxychloroquine with  
16  
17 COVID-19 outcomes. Therefore, we used data from one of the largest healthcare systems in the  
18  
19 United States and examined the association between hydroxychloroquine use and patients'  
20  
21 clinical outcomes based on changes in FDA recommendation.  
22  
23  
24  
25  
26  
27

## 28 **Methods**

### 29 *Setting*

30  
31  
32 We used data from Northwell Health, the largest academic healthcare system in New  
33  
34 York. Northwell Health serves approximately 11 million patients throughout Long Island, New  
35  
36 York City, and Westchester County and has 23 affiliated healthcare facilities, including 12 acute  
37  
38 care hospitals. The Institutional Review Board for the Feinstein Institutes for Medical Research  
39  
40 at Northwell Health approved this case series as minimal-risk research using data collected for  
41  
42 routine clinical practice and waived the requirement for informed consent.  
43  
44  
45  
46  
47  
48

### 49 *Data Source*

1  
2  
3 Data for this study was obtained from the enterprise's inpatient electronic health record  
4 (EHR; Sunrise Clinical Manager, Allscripts, Chicago, IL), which covers 12 of Northwell  
5  
6 Health's hospitals.  
7  
8  
9

### 10 11 12 *Study Population* 13

14  
15 The study population included all adult patients (n=13,258), aged 18 years and older,  
16 hospitalized at one of Northwell Health's 12 acute care hospitals between March 1, 2020 and  
17 May 11, 2020 with a diagnosis of COVID-19 confirmed by a positive result on polymerase chain  
18 reaction testing of a nasopharyngeal sample. For patients with multiple COVID-19 tests, they  
19 were considered to have a confirmed COVID-19 infection if any of the repeated tests within the  
20 same hospitalization returned positive. We excluded patients who died or were intubated within  
21 one day of hospitalization because their clinical outcomes were likely predetermined by pre-  
22 hospitalization factors. We also excluded patients who were discharged within one day of  
23 admission. Patients who were admitted to the obstetrics service were excluded as all obstetrics  
24 patients were screened for COVID-19 on their admission. For patients with multiple  
25 hospitalizations for COVID-19, we used their first hospitalization with a confirmed diagnosis of  
26 COVID-19. We excluded 3,249 patients who did not meet the inclusion and exclusion criteria.  
27  
28  
29  
30  
31  
32  
33  
34  
35  
36  
37  
38  
39  
40  
41  
42  
43

### 44 45 *Exposure* 46

47 Patients were identified as treated with hydroxychloroquine if they received at least one  
48 dose within 48 hours of admission. The control group for this analysis consisted of patients who  
49 were not treated with hydroxychloroquine within 48 hours of admission. Patients who did not  
50 initially receive hydroxychloroquine within 48 hours but received the medication later in their  
51  
52  
53  
54  
55  
56  
57  
58  
59  
60

1  
2  
3 hospitalization were kept in the control group. We excluded COVID-19 patients who were  
4 treated with azithromycin or a combination of hydroxychloroquine and azithromycin. We also  
5 excluded patients who were intubated prior to getting their first dose of hydroxychloroquine  
6 within 48 hours of admission.  
7  
8  
9  
10  
11  
12  
13

### 14 *Outcomes*

15  
16  
17 The primary outcome of interest was a composite outcome of the earlier of time to  
18 intubation or time to inpatient death. Time until composite event was censored at time of  
19 discharge for patients who were discharged alive with no intubation during their hospitalization.  
20  
21 The rationale for the combined primary outcome was twofold: 1) many patients who deteriorated  
22 clinically died without being intubated, often due to transition to palliative care; and 2)  
23 hospitalization stays for intubated COVID-19 patients have been very long, and many intubated  
24 COVID-19 patients at the time of the analyses may not ultimately survive. For a sensitivity  
25 analysis, we used death as the outcome. We tracked all patients who were not discharged or died  
26 until June 1, 2020.  
27  
28  
29  
30  
31  
32  
33  
34  
35  
36  
37  
38  
39

### 40 *Covariates*

41  
42 We collected data on patients' demographic characteristics and comorbidities.  
43  
44 Demographic characteristics included age, sex, race/ethnicity, and health insurance (commercial,  
45 Medicaid, Medicare, other, and no insurance). We used patient-reported race and ethnicity  
46 information and categorized patients into one of five racial/ethnic groups: White, Black, Asian,  
47 Other/Multiracial, and Unknown/Declined. We also identified a subgroup of patients who  
48 received immunomodulatory medications, including steroids (prednisone or  
49  
50  
51  
52  
53  
54  
55  
56  
57  
58  
59  
60

1  
2  
3 methylprednisolone), sarilumab, tocilizumab, anakinra, or colchicine, and included this  
4  
5 information as a covariate. We identified the presence of the following comorbidities by  
6  
7 *International Statistical Classification of Disease and Related Health Problems, Tenth Revision*  
8  
9 *(ICD-10)* coding: cancer, coronary artery disease, hypertension, asthma, chronic obstructive  
10  
11 pulmonary disease, diabetes, chronic liver disease, chronic kidney disease, and end stage renal  
12  
13 disease. We calculated the Charlson Comorbidity Index, which is an index that predicts the 10-  
14  
15 year survival of patients with multiple comorbidities, as a measure of total comorbidity burden.<sup>20</sup>  
16  
17 The only covariate with missing data was BMI, and we categorized the BMI group as not obese  
18  
19 (BMI less than 30kg/m<sup>2</sup>), obese (BMI greater than or equal to 30kg/m<sup>2</sup>), and missing BMI.  
20  
21

22  
23  
24 We categorized changes in FDA recommendation for hydroxychloroquine, into three  
25  
26 time periods: 1) pre-FDA approval (March 1-March 27, 2020); 2) FDA approval (March 28-  
27  
28 April 23, 2020); and 3) FDA warning (April 24-May 11, 2020).  
29  
30

### 31 32 33 *Statistical analysis*

34  
35 All analyses were performed using version 3.5.2 of the R Programming Language (R  
36  
37 Project for Statistical Computing, R Foundation, Vienna, Austria). We first performed chi-square  
38  
39 and 2-sample t-tests to compare patient characteristics treated with hydroxychloroquine to no  
40  
41 hydroxychloroquine (control).  
42  
43

44  
45 We used propensity-score matching methods, 1:2 for the pre-FDA approval and the FDA  
46  
47 warning periods and 1:1 for the FDA approval period, using the smaller group as a reference,  
48  
49 within each period and applied the nearest-neighbor method to create a matched control sample.  
50  
51 The propensity-score matching was performed within each period so that patients admitted  
52  
53  
54  
55  
56  
57  
58  
59  
60

1  
2  
3 within the FDA approval period were not matched to patients in the pre-FDA approval or FDA  
4 warning periods, so as not to confound the effect of different FDA recommendations.  
5  
6

7 We then took the following approach to conduct the analysis. We first performed logistic  
8 regressions to compare the propensity score-matched hydroxychloroquine group to the control  
9 group. For a time-to-event analysis, we used the Kaplan-Meier survival estimate and log-rank  
10 test. We examined the Kaplan-Meier survival curves for the treatment group compared to the  
11 control group, separated by the different FDA recommendation periods. If a patient was  
12 discharged alive without intubation, data was censored at the time of hospital discharge. Then,  
13 we used Cox proportional-hazard regression models to estimate the association between the  
14 propensity-matched treatment group to the control group with respect to end point free survival  
15 time. We used the Schoenfeld residuals to test the proportional hazard assumption in the Cox  
16 model.  
17  
18  
19  
20  
21  
22  
23  
24  
25  
26  
27  
28  
29  
30  
31  
32

## 33 **Results**

### 34 *Characteristics of the cohort*

35 From a cohort of 10,009 patients, 3,270 (32.7%) were treated with hydroxychloroquine,  
36 2,640 (26.4%) with neither hydroxychloroquine nor azithromycin, 1,289 (12.9%) with  
37 azithromycin only, and 2,810 (28.1%) with the combination hydroxychloroquine and  
38 azithromycin. There were differences in the number of patients treated with or without  
39 hydroxychloroquine and/or azithromycin by admission period (Figure 1).  
40  
41  
42  
43  
44  
45  
46  
47  
48

49 We found significant differences in the use of hydroxychloroquine and patient  
50 characteristics based on changes to FDA recommendation. Number and percentages of patients  
51 treated with hydroxychloroquine were 192/2202 (8.7%) pre-FDA approval, 2902/6741 (43.0%)  
52  
53  
54  
55  
56  
57  
58  
59  
60

1  
2  
3 during FDA approval, and 176 (16.5%) during the FDA warning period (p-value<0.001). There  
4  
5 was a significant increase in number of patients during the FDA approval period (March 28-  
6  
7 April 23). During the pre-FDA approval period, there were 2,202 patients admitted with COVID-  
8  
9 19 infection, but in the following periods, the number of patients admitted with COVID-19  
10  
11 infections was 6,741 (FDA approval period) and 1,066 (FDA warning period). Throughout the  
12  
13 study, and independent of FDA periods, there were differences in sociodemographic and clinical  
14  
15 characteristics between the treatment group compared to the control group (Table 1). Higher  
16  
17 percentage of patients who were younger (36.8% vs 32.5% were less than 60 years old), male  
18  
19 (59.9% vs 53.4%), and had commercial insurance (31.0% vs 24.2%) were treated with  
20  
21 hydroxychloroquine (p-values<0.001). Presence of comorbidity was associated with  
22  
23 hydroxychloroquine use (all p-values<0.05), except for asthma and diabetes, and chronic kidney  
24  
25 disease.  
26  
27  
28  
29

30  
31 Hydroxychloroquine groups (13.4%) had higher rates of intubation compared to the  
32  
33 control group (7.0%) (p-value<0.001). Inpatient mortality was 20.2% for hydroxychloroquine  
34  
35 versus 18.3% for no hydroxychloroquine treatment (p-value=0.01). A significantly higher  
36  
37 percentage of patients treated with hydroxychloroquine (23.4%) reached the composite outcome  
38  
39 compared to the control group (20.4%) (p-value=0.007). A higher percentage of patients on  
40  
41 hydroxychloroquine (52.8%) were treated concurrently with immunomodulatory medications  
42  
43 compared to the control group (24.7%) (p-value<0.001).  
44  
45

46  
47 After propensity-score matching within each time period, sociodemographic  
48  
49 characteristics and comorbidity were similar between hydroxychloroquine and no  
50  
51 hydroxychloroquine group (Table 2). There were 576 patients in the pre-FDA approval period,  
52  
53 2812 patients in the FDA approval period, and 528 FDA warning period. There was a higher  
54  
55  
56  
57  
58  
59

1  
2  
3 composite outcome among patients treated with hydroxychloroquine (25.5%) compared to no  
4 hydroxychloroquine (17.2%) during the pre-FDA approval period (p-value=0.03) but no  
5  
6 difference in the number of composite outcomes between hydroxychloroquine and no  
7  
8 hydroxychloroquine groups in the FDA-approval period (25.5%, vs 22.6% p=0.08) or the FDA  
9  
10 warning period (21.0 vs 15.1% %, p=0.11) (Table 3). In multivariable logistic regression  
11  
12 analysis, hydroxychloroquine use was associated with increased odds of the composite outcome  
13  
14 during the pre-FDA approval period (OR=1.65 [1.09-2.51]) but there was no association during  
15  
16 the FDA approval (OR=1.17 [0.99-1.39]) as well as the FDA warning period (OR=1.50 [0.94-  
17  
18 2.39]).  
19  
20  
21  
22  
23  
24  
25

### 26 *Time-to event analysis*

27  
28 Figure 2 shows the Kaplan-Meier curves of freedom from the composite end point of  
29  
30 intubation and inpatient mortality during the pre-FDA approval period, the FDA approval period,  
31  
32 or the FDA warning period. The cox proportional-hazard regression models showed  
33  
34 hydroxychloroquine use was associated with the composite outcome of intubation and inpatient  
35  
36 mortality during the pre-FDA approval (hazard ratio=1.70 [1.17-2.48]) and the FDA warning  
37  
38 (hazard ratio=1.53 [1.00-2.34]) period but not during the FDA approval period (hazard  
39  
40 ratio=1.03 [0.88-1.20]) (Table 3).  
41  
42  
43  
44  
45  
46  
47  
48

### 49 **Discussion**

50  
51 In our study, while there were changes in percentage of COVID-19 patients treated with  
52  
53 hydroxychloroquine with FDA recommendations, there was also a fluctuation of the number of  
54  
55  
56  
57  
58  
59  
60

1  
2  
3 hospitalized patients with COVID-19 infections during the FDA approval period.

4  
5 Hydroxychloroquine treatment was associated with increased composite outcome of intubation  
6  
7 or death during pre-FDA approval period but not during FDA approval or FDA warning period.

8  
9  
10 The overall association of hydroxychloroquine treatment among COVID-19 patients in our  
11  
12 cohort was similar to previous studies showing no association between the treatment and primary  
13  
14 end point of intubation or death.<sup>14,15</sup>

15  
16  
17 Although not captured in our study, hospitals during the FDA approval period had to  
18  
19 manage sudden increases in critically ill patients. As hospitals were reaching their maximum  
20  
21 capacity, coordinated efforts were made to ensure that there were adequate ventilators for  
22  
23 patients with pulmonary complications, goals of care discussions for patients with poor  
24  
25 prognosis, and an increase in ambulatory management to ensure medical care for all patients.<sup>21-23</sup>  
26  
27 Therefore, patients who were admitted during this period may have had more severe disease,  
28  
29 including hypoxia, requiring ventilators. This hypothesis is also consistent with the higher  
30  
31 proportions of patients experiencing the composite outcome during this period. There was also  
32  
33 an increased use of immunomodulators, which were more often used for patients with more  
34  
35 complications, including acute respiratory distress syndrome, acute kidney injury, thrombosis,  
36  
37 etc.<sup>1,24,25</sup> Therefore, regardless of whether they were being treated with hydroxychloroquine or  
38  
39 not, patients admitted during the FDA approval period had overall worse outcomes compared to  
40  
41 patients admitted during other periods. Because of such differences in patient disease severity  
42  
43 and hospital settings, we used propensity-score matching of patients within each period so that  
44  
45 the patients treated in the pre-FDA approval or FDA warning periods were not matched with  
46  
47 patients treated in the FDA approval period.  
48  
49  
50  
51  
52  
53  
54  
55  
56  
57  
58  
59  
60



1  
2  
3 The lack of efficacy of hydroxychloroquine could be attributed to the severity of disease  
4 among patients receiving medication. The hypothesized mechanism of action of  
5 hydroxychloroquine is that it prevents the virus from entering cells and blocks viral replication.<sup>4</sup>  
6  
7  
8  
9  
10 <sup>6</sup> These patients were hospitalized because of a severe course of disease, and therefore it is likely  
11 that viral replication was already high when hydroxychloroquine was administered. This may be  
12 particularly true for patients who were hospitalized during the FDA approved period because  
13 hospitals had a high number of COVID-19 patients requiring inpatient care. Also,  
14 hydroxychloroquine may have been administered to more severely ill patients and subsequently  
15 was associated with higher risk of intubation and/or inpatient mortality. We addressed this by  
16 propensity-score matching patients treated with hydroxychloroquine to no hydroxychloroquine.  
17 Of note, higher doses of hydroxychloroquine have been associated with adverse intermediate  
18 outcomes, including QTc prolongation, in another study.<sup>26</sup>  
19  
20  
21  
22  
23  
24  
25  
26  
27  
28  
29  
30

31 This study has several limitations. Due to the observational study design, this study does  
32 not establish causal relationships between medication treatment and outcomes. Also, this study is  
33 limited to the inpatient setting, therefore the study findings are not generalizable to outpatient or  
34 community settings. Though we did attempt to adjust for covariates, it is possible that the  
35 severity of illness and precise timing of treatment also may have influenced the association of  
36 these medications with the outcome. There might be a subset of patients who were taking  
37 hydroxychloroquine prescribed by their ambulatory providers prior to their hospitalization. It is  
38 possible that some patients in the no hydroxychloroquine group were taking the medications or  
39 already had completed their 5-day course prior to hospitalization. There was a subset of patients  
40 in the control group who were treated with hydroxychloroquine or azithromycin after 48 hours  
41 because of their disease progression. The changes in the FDA recommendations probably also  
42  
43  
44  
45  
46  
47  
48  
49  
50  
51  
52  
53  
54  
55  
56  
57  
58  
59  
60

1  
2  
3 caused some patients admitted during the pre-FDA approval period to be treated with  
4 hydroxychloroquine during their prolonged hospitalizations. This could result in bias toward the  
5 null, that is, erroneously concluding no difference between hydroxychloroquine and control  
6 (Type II error).  
7  
8  
9  
10  
11

12 In addition to changes in the FDA recommendation, this study addresses changes in case  
13 mix due to changes in number of COVID-19 patients being hospitalized. Regardless of FDA  
14 recommendation for the drug, we did not observe any beneficial association of  
15 hydroxychloroquine use throughout the study period. This study suggests that  
16 hydroxychloroquine may not alter the clinical course among patients with COVID-19 infections  
17 in the inpatient setting where patients have more severe disease. However, it is unclear whether  
18 hydroxychloroquine treatment can be used in patients with milder symptoms and possibly in an  
19 outpatient setting. On June 15, 2020, the FDA revoked the Emergency Use Authorization for  
20 hydroxychloroquine in the treatment of COVID-19 infection and this will further decrease the  
21 number of COVID-19 patients being treated with hydroxychloroquine.<sup>27</sup> These study results  
22 should not be used as guidance on whether or not to treat COVID-19 patients with or without  
23 hydroxychloroquine due to its observational design.  
24  
25  
26  
27  
28  
29  
30  
31  
32  
33  
34  
35  
36  
37  
38  
39  
40  
41

#### 42 **Data Availability Statement**

43  
44 The data that support the findings of this study are available on request from  
45 [COVID19@northwell.edu](mailto:COVID19@northwell.edu). The data are not publicly available due to restrictions as it could  
46 compromise the privacy of research participants.  
47  
48  
49  
50  
51

#### 52 **Conflict of Interest Disclosures**

1  
2  
3 The authors report no real or apparent conflicts of interest.  
4  
5  
6

7  
8 **Funding/Support**  
9

10 This work was supported by grants R24AG064191 from the National Institute on Aging of the  
11 National Institutes of Health and R01LM012836 from the National Library of Medicine of the  
12 National Institutes of Health.  
13  
14  
15  
16

17  
18  
19 **Role of the Funder/Sponsor**  
20

21 The funders had no role in the design and conduct of the study; collection, management,  
22 analysis, and interpretation of the data; preparation, review, or approval of the manuscript; and  
23 decision to submit the manuscript for publication. The views expressed in this paper are those of  
24 the authors and do not represent the views of the National Institutes of Health, the United States  
25 Department of Health and Human Services, or any other government entity.  
26  
27  
28  
29  
30  
31  
32  
33  
34

35 **Patient and Public Involvement**  
36

37 Patients or the public were not involved in the design, or conduct, or reporting, or dissemination  
38 plans of our research  
39  
40  
41  
42  
43  
44  
45  
46  
47  
48  
49  
50  
51  
52  
53  
54  
55  
56  
57  
58  
59  
60

## References

1. Wu C, Chen X, Cai Y, et al. Risk Factors Associated With Acute Respiratory Distress Syndrome and Death in Patients With Coronavirus Disease 2019 Pneumonia in Wuhan, China. *JAMA Intern Med.* 2020.
2. Richardson S, Hirsch JS, Narasimhan M, et al. Presenting Characteristics, Comorbidities, and Outcomes Among 5700 Patients Hospitalized With COVID-19 in the New York City Area. *JAMA.* 2020.
3. The Center for Systems Science and Engineering at Johns Hopkins University. COVID-19 dashboard. 2020; <https://www.arcgis.com/apps/opsdashboard/index.html#/bda7594740fd40299423467b48e9ecf6>. Accessed June 10, 2020.
4. Yao X, Ye F, Zhang M, et al. In Vitro Antiviral Activity and Projection of Optimized Dosing Design of Hydroxychloroquine for the Treatment of Severe Acute Respiratory Syndrome Coronavirus 2 (SARS-CoV-2). *Clin Infect Dis.* 2020.
5. Wang M, Cao R, Zhang L, et al. Remdesivir and chloroquine effectively inhibit the recently emerged novel coronavirus (2019-nCoV) in vitro. *Cell Res.* 2020;30(3):269-271.
6. Vincent MJ, Bergeron E, Benjannet S, et al. Chloroquine is a potent inhibitor of SARS coronavirus infection and spread. *Virology.* 2005;2:69.
7. Liu J, Cao R, Xu M, et al. Hydroxychloroquine, a less toxic derivative of chloroquine, is effective in inhibiting SARS-CoV-2 infection in vitro. *Cell Discov.* 2020;6:16.
8. Andreani J, Le Bideau M, Duflot I, et al. In vitro testing of combined hydroxychloroquine and azithromycin on SARS-CoV-2 shows synergistic effect. *Microb Pathog.* 2020;145:104228.
9. Grassin-Delyle S, Salvator H, Brollo M, et al. Chloroquine inhibits the release of inflammatory cytokines by human lung explants. *Clin Infect Dis.* 2020.
10. Schrezenmeier E, Dorner T. Mechanisms of action of hydroxychloroquine and chloroquine: implications for rheumatology. *Nat Rev Rheumatol.* 2020;16(3):155-166.
11. Gautret P, Lagier JC, Parola P, et al. Hydroxychloroquine and azithromycin as a treatment of COVID-19: results of an open-label non-randomized clinical trial. *Int J Antimicrob Agents.* 2020:105949.
12. Gao J, Tian Z, Yang X. Breakthrough: Chloroquine phosphate has shown apparent efficacy in treatment of COVID-19 associated pneumonia in clinical studies. *Biosci Trends.* 2020;14(1):72-73.
13. Chen Z, Hu J, Zhang Z, et al. Efficacy of hydroxychloroquine in patients with COVID-19: results of a randomized clinical trial. *medRxiv.* 2020.
14. Geleris J, Sun Y, Platt J, et al. Observational Study of Hydroxychloroquine in Hospitalized Patients with Covid-19. *N Engl J Med.* 2020.
15. Rosenberg ES, Dufort EM, Udo T, et al. Association of Treatment With Hydroxychloroquine or Azithromycin With In-Hospital Mortality in Patients With COVID-19 in New York State. *JAMA.* 2020.
16. Tang W, Cao Z, Han M, et al. Hydroxychloroquine in patients with mainly mild to moderate coronavirus disease 2019: open label, randomised controlled trial. *BMJ.* 2020;369:m1849.

17. Molina JM, Delaugerre C, Le Goff J, et al. No evidence of rapid antiviral clearance or clinical benefit with the combination of hydroxychloroquine and azithromycin in patients with severe COVID-19 infection. *Med Mal Infect.* 2020;50(4):384.
18. Magagnoli J, Narendran S, Pereira F, et al. Outcomes of hydroxychloroquine usage in United States veterans hospitalized with Covid-19. *medRxiv.* 2020.
19. Hydroxychloroquine or Chloroquine for COVID-19: Drug Safety Communication - FDA Cautions Against Use Outside of the Hospital Setting or a Clinical Trial Due to Risk of Heart Rhythm Problems. <https://www.fda.gov/safety/medical-product-safety-information/hydroxychloroquine-or-chloroquine-covid-19-drug-safety-communication-fda-cautions-against-use>. Accessed May 15, 2020.
20. Charlson ME, Pompei P, Ales KL, MacKenzie CR. A new method of classifying prognostic comorbidity in longitudinal studies: development and validation. *J Chronic Dis.* 1987;40(5):373-383.
21. Curtis JR, Kross EK, Stapleton RD. The Importance of Addressing Advance Care Planning and Decisions About Do-Not-Resuscitate Orders During Novel Coronavirus 2019 (COVID-19). *JAMA.* 2020.
22. Greenhalgh T, Koh GCH, Car J. Covid-19: a remote assessment in primary care. *BMJ.* 2020;368:m1182.
23. White DB, Lo B. A Framework for Rationing Ventilators and Critical Care Beds During the COVID-19 Pandemic. *JAMA.* 2020.
24. Hirsch JS, Ng JH, Ross DW, et al. Acute Kidney Injury in Patients Hospitalized with Covid-19. *Kidney Int.* 2020.
25. Connors JM, Levy JH. COVID-19 and its implications for thrombosis and anticoagulation. *Blood.* 2020;135(23):2033-2040.
26. Borba MGS, Val FFA, Sampaio VS, et al. Effect of High vs Low Doses of Chloroquine Diphosphate as Adjunctive Therapy for Patients Hospitalized With Severe Acute Respiratory Syndrome Coronavirus 2 (SARS-CoV-2) Infection: A Randomized Clinical Trial. *JAMA Netw Open.* 2020;3(4):e208857.
27. Coronavirus (COVID-19) Update: FDA Revokes Emergency Use Authorization for Chloroquine and Hydroxychloroquine. June 15, 2020; <https://www.fda.gov/news-events/press-announcements/coronavirus-covid-19-update-fda-revokes-emergency-use-authorization-chloroquine-and>. Accessed June 20, 2020.

Table 1. Patient characteristics before propensity-score matching, number (percentage) for categorical variable and mean (standard deviation) for continuous variable

|                                         | All<br>(n=10,009) | HCQ<br>(n=3,270) | No HCQ<br>(n=2,640) | P-value* |
|-----------------------------------------|-------------------|------------------|---------------------|----------|
| <b>Sociodemographic characteristics</b> |                   |                  |                     |          |
| Age at admission, mean (SD)             | 64.99 (16.35)     | 64.29 (15.58)    | 66.87 (17.73)       | <0.001   |
| Age group                               |                   |                  |                     | <0.001   |
| 18-49                                   | 1747 (17.5)       | 558 (17.1)       | 434 (16.4)          |          |
| 50-59                                   | 1863 (18.6)       | 645 (19.7)       | 425 (16.1)          |          |
| 60-69                                   | 2277 (22.7)       | 816 (25.0)       | 530 (20.1)          |          |
| 70-79                                   | 2046 (20.4)       | 671 (20.5)       | 518 (19.6)          |          |
| 80+                                     | 2076 (20.7)       | 580 (17.7)       | 733 (27.8)          |          |
| Male                                    | 5847 (58.4)       | 1959 (59.9)      | 1411 (53.4)         | <0.001   |
| Race                                    |                   |                  |                     | <0.001   |
| White                                   | 3923 (39.2)       | 1151 (35.2)      | 1182 (44.8)         |          |
| Black                                   | 2104 (21.0)       | 632 (19.3)       | 581 (22.0)          |          |
| Asian                                   | 849 (8.5)         | 327 (10.0)       | 236 (8.9)           |          |
| Other/Multiracial                       | 2648 (26.5)       | 958 (29.3)       | 540 (20.5)          |          |
| Unknown                                 | 485 (4.8)         | 202 (6.2)        | 101 (3.8)           |          |
| Health insurance                        |                   |                  |                     | <0.001   |
| Commercial                              | 2947 (29.4)       | 1013 (31.0)      | 638 (24.2)          |          |
| Medicaid                                | 2041 (20.4)       | 712 (21.8)       | 488 (18.5)          |          |
| Medicare                                | 4754 (47.5)       | 1431 (43.8)      | 1453 (55.0)         |          |
| Other                                   | 133 (1.3)         | 46 (1.4)         | 45 (1.7)            |          |
| No insurance                            | 134 (1.3)         | 68 (2.1)         | 16 (0.6)            |          |
| <b>Comorbidity</b>                      |                   |                  |                     |          |
| Cancer                                  | 832 (8.3)         | 238 (7.3)        | 278 (10.5)          | <0.001   |
| Coronary artery disease                 | 1339 (13.4)       | 399 (12.2)       | 429 (16.2)          | <0.001   |
| Hypertension                            | 6073 (60.7)       | 1973 (60.3)      | 1673 (63.4)         | 0.02     |
| Peripheral artery/vascular disease      | 282 (2.8)         | 81 (2.5)         | 100 (3.8)           | 0.005    |
| Asthma                                  | 842 (8.4)         | 271 (8.3)        | 198 (7.5)           | 0.29     |
| Chronic obstructive pulmonary disease   | 639 (6.4)         | 168 (5.1)        | 174 (6.6)           | 0.02     |
| Diabetes                                | 3624 (36.2)       | 1233 (37.7)      | 945 (35.8)          | 0.14     |
| Chronic liver disease                   | 298 (3.0)         | 74 (2.3)         | 110 (4.2)           | <0.001   |
| Chronic kidney disease                  | 507 (5.1)         | 155 (4.7)        | 152 (5.8)           | 0.09     |
| End stage renal disease                 | 461 (4.6)         | 144 (4.4)        | 168 (6.4)           | 0.001    |
| Charlson Comorbidity Index, mean SD     | 4.89 (3.58)       | 4.56 (3.38)      | 5.74 (3.77)         | <0.001   |
| Obesity                                 |                   |                  |                     | <0.001   |
| Obese                                   | 2810 (28.1)       | 1001 (30.6)      | 570 (21.6)          |          |
| Not obese                               | 4632 (46.3)       | 1483 (45.4)      | 1296 (49.1)         |          |
| Missing BMI                             | 2567 (25.6)       | 786 (24.0)       | 774 (29.3)          |          |
| BMI, mean (SD)                          | 29.23 (7.06)      | 29.66 (7.04)     | 28.13 (7.14)        | <0.001   |

1  
2  
3  
4  
5  
6  
7  
8  
9  
10  
11  
12  
13  
14  
15  
16  
17  
18  
19  
20  
21  
22  
23  
24  
25  
26  
27  
28  
29  
30  
31  
32  
33  
34  
35  
36  
37  
38  
39  
40  
41  
42  
43  
44  
45  
46  
47  
48  
49  
50  
51  
52  
53  
54  
55  
56  
57  
58  
59  
60**Clinical outcomes**

|                           |             |             |             |        |
|---------------------------|-------------|-------------|-------------|--------|
| Admission week            |             |             |             | <0.001 |
| Pre-FDA approval          | 2202 (22.0) | 192 (5.9)   | 496 (18.8)  |        |
| FDA approval              | 6741 (67.3) | 2902 (88.7) | 1406 (53.3) |        |
| FDA warning               | 1066 (10.7) | 176 (5.4)   | 738 (28.0)  |        |
| Length of stay, mean (SD) | 9.51 (9.60) | 9.56 (9.14) | 8.80 (9.27) | 0.001  |
| Immunomodulator use       | 4183 (41.8) | 1727 (52.8) | 651 (24.7)  | <0.001 |
| ICU stay                  | 1985 (19.8) | 583 (17.8)  | 426 (16.1)  | 0.09   |
| Mechanical ventilation    | 1314 (13.1) | 437 (13.4)  | 186 (7.0)   | <0.001 |
| Inpatient mortality       | 1983 (19.8) | 660 (20.2)  | 482 (18.3)  | 0.01   |
| Composite Outcome         | 2413 (24.1) | 764 (23.4)  | 538 (20.4)  | 0.007  |

\* Comparing hydroxychloroquine group to no treatment group

Table 2. Patient characteristics after propensity-score matching, number (percentage) for categorical variable and mean (standard deviation) for continuous variable

|                                             | Pre-FDA approval |                   |              |       | FDA approval    |                    |              |       | FDA warning    |                   |              |       |
|---------------------------------------------|------------------|-------------------|--------------|-------|-----------------|--------------------|--------------|-------|----------------|-------------------|--------------|-------|
|                                             | HCQ<br>(n=192)   | No HCQ<br>(n=384) | P-<br>value* | SMD   | HCQ<br>(n=1406) | No HCQ<br>(n=1406) | P-<br>value* | SMD   | HCQ<br>(n=176) | No HCQ<br>(n=352) | P-<br>value* | SMD   |
| <b>Sociodemographic characteristics</b>     |                  |                   |              |       |                 |                    |              |       |                |                   |              |       |
| Age at admission,<br>mean (SD)              | 61.1 (15.8)      | 62.8 (17.2)       | 0.26         | 0.101 | 67.8 (15.8)     | 67.3 (17.6)        | 0.42         | 0.03  | 66.2<br>(16.2) | 66.3 (17.6)       | 0.94         | 0.007 |
| Male                                        | 109 (56.8)       | 218 (56.8)        | 1.00         | 0.01  | 740 (52.6)      | 765 (54.4)         | 0.36         | 0.036 | 92 (52.3)      | 194 (55.1)        | 0.60         | 0.057 |
| Race                                        |                  |                   | 0.68         | 0.134 |                 |                    | 1.00         | 0.013 |                |                   | 0.99         | 0.05  |
| White                                       | 91 (47.4)        | 180 (46.9)        |              |       | 610 (43.4)      | 612 (43.5)         |              |       | 65 (36.9)      | 136 (38.6)        |              |       |
| Black                                       | 35 (18.2)        | 86 (22.4)         |              |       | 306 (21.8)      | 302 (21.5)         |              |       | 37 (21.0)      | 69 (19.6)         |              |       |
| Asian                                       | 17 (8.9)         | 37 (9.6)          |              |       | 143 (10.2)      | 143 (10.2)         |              |       | 12 (6.8)       | 25 (7.1)          |              |       |
| Other/Multiracial                           | 44 (22.9)        | 72 (18.8)         |              |       | 297 (21.1)      | 296 (21.1)         |              |       | 53 (30.1)      | 106 (30.1)        |              |       |
| Unknown                                     | 5 (2.6)          | 9 (2.3)           |              |       | 50 (3.6)        | 53 (3.8)           |              |       | 9 (5.1)        | 16 (4.5)          |              |       |
| Health insurance                            |                  |                   | 0.02         | 0.257 |                 |                    | 0.90         | 0.039 |                |                   | 1.00         | 0.036 |
| Commercial                                  | 91 (47.4)        | 134 (34.9)        |              |       | 306 (21.8)      | 321 (22.8)         |              |       | 44 (25.0)      | 92 (26.1)         |              |       |
| Medicaid                                    | 30 (15.6)        | 72 (18.8)         |              |       | 246 (17.5)      | 249 (17.7)         |              |       | 31 (17.6)      | 62 (17.6)         |              |       |
| Medicare                                    | 71 (37.0)        | 178 (46.4)        |              |       | 819 (58.3)      | 805 (57.3)         |              |       | 92 (52.3)      | 182 (51.7)        |              |       |
| Other                                       | 0 (0.0)          | 0 (0.0)           |              |       | 27 (1.9)        | 22 (1.6)           |              |       | 6 (3.4)        | 11 (3.1)          |              |       |
| No insurance                                | 0 (0.0)          | 0 (0.0)           |              |       | 8 (0.6)         | 9 (0.6)            |              |       | 3 (1.7)        | 5 (1.4)           |              |       |
| <b>Comorbidity</b>                          |                  |                   |              |       |                 |                    |              |       |                |                   |              |       |
| Cancer                                      | 10 (5.2)         | 25 (6.5)          | 0.67         | 0.055 | 134 (9.5)       | 151 (10.7)         | 0.32         | 0.04  | 16 (9.1)       | 30 (8.5)          | 0.96         | 0.02  |
| Coronary artery<br>disease                  | 23 (12.0)        | 56 (14.6)         | 0.47         | 0.077 | 218 (15.5)      | 222 (15.8)         | 0.88         | 0.008 | 27 (15.3)      | 53 (15.1)         | 1.00         | 0.008 |
| Hypertension                                | 109 (56.8)       | 237 (61.7)        | 0.29         | 0.101 | 915 (65.1)      | 884 (62.9)         | 0.24         | 0.046 | 107 (60.8)     | 205 (58.2)        | 0.64         | 0.052 |
| Peripheral<br>artery/vascular<br>disease    | 7 (3.6)          | 13 (3.4)          | 1.00         | 0.014 | 48 (3.4)        | 42 (3.0)           | 0.59         | 0.024 | 6 (3.4)        | 6 (1.7)           | 0.35         | 0.108 |
| Asthma                                      | 24 (12.5)        | 35 (9.1)          | 0.26         | 0.109 | 88 (6.3)        | 100 (7.1)          | 0.41         | 0.034 | 17 (9.7)       | 32 (9.1)          | 0.96         | 0.019 |
| Chronic<br>obstructive<br>pulmonary disease | 9 (4.7)          | 23 (6.0)          | 0.65         | 0.058 | 83 (5.9)        | 87 (6.2)           | 0.81         | 0.012 | 14 (8.0)       | 29 (8.2)          | 1.00         | 0.01  |
| Diabetes                                    | 70 (36.5)        | 138 (35.9)        | 0.98         | 0.011 | 515 (36.6)      | 508 (36.1)         | 0.81         | 0.01  | 68 (38.6)      | 131 (37.2)        | 0.82         | 0.029 |
| Chronic liver<br>disease                    | 7 (3.6)          | 15 (3.9)          | 1.00         | 0.014 | 47 (3.3)        | 56 (4.0)           | 0.42         | 0.034 | 7 (4.0)        | 19 (5.4)          | 0.62         | 0.067 |
| Chronic kidney<br>disease                   | 11 (5.7)         | 25 (6.5)          | 0.86         | 0.033 | 84 (6.0)        | 80 (5.7)           | 0.81         | 0.012 | 8 (4.5)        | 17 (4.8)          | 1.00         | 0.013 |



|    |                          |             |             |       |       |             |             |       |       |           |             |       |       |
|----|--------------------------|-------------|-------------|-------|-------|-------------|-------------|-------|-------|-----------|-------------|-------|-------|
| 1  |                          |             |             |       |       |             |             |       |       |           |             |       |       |
| 2  |                          |             |             |       |       |             |             |       |       |           |             |       |       |
| 3  | End stage renal          |             |             |       |       |             |             |       |       |           |             |       | <0.0  |
| 4  | disease                  | 12 (6.2)    | 27 (7.0)    | 0.86  | 0.031 | 99 (7.0)    | 101 (7.2)   | 0.94  | 0.006 | 4 (2.3)   | 8 (2.3)     | 1.00  | 01    |
| 5  | Charlson                 |             |             |       |       |             |             |       |       |           |             |       |       |
| 6  | Comorbidity Index,       |             |             |       |       |             |             |       |       | 5.03      |             |       |       |
| 7  | mean SD                  | 4.23 (3.19) | 4.73 (3.32) | 0.09  | 0.152 | 5.72 (3.75) | 5.69 (3.73) | 0.84  | 0.008 | (3.23)    | 5.01 (3.42) | 0.96  | 0.005 |
| 8  | Obesity                  |             |             | 0.08  | 0.198 |             |             | 0.84  | 0.022 |           |             | 0.96  | 0.027 |
| 9  | Obese                    | 76 (39.6)   | 116 (30.2)  |       |       | 289 (20.6)  | 292 (20.8)  |       |       | 50 (28.4) | 98 (27.8)   |       |       |
| 10 | Not obese                | 69 (35.9)   | 160 (41.7)  |       |       | 678 (48.2)  | 663 (47.2)  |       |       | 84 (47.7) | 166 (47.2)  |       |       |
| 11 | Missing BMI              | 47 (24.5)   | 108 (28.1)  |       |       | 439 (31.2)  | 451 (32.1)  |       |       | 42 (23.9) | 88 (25.0)   |       |       |
| 12 | <b>Clinical outcomes</b> |             |             |       |       |             |             |       |       |           |             |       |       |
| 13 | Length of stay, mean     | 10.88       | 10.48       |       |       |             |             | <0.00 |       | 8.67      |             |       |       |
| 14 | (SD)                     | (11.20)     | (11.79)     | 0.70  | 0.035 | 9.29 (8.66) | 7.75 (7.82) | 1     | 0.187 | (7.55)    | 8.28 (7.40) | 0.57  | 0.053 |
| 15 | Mechanical               |             |             |       |       |             |             | <0.00 |       |           |             |       |       |
| 16 | ventilation              | 33 (17.2)   | 29 (7.6)    | 0.001 | 0.296 | 168 (11.9)  | 85 (6.0)    | 1     | 0.207 | 26 (14.8) | 25 (7.1)    | 0.008 | 0.248 |
| 17 | Inpatient mortality      | 31 (16.1)   | 55 (14.3)   | 0.32  | 0.272 | 318 (22.6)  | 294 (20.9)  | 0.32  | 0.086 | 32 (18.2) | 46 (13.1)   | 1.00  | 0.079 |
| 18 | Composite Outcome        | 49 (25.5)   | 66 (17.2)   | 0.03  | 0.204 | 359 (25.5)  | 318 (22.6)  | 0.08  | 0.068 | 37 (21.0) | 53 (15.1)   | 0.11  | 0.156 |

\* Comparing hydroxychloroquine group to no treatment group

SMD=Standardized mean difference

Table 3. Association between hydroxychloroquine use and the composite end point in the crude analysis and propensity-score matched analysis

| Analysis                                                                  | Results           | P-value* |
|---------------------------------------------------------------------------|-------------------|----------|
| Composite outcome among patients at risk, n (%)                           |                   |          |
| Before propensity score matching                                          |                   |          |
| All periods                                                               |                   |          |
| Overall                                                                   | 2080/10009 (23.9) | -        |
| Hydroxychloroquine                                                        | 764/3270 (23.4)   | 0.007    |
| No HCQ                                                                    | 538/2640 (20.4)   |          |
| After propensity score matching                                           |                   |          |
| Pre-FDA approval                                                          |                   |          |
| Hydroxychloroquine                                                        | 49/192 (25.5)     | 0.03     |
| No HCQ                                                                    | 66/384 (17.2)     |          |
| FDA approval                                                              |                   |          |
| Hydroxychloroquine                                                        | 359/1406 (25.5)   | 0.08     |
| No HCQ                                                                    | 318/1406 (22.6)   |          |
| FDA warning                                                               |                   |          |
| Hydroxychloroquine                                                        | 37/176 (21.0)     | 0.11     |
| No HCQ                                                                    | 53/352 (15.1)     |          |
| Multivariable analysis - odds ratio [95% confidence interval]*            |                   |          |
| Pre-FDA approval (reference: no HCQ)                                      | 1.65 [1.09-2.51]  | 0.02     |
| FDA approval (reference: no HCQ)                                          | 1.17 [0.99-1.39]  | 0.07     |
| FDA warning (reference: no HCQ)                                           | 1.50 [0.94-2.39]  | 0.09     |
| Propensity-score matched analyses-hazard ratio [95% confidence interval]* |                   |          |
| Pre-FDA approval (reference: no HCQ)                                      | 1.70 [1.17-2.48]  | 0.005    |
| FDA approval (reference: no HCQ)                                          | 1.03 [0.88-1.20]  | 0.72     |
| FDA warning (reference: no HCQ)                                           | 1.53 [1.00-2.34]  | 0.05     |

\* Comparing hydroxychloroquine group to no treatment group

1  
2  
3  
4  
5  
6  
7  
8  
9  
10  
11  
12  
13  
14  
15  
16  
17  
18  
19  
20  
21  
22  
23  
24  
25  
26  
27  
28  
29  
30  
31  
32  
33  
34  
35  
36  
37  
38  
39  
40  
41  
42  
43  
44  
45  
46  
47

Figure 1. Number of patients treated with different medications

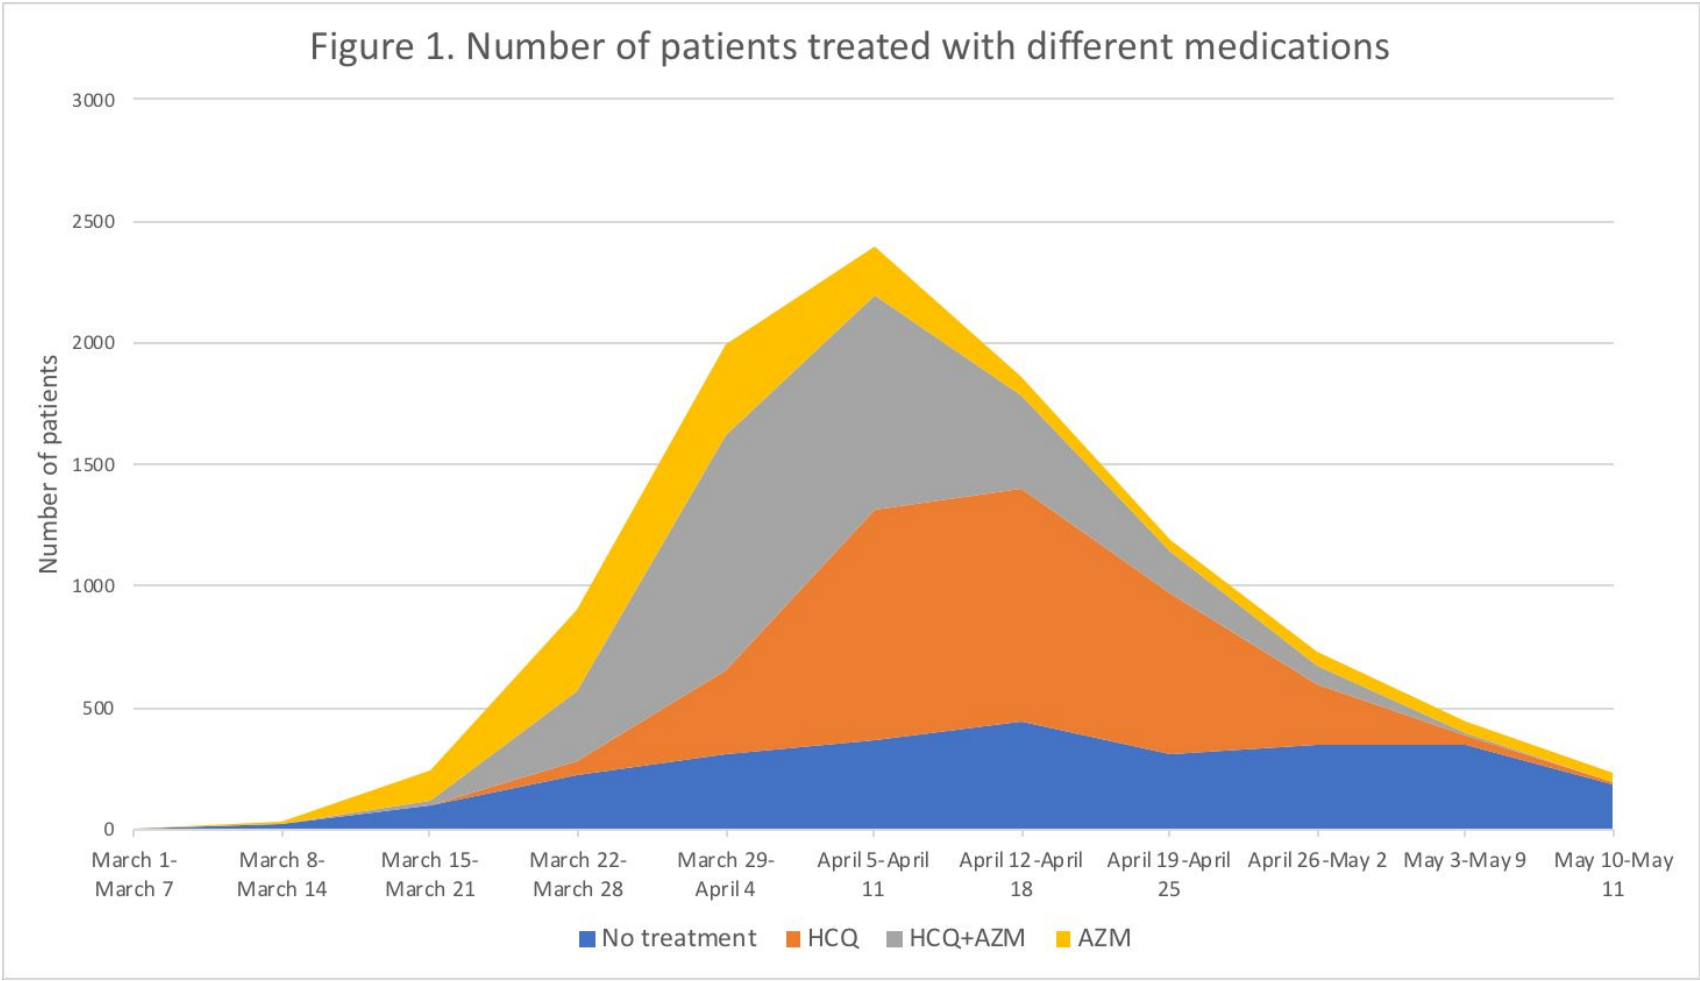

Figure 2. Kaplan-Meier curve showing freedom from composite end point of intubation or inpatient mortality by different time period

a. Pre-FDA approval

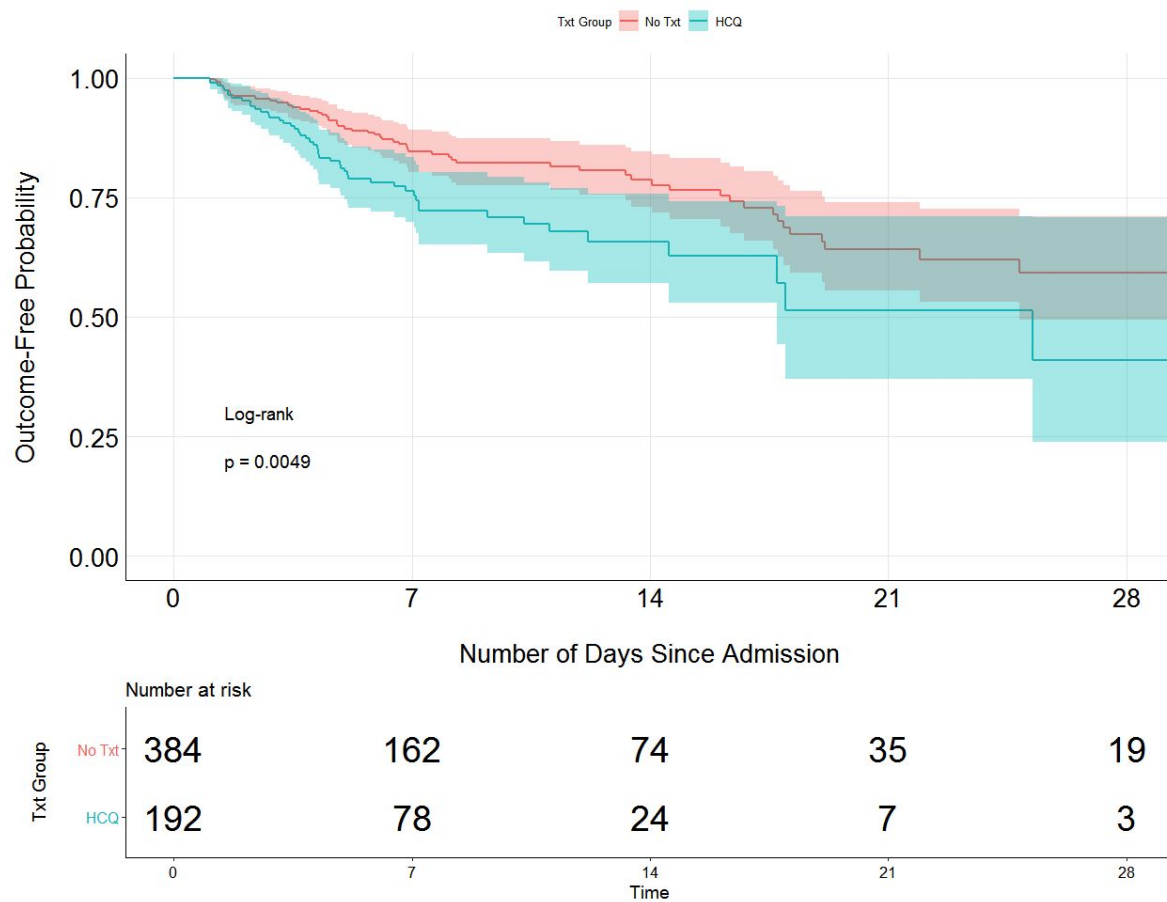

b. FDA approval

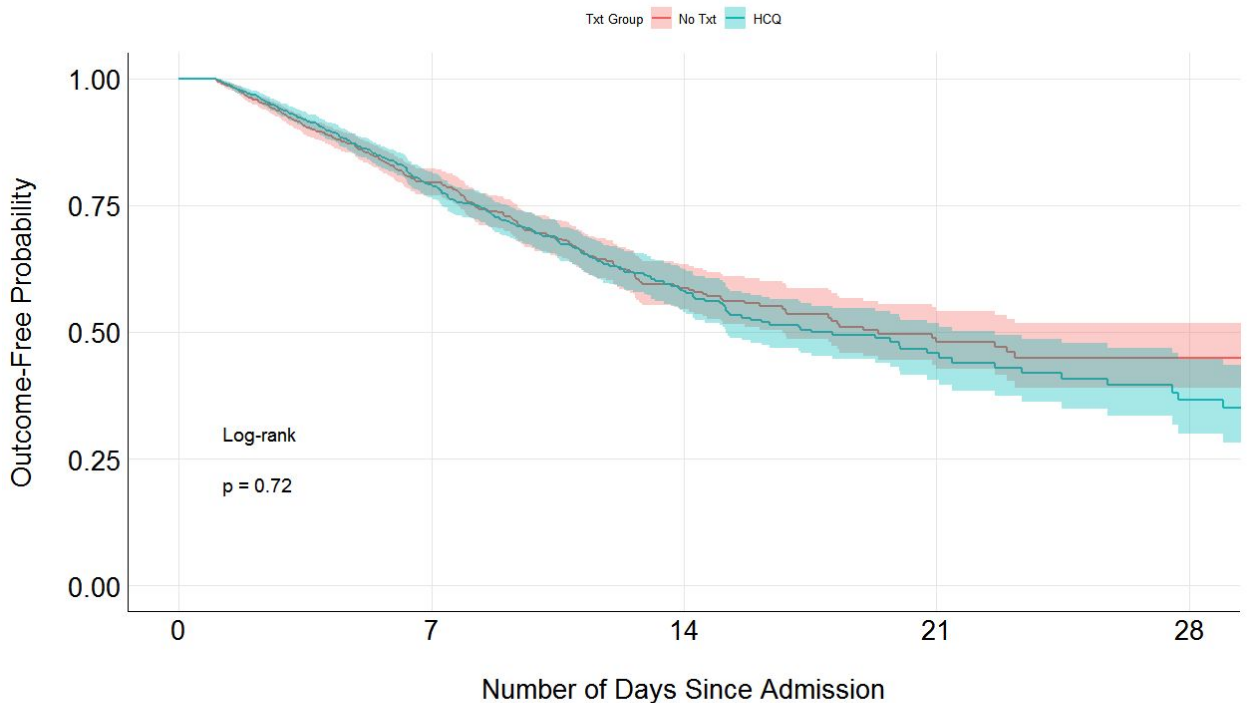

|           |        | Number at risk |      |     |     |    |
|-----------|--------|----------------|------|-----|-----|----|
| Txt Group |        | 0              | 7    | 14  | 21  | 28 |
|           | No Txt |                | 1406 | 498 | 148 | 60 |
| HCQ       |        | 1406           | 589  | 158 | 54  | 24 |

Time

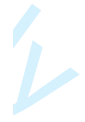

c. FDA warning

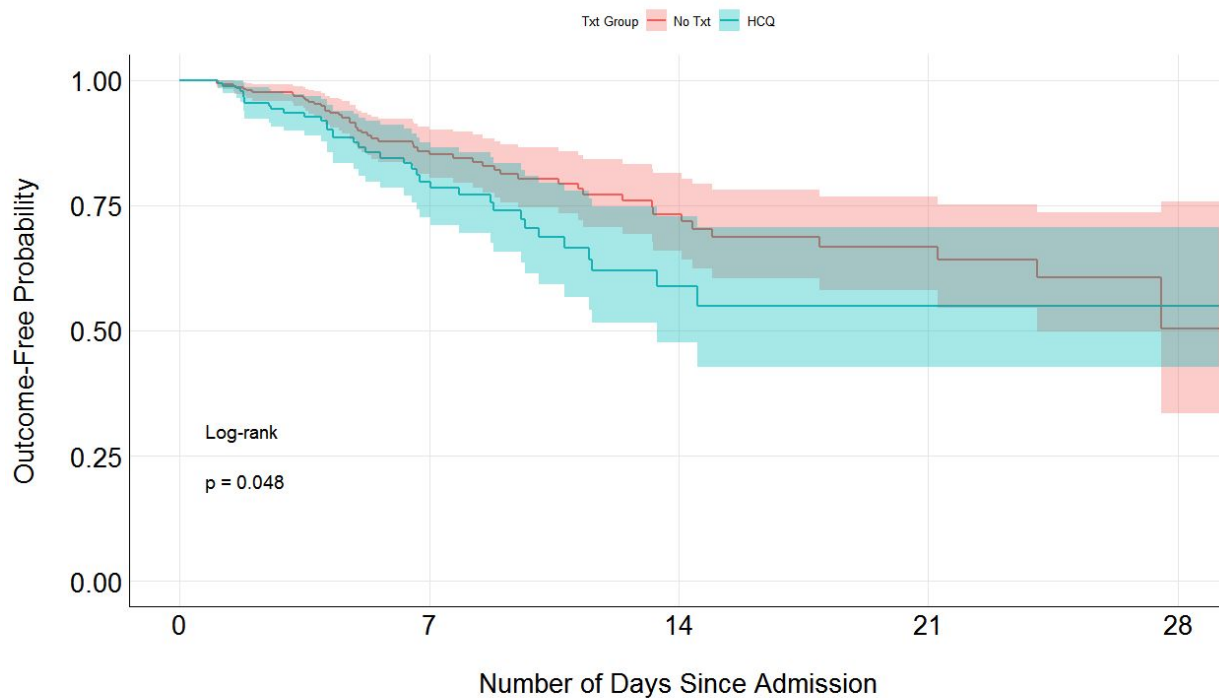

Number at risk

| Txt Group | 0   | 7   | 14 | 21 | 28 |
|-----------|-----|-----|----|----|----|
| No Txt    | 352 | 124 | 51 | 25 | 5  |
| HCQ       | 176 | 64  | 16 | 6  | 1  |

Time

# BMJ Open

## Examination of patient characteristics and hydroxychloroquine use based on U.S. Food and Drug Administration's recommendation: a cross-sectional analysis in New York

|                                 |                                                                                                                                                                                                                                                                                                                                                                                                                                                                                                                                                                                                                                                                                                                                                                                                                                                                                                                                                                           |
|---------------------------------|---------------------------------------------------------------------------------------------------------------------------------------------------------------------------------------------------------------------------------------------------------------------------------------------------------------------------------------------------------------------------------------------------------------------------------------------------------------------------------------------------------------------------------------------------------------------------------------------------------------------------------------------------------------------------------------------------------------------------------------------------------------------------------------------------------------------------------------------------------------------------------------------------------------------------------------------------------------------------|
| Journal:                        | <i>BMJ Open</i>                                                                                                                                                                                                                                                                                                                                                                                                                                                                                                                                                                                                                                                                                                                                                                                                                                                                                                                                                           |
| Manuscript ID                   | bmjopen-2020-042965.R1                                                                                                                                                                                                                                                                                                                                                                                                                                                                                                                                                                                                                                                                                                                                                                                                                                                                                                                                                    |
| Article Type:                   | Original research                                                                                                                                                                                                                                                                                                                                                                                                                                                                                                                                                                                                                                                                                                                                                                                                                                                                                                                                                         |
| Date Submitted by the Author:   | 17-Nov-2020                                                                                                                                                                                                                                                                                                                                                                                                                                                                                                                                                                                                                                                                                                                                                                                                                                                                                                                                                               |
| Complete List of Authors:       | Kim, Eun Ji; Donald and Barbara Zucker School of Medicine at Hofstra/Northwell; Northwell Health Feinstein Institutes for Medical Research,<br>Coppa, Kevin; Northwell Health<br>Hirsch, Jamie; Donald and Barbara Zucker School of Medicine at Hofstra/Northwell; Northwell Health Feinstein Institutes for Medical Research,<br>Abrahams, Sara; Donald and Barbara Zucker School of Medicine at Hofstra/Northwell<br>Johnson, Jennifer; Northwell Health Feinstein Institutes for Medical Research,<br>Lesser, Martin; Northwell Health Feinstein Institutes for Medical Research, Biostatistics; Donald and Barbara Zucker School of Medicine at Hofstra/Northwell<br>Davidson, Karina W.; Feinstein Institute for Medical Research, Research; Donald and Barbara Zucker School of Medicine at Hofstra/Northwell<br>Conigliaro, Joseph; Donald and Barbara Zucker School of Medicine at Hofstra/Northwell; Northwell Health Feinstein Institutes for Medical Research, |
| <b>Primary Subject Heading</b>: | Global health                                                                                                                                                                                                                                                                                                                                                                                                                                                                                                                                                                                                                                                                                                                                                                                                                                                                                                                                                             |
| Secondary Subject Heading:      | Epidemiology, Health policy, Health services research, Infectious diseases, Medical management                                                                                                                                                                                                                                                                                                                                                                                                                                                                                                                                                                                                                                                                                                                                                                                                                                                                            |
| Keywords:                       | COVID-19, Public health < INFECTIOUS DISEASES, Epidemiology < INFECTIOUS DISEASES                                                                                                                                                                                                                                                                                                                                                                                                                                                                                                                                                                                                                                                                                                                                                                                                                                                                                         |
|                                 |                                                                                                                                                                                                                                                                                                                                                                                                                                                                                                                                                                                                                                                                                                                                                                                                                                                                                                                                                                           |

SCHOLARONE™  
Manuscripts



I, the Submitting Author has the right to grant and does grant on behalf of all authors of the Work (as defined in the below author licence), an exclusive licence and/or a non-exclusive licence for contributions from authors who are: i) UK Crown employees; ii) where BMJ has agreed a CC-BY licence shall apply, and/or iii) in accordance with the terms applicable for US Federal Government officers or employees acting as part of their official duties; on a worldwide, perpetual, irrevocable, royalty-free basis to BMJ Publishing Group Ltd ("BMJ") its licensees and where the relevant Journal is co-owned by BMJ to the co-owners of the Journal, to publish the Work in this journal and any other BMJ products and to exploit all rights, as set out in our [licence](#).

The Submitting Author accepts and understands that any supply made under these terms is made by BMJ to the Submitting Author unless you are acting as an employee on behalf of your employer or a postgraduate student of an affiliated institution which is paying any applicable article publishing charge ("APC") for Open Access articles. Where the Submitting Author wishes to make the Work available on an Open Access basis (and intends to pay the relevant APC), the terms of reuse of such Open Access shall be governed by a Creative Commons licence – details of these licences and which [Creative Commons](#) licence will apply to this Work are set out in our licence referred to above.

Other than as permitted in any relevant BMJ Author's Self Archiving Policies, I confirm this Work has not been accepted for publication elsewhere, is not being considered for publication elsewhere and does not duplicate material already published. I confirm all authors consent to publication of this Work and authorise the granting of this licence.



1  
2  
3 **Title: Examination of patient characteristics and hydroxychloroquine use based on U.S.**  
4 **Food and Drug Administration's recommendation: a cross-sectional analysis in New York**  
5

6 Eun Ji Kim, MD, MS, MS<sup>1,2</sup>  
7 Kevin Coppa, BS<sup>3</sup>  
8 Jamie S. Hirsch, MD, MA, MSB<sup>1,2,3</sup>  
9 Sara Abrahams, BS<sup>2</sup>  
10 Jennifer C. Johnson MS, MA<sup>1</sup>  
11 Martin Lesser PhD<sup>1,2</sup>  
12 Karina W. Davidson, PhD, MASc<sup>1,2</sup>  
13 Joseph Conigliaro, MD, MPH<sup>1,2</sup>  
14  
15

16  
17 The Northwell COVID-19 Research Consortium: Stuart L. Cohen, MD<sup>1,2</sup>; Charlotte  
18 Kvasnovsky, MD, PhD, MPH<sup>2</sup>; Stephen C. Machnicki, MD FCCP<sup>2</sup>; Alex Makhnevich MD<sup>1,2</sup>;  
19 Prashant Malhotra, MD<sup>1,2</sup>; Lyndonna Marrast, MD, MPH<sup>1,2</sup>; Ramanak Mitra, MD<sup>2</sup>; Ernesto P.  
20 Molmenti, MD<sup>2</sup>; Sonali Narain, MBBS, MPH<sup>1,2</sup>; M. Wasif Saif MD, MBBS<sup>1,2</sup>; Sanjaya  
21 Satapathy, MD<sup>2</sup>; Shalin Shah, MD<sup>2</sup>  
22  
23

24 <sup>1</sup> Institute of Health Innovations and Outcome Research, Feinstein Institutes for Medical  
25 Research, Northwell Health, Manhasset, New York

26 <sup>2</sup> Donald and Barbara Zucker School of Medicine at Hofstra/Northwell, Northwell Health,  
27 Hempstead, New York

28 <sup>3</sup> Department of Information Services, Northwell Health, New Hyde Park, New York  
29  
30  
31

32 Contributorship Statement

33 Concept and design: EK, KC, JH, KD, ML, JC, SC, SM, AM, PM, LM, RM, EM, SN, WS, SS

34 Acquisition: KC, JH

35 Drafting of the manuscript: EK, KC, JC, SA, JJ

36 Critical revision of the manuscript for important intellectual content: all authors

37 Statistical analysis: KC, ML, CK

38 Obtained funding: KD

39 Administrative, technical or material support: KD, JC

40 Supervision: EK, ML, KD, JH, JC  
41  
42  
43  
44  
45

46 Corresponding author: Joseph Conigliaro, MD, MPH

47 2001 Marcus Avenue S160

48 Lake Success, NY 11042

49 jconigliaro@northwell.edu  
50  
51

52 2,761 words

53 5 tables/figure  
54  
55  
56  
57  
58  
59  
60

**Abstract (300/300 words)**

**Objective:** To describe the pattern of hydroxychloroquine use and examine the association between hydroxychloroquine use and clinical outcomes arising from changes in the U.S. Food and Drug Administration (FDA)'s recommendation during the COVID-19 pandemic.

**Design:** A retrospective cross-sectional analysis.

**Setting and Participants:** We included hospitalized adult patients at Northwell Health hospitals with confirmed COVID-19 infections between March 1, 2020 and May 11, 2020. We categorized changes in the FDA recommendation as pre-FDA approval (March 1-March 27, 2020), FDA approval (March 28-April 23, 2020), and FDA warning (April 24-May 11, 2020). The hydroxychloroquine treated group received at least one dose within 48 hours of hospital admission.

**Primary outcome:** A composite of intubation and inpatient death.

**Results:** The percentages of patients who were treated with hydroxychloroquine were 192/2202 (8.7%) pre-FDA approval, 2902/6741 (43.0%) FDA approval, and 176/1066 (16.5%) FDA warning period (p-value<0.001). Using propensity score-matching, there was a higher rate of the composite outcome among patients treated with hydroxychloroquine (49/192, 25.5%) compared to no hydroxychloroquine (66/384, 17.2%) in the pre-FDA approval period (p-value=0.03) but not in the FDA-approval period (25.5% vs 22.6%, p=0.08) or the FDA warning (21.0% vs 15.1%, p=0.11) periods. Coincidentally, there was an increase in number of COVID-19 patients and disease severity during the FDA approval period (24.1% during FDA approval versus 21.4% during pre-FDA approval period). Hydroxychloroquine use was associated with increased odds of the composite outcome during the pre-FDA approval period (OR=1.65 [1.09-2.51]) but not

1  
2  
3 during the FDA approval (OR=1.17 [0.99-1.39]) and FDA warning (OR=1.50 [0.94-2.39])  
4 periods.  
5  
6

7 **Conclusions:** Hydroxychloroquine use was associated with adverse clinical outcomes only  
8 during the pre-FDA approval period but not during the FDA-approval and warning periods, even  
9 after adjusting for concurrent changes in the percentage of COVID-19 patients treated with  
10 hydroxychloroquine and the number (and disease severity) of hospitalized patients with COVID-  
11 19 infections.  
12  
13  
14  
15  
16  
17  
18  
19  
20  
21  
22  
23  
24  
25  
26  
27  
28  
29  
30  
31  
32  
33  
34  
35  
36  
37  
38  
39  
40  
41  
42  
43  
44  
45  
46  
47  
48  
49  
50  
51  
52  
53  
54  
55  
56  
57  
58  
59  
60

### Strengths and limitations

- This study provides insights into how changes in FDA recommendations impact physicians' behaviors during a pandemic.
- The study utilizes data from a large integrated health system, which include a diverse population throughout New York City, Long Island, and Westchester County.
- This study uses propensity score-matching within each FDA recommendation, to ensure that patients admitted in the FDA approval period are not matched to patients in the pre-FDA approval or FDA warning period.
- Due to the observational study design, this study does not establish causal relationship between hydroxychloroquine treatment and outcomes.

## Introduction

Coronavirus Disease 2019 (COVID-19), which causes severe acute respiratory syndrome, has spread globally. One consequence has been the unprecedented number of intensive care unit (ICU) admissions requiring mechanical ventilation in many countries. The mortality of patients on mechanical ventilation has been reported to be 60-80% with an overall hospital mortality of 20-25% during the beginning of the pandemic.<sup>1,2</sup> More recent studies have shown lower inpatient mortality, but COVID-19 still causes significant morbidity and mortality.<sup>3,4</sup> As of November 11, 2020, over 53 million people have been infected with COVID-19 and 1.3 million deaths have been reported globally.<sup>5</sup> Although multiple vaccines are in preparation or have begun clinical testing, data on safety and efficacy required to immunize the general public is currently unavailable and may be months to years away. Therefore, the need to identify medications that are associated with slowed COVID-19 progression or decreased mortality remains urgent.

During the early months of the COVID-19 pandemic, hydroxychloroquine, a medication commonly used to prevent malaria infection and treat autoimmune diseases, gained global attention for its effectiveness in treating COVID-19 *in vitro*.<sup>6-11</sup> Hydroxychloroquine is found to reduce the entry of coronavirus into a cell through interference with the terminal glycosylation of angiotensin-converting enzyme 2 receptor, which inhibits viral replication.<sup>6,8</sup> Additionally, hydroxychloroquine has immunomodulatory activity, and may inhibit cytokine production and prevent the occurrence of cytokine storm.<sup>12</sup> Early studies examining the treatment of COVID-19 with hydroxychloroquine showed mixed results, with some studies showing no average benefit in outcomes, including intubation or inpatient mortality, but other studies showing worse outcomes.<sup>13-22</sup> A recent randomized clinical trial study examining the effects of

1  
2  
3 hydroxychloroquine has found no difference in clinical outcomes between patients treated with  
4  
5 and without hydroxychloroquine.<sup>23</sup>  
6

7  
8         However, no study has accounted for how changes in recommendations for  
9  
10 hydroxychloroquine by the United States Food and Drug Administration (FDA) affected  
11  
12 outcomes of patients treated for COVID-19. On March 28, 2020, the FDA issued an Emergency  
13  
14 Use Authorization for hydroxychloroquine in the treatment of COVID-19 infection. During this  
15  
16 time, there was also an increased number of hospitalized patients with COVID-19, which may  
17  
18 have resulted in changes in hospital capacity and disease severity.<sup>5</sup> Subsequently, on April 24,  
19  
20 2020, the FDA cautioned against using hydroxychloroquine for COVID-19 infection.<sup>24</sup> These  
21  
22 changes in the recommendation of hydroxychloroquine as a treatment for COVID-19 infection  
23  
24 may have impacted whether patients were treated with hydroxychloroquine for COVID-19.  
25  
26 These two events occurring concurrently could affect the association between  
27  
28 hydroxychloroquine and COVID-19 outcomes. Therefore, using data from one of the largest  
29  
30 healthcare systems in the United States, we described the pattern of hydroxychloroquine use over  
31  
32 time according to the FDA's position and examined the association between hydroxychloroquine  
33  
34 use and patients' clinical outcomes based on changes in FDA recommendation.  
35  
36  
37  
38  
39  
40  
41

## 42 **Methods**

### 43 *Setting*

44  
45  
46         This is a cross-sectional analysis of data from Northwell Health, the largest academic  
47  
48 healthcare system in New York. Northwell Health serves approximately 11 million patients  
49  
50 throughout Long Island, New York City, and Westchester County and has 23 affiliated  
51  
52 healthcare facilities, including 12 acute care hospitals. The Institutional Review Board for the  
53  
54  
55  
56  
57  
58  
59  
60

1  
2  
3 Feinstein Institutes for Medical Research at Northwell Health approved this case series as  
4  
5 minimal-risk research using data collected for routine clinical practice and waived the  
6  
7 requirement for informed consent.  
8  
9

### 10 11 12 *Data Source* 13

14  
15 Data for this study was obtained from the enterprise's inpatient electronic health record  
16  
17 (EHR; Sunrise Clinical Manager, Allscripts, Chicago, IL), which covers 12 of Northwell  
18  
19 Health's hospitals.  
20  
21

### 22 23 24 *Study Population* 25

26  
27 The study population included all adult patients (n=13,258), aged 18 years and older,  
28  
29 hospitalized at one of Northwell Health's 12 acute care hospitals between March 1, 2020 and  
30  
31 May 11, 2020 with a diagnosis of COVID-19 confirmed by a positive result on polymerase chain  
32  
33 reaction testing of a nasopharyngeal sample. For patients with multiple COVID-19 tests, they  
34  
35 were considered to have a confirmed COVID-19 infection if any of the repeated tests within the  
36  
37 same hospitalization returned positive. We excluded patients who died or were intubated within  
38  
39 one day of hospitalization because their clinical outcomes were likely predetermined by pre-  
40  
41 hospitalization factors. We also excluded patients who were discharged within one day of  
42  
43 admission. Patients who were admitted to the obstetrics service were excluded as all obstetrics  
44  
45 patients were screened for COVID-19 on their admission. For patients with multiple  
46  
47 hospitalizations for COVID-19, we used their first hospitalization with a confirmed diagnosis of  
48  
49 COVID-19. We excluded 3,249 patients who did not meet the inclusion and exclusion criteria.  
50  
51  
52  
53  
54  
55  
56  
57  
58  
59  
60

### *Exposure*

Patients were identified as treated with hydroxychloroquine if they received at least one dose within 48 hours of admission. The control group for this analysis consisted of patients who were not treated with hydroxychloroquine within 48 hours of admission. Patients who did not initially receive hydroxychloroquine within 48 hours but received the medication later in their hospitalization were kept in the control group. We excluded COVID-19 patients who were treated with azithromycin or a combination of hydroxychloroquine and azithromycin. We also excluded patients who were intubated prior to getting their first dose of hydroxychloroquine within 48 hours of admission.

### *Outcomes*

The primary outcome of interest was a composite outcome of time to intubation or time to inpatient death. Time until composite event was censored at time of discharge for patients who were discharged alive with no intubation during their hospitalization. The rationale for the combined primary outcome was twofold: 1) many patients who deteriorated clinically died without being intubated, often due to transition to palliative care; and 2) hospitalization stays for intubated COVID-19 patients have been very long, and many intubated COVID-19 patients at the time of the analyses may not ultimately survive. For a sensitivity analysis, we used death as the outcome. We tracked all patients who were not discharged or died until June 1, 2020.

### *Covariates*

We collected data on patients' demographic characteristics and comorbidities. Demographic characteristics included age, sex, race/ethnicity, and health insurance (commercial,



1  
2  
3 Medicaid, Medicare, other, and no insurance). We used patient-reported race and ethnicity  
4 information and categorized patients into one of five racial/ethnic groups: White, Black, Asian,  
5  
6 information and categorized patients into one of five racial/ethnic groups: White, Black, Asian,  
7  
8 Other/Multiracial, and Unknown/Declined. We also identified a subgroup of patients who  
9  
10 received immunomodulatory medications, including steroids (prednisone or  
11  
12 methylprednisolone), sarilumab, tocilizumab, anakinra, or colchicine, and included this  
13  
14 information as a covariate. We identified the presence of the following comorbidities by  
15  
16 *International Statistical Classification of Disease and Related Health Problems, Tenth Revision*  
17  
18 *(ICD-10)* coding: cancer, coronary artery disease, hypertension, asthma, chronic obstructive  
19  
20 pulmonary disease, diabetes, chronic liver disease, chronic kidney disease, and end stage renal  
21  
22 disease. We calculated the Charlson Comorbidity Index, which is an index that predicts the 10-  
23  
24 year survival of patients with multiple comorbidities, as a measure of total comorbidity burden.<sup>25</sup>  
25  
26 The only covariate with missing data was BMI, and we categorized the BMI group as not obese  
27  
28 (BMI less than 30kg/m<sup>2</sup>), obese (BMI greater than or equal to 30kg/m<sup>2</sup>), and missing BMI.  
29  
30

31  
32  
33 We categorized changes in FDA recommendation for hydroxychloroquine, into three  
34  
35 time periods: 1) pre-FDA approval (March 1-March 27, 2020); 2) FDA approval (March 28-  
36  
37 April 23, 2020); and 3) FDA warning (April 24-May 11, 2020).  
38  
39

### 40 41 42 *Statistical analysis*

43  
44 All analyses were performed using version 3.5.2 of the R Programming Language (R  
45  
46 Project for Statistical Computing, R Foundation, Vienna, Austria). We first performed chi-square  
47  
48 and 2-sample t-tests to compare patient characteristics treated with hydroxychloroquine to no  
49  
50 hydroxychloroquine (control).  
51  
52  
53  
54  
55  
56  
57  
58  
59  
60

1  
2  
3 We used propensity-score matching methods, 1:2 for the pre-FDA approval and the FDA  
4 warning periods and 1:1 for the FDA approval period, using the smaller group as a reference,  
5 within each period and applied the nearest-neighbor method to create a matched control sample.  
6  
7 The propensity-score matching was performed within each period so that patients admitted  
8 within the FDA approval period were not matched to patients in the pre-FDA approval or FDA  
9 warning periods, so as not to confound the effect of different FDA recommendations.  
10  
11  
12  
13  
14  
15  
16

17 We then took the following approach to conduct the analysis. We first performed logistic  
18 regressions to compare the propensity score-matched hydroxychloroquine group to the control  
19 group. For a time-to-event analysis, we used the Kaplan-Meier survival estimate and log-rank  
20 test. We examined the Kaplan-Meier survival curves for the treatment group compared to the  
21 control group, separated by the different FDA recommendation periods. If a patient was  
22 discharged alive without intubation, data was censored at the time of hospital discharge. Then,  
23 we used Cox proportional-hazard regression models to estimate the association between the  
24 propensity-matched treatment group to the control group with respect to end point free survival  
25 time. We used the Schoenfeld residuals to test the proportional hazard assumption in the Cox  
26 model.  
27  
28  
29  
30  
31  
32  
33  
34  
35  
36  
37  
38  
39  
40  
41

## 42 **Results**

### 43 *Characteristics of the cohort*

44  
45 From a cohort of 10,009 patients, 3,270 (32.7%) were treated with hydroxychloroquine,  
46 2,640 (26.4%) with neither hydroxychloroquine nor azithromycin, 1,289 (12.9%) with  
47 azithromycin only, and 2,810 (28.1%) with the combination hydroxychloroquine and  
48  
49  
50  
51  
52  
53  
54  
55  
56  
57  
58  
59  
60

1  
2  
3 azithromycin. There were differences in the number of patients treated with or without  
4 hydroxychloroquine and/or azithromycin by admission period (Figure 1).  
5  
6

7  
8 We found significant differences in the use of hydroxychloroquine and patient  
9 characteristics based on changes to FDA recommendation. Number and percentages of patients  
10 treated with hydroxychloroquine were 192/2202 (8.7%) pre-FDA approval, 2902/6741 (43.0%)  
11 during FDA approval, and 176/1066 (16.5%) during the FDA warning period (p-value<0.001).  
12 There was a significant increase in number of patients during the FDA approval period (March  
13 28-April 23). During the pre-FDA approval period, there were 2,202 patients admitted with  
14 COVID-19 infection, but in the following periods, the number of patients admitted with COVID-  
15 19 infections was 6,741 (FDA approval period) and 1,066 (FDA warning period). Throughout  
16 the study, and independent of FDA periods, there were differences in sociodemographic and  
17 clinical characteristics between the treatment group compared to the control group (Table 1).  
18 Higher percentage of patients who were younger (36.8% vs 32.5% were less than 60 years old),  
19 male (59.9% vs 53.4%), and had commercial insurance (31.0% vs 24.2%) were treated with  
20 hydroxychloroquine (p-values<0.001). Presence of comorbidity was associated with  
21 hydroxychloroquine use (all p-values<0.05), except for asthma and diabetes, and chronic kidney  
22 disease.  
23  
24  
25  
26  
27  
28  
29  
30  
31  
32  
33  
34  
35  
36  
37  
38  
39  
40  
41

42 Hydroxychloroquine groups (13.4%) had higher rates of intubation compared to the  
43 control group (7.0%) (p-value<0.001). Inpatient mortality was 20.2% for hydroxychloroquine  
44 versus 18.3% for no hydroxychloroquine treatment (p-value=0.01). A significantly higher  
45 percentage of patients treated with hydroxychloroquine (23.4%) reached the composite outcome  
46 compared to the control group (20.4%) (p-value=0.007). A higher percentage of patients on  
47  
48  
49  
50  
51  
52  
53  
54  
55  
56  
57  
58  
59  
60

1  
2  
3 hydroxychloroquine (52.8%) were treated concurrently with immunomodulatory medications  
4 compared to the control group (24.7%) (p-value<0.001).  
5  
6

7  
8 After propensity-score matching within each time period, sociodemographic  
9 characteristics and comorbidity were similar between hydroxychloroquine and no  
10 hydroxychloroquine group (Table 2). There were 576 patients in the pre-FDA approval period,  
11 2812 patients in the FDA approval period, and 528 FDA warning period. There was a higher  
12 composite outcome among patients treated with hydroxychloroquine (25.5%) compared to no  
13 hydroxychloroquine (17.2%) during the pre-FDA approval period (p-value=0.03) but no  
14 difference in the number of composite outcomes between hydroxychloroquine and no  
15 hydroxychloroquine groups in the FDA-approval period (25.5%, vs 22.6% p=0.08) or the FDA  
16 warning period (21.0 vs 15.1% %, p=0.11) (Table 3). In the univariate analysis,  
17 hydroxychloroquine use was associated with increased odds of the composite outcome during the  
18 pre-FDA approval period (OR=1.65 [1.09-2.51]) but there was no association during the FDA  
19 approval (OR=1.17 [0.99-1.39]) as well as the FDA warning period (OR=1.50 [0.94-2.39]).  
20  
21  
22  
23  
24  
25  
26  
27  
28  
29  
30  
31  
32  
33  
34  
35  
36  
37

### 38 *Time-to event analysis*

39  
40 Figure 2 shows the Kaplan-Meier curves of freedom from the composite end point of  
41 intubation and inpatient mortality during the pre-FDA approval period, the FDA approval period,  
42 or the FDA warning period. The cox proportional-hazard regression models showed  
43 hydroxychloroquine use was associated with the composite outcome of intubation and inpatient  
44 mortality during the pre-FDA approval (hazard ratio=1.70 [1.17-2.48]) and the FDA warning  
45 (hazard ratio=1.53 [1.00-2.34]) period but not during the FDA approval period (hazard  
46  
47  
48  
49  
50  
51  
52  
53  
54  
55  
56  
57  
58  
59  
60

1  
2  
3 ratio=1.03 [0.88-1.20]) (Table 3). The proportional hazards assumption was met in the cox  
4  
5 regression model.  
6  
7  
8  
9  
10

## 11 **Discussion**

12  
13  
14 In our study, while there were changes in percentage of COVID-19 patients treated with  
15 hydroxychloroquine with FDA recommendations, there was also a fluctuation of the number of  
16 hospitalized patients with COVID-19 infections during the FDA approval period.  
17  
18 Hydroxychloroquine treatment was associated with increased composite outcome of intubation  
19 or death during pre-FDA approval period but not during FDA approval or FDA warning period.  
20  
21 The overall association of hydroxychloroquine treatment among COVID-19 patients in our  
22 cohort was similar to previous studies showing no association between the treatment and primary  
23 end point of intubation or death.<sup>13,14</sup>  
24  
25  
26  
27  
28  
29  
30  
31  
32

33 Although not captured in our study, hospitals during the FDA approval period had to  
34 manage sudden increases in critically ill patients. As hospitals were reaching their maximum  
35 capacity, coordinated efforts were made to ensure that there were adequate ventilators for  
36 patients with pulmonary complications, goals of care discussions for patients with poor  
37 prognosis, and an increase in ambulatory management to ensure medical care for all patients.<sup>26-28</sup>  
38  
39 Therefore, patients who were admitted during this period may have had more severe disease,  
40 including hypoxia, requiring ventilators. This hypothesis is also consistent with the higher  
41 proportions of patients experiencing the composite outcome during this period. There was also  
42 an increased use of immunomodulators, which were more often used for patients with more  
43 complications, including acute respiratory distress syndrome, acute kidney injury, thrombosis,  
44  
45  
46  
47  
48  
49  
50  
51  
52  
53  
54  
55  
56  
57  
58  
59  
60

1  
2  
3 etc.<sup>1,29,30</sup> Therefore, regardless of whether they were being treated with hydroxychloroquine or  
4  
5 not, patients admitted during the FDA approval period had overall worse outcomes compared to  
6  
7 patients admitted during other periods. Because of such differences in patient disease severity  
8  
9 and hospital settings, we used propensity-score matching of patients within each period so that  
10  
11 the patients treated in the pre-FDA approval or FDA warning periods were not matched with  
12  
13 patients treated in the FDA approval period.  
14  
15

16  
17 The lack of efficacy of hydroxychloroquine could be attributed to the severity of disease  
18  
19 among patients receiving medication. The hypothesized mechanism of action of  
20  
21 hydroxychloroquine is that it prevents the virus from entering cells and blocks viral replication.<sup>6-</sup>  
22  
23 <sup>8</sup> These patients were hospitalized because of a severe course of disease, and therefore it is likely  
24  
25 that viral replication was already high when hydroxychloroquine was administered. This may be  
26  
27 particularly true for patients who were hospitalized during the FDA approved period because  
28  
29 hospitals had a high number of COVID-19 patients requiring inpatient care. Also,  
30  
31 hydroxychloroquine may have been administered to more severely ill patients and subsequently  
32  
33 was associated with higher risk of intubation and/or inpatient mortality. We addressed this by  
34  
35 propensity-score matching patients treated with hydroxychloroquine to no hydroxychloroquine.  
36  
37 Of note, higher doses of hydroxychloroquine have been associated with adverse intermediate  
38  
39 outcomes, including QTc prolongation, in another study.<sup>31</sup>  
40  
41  
42  
43

44  
45 This study has several limitations. Due to the observational study design, this study does  
46  
47 not establish causal relationships between medication treatment and outcomes. Also, this study is  
48  
49 limited to the inpatient setting, therefore the study findings are not generalizable to outpatient or  
50  
51 community settings. Though we did attempt to adjust for covariates, it is possible that the  
52  
53 severity of illness and precise timing of treatment also may have influenced the association of  
54  
55  
56  
57  
58  
59  
60

1  
2  
3 these medications with the outcome. There might be a subset of patients who were taking  
4 hydroxychloroquine prescribed by their ambulatory providers prior to their hospitalization. It is  
5 possible that some patients in the no hydroxychloroquine group were taking the medications or  
6 already had completed their 5-day course prior to hospitalization. There was a subset of patients  
7 in the control group who were treated with hydroxychloroquine or azithromycin after 48 hours  
8 because of their disease progression. The changes in the FDA recommendations probably also  
9 caused some patients admitted during the pre-FDA approval period to be treated with  
10 hydroxychloroquine during their prolonged hospitalizations. This could result in bias toward the  
11 null, that is, erroneously concluding no difference between hydroxychloroquine and control  
12 (Type II error). The strength of this study, however, is the inclusion of a large, diverse  
13 population, including racial and ethnic minorities, extending the generalizability of our study.  
14  
15  
16  
17  
18  
19  
20  
21  
22  
23  
24  
25  
26  
27

28         Regardless of FDA's recommendation for the drug, we did not observe any beneficial  
29 association of hydroxychloroquine use throughout the study period. In addition to changes in the  
30 FDA recommendation, this study addresses changes in case mix due to changes in number of  
31 COVID-19 patients being hospitalized. This study further confirms that hydroxychloroquine  
32 does not alter the clinical course among patients with COVID-19 infections in the inpatient  
33 setting where patients have more severe diseases. Additionally, recent evidence suggests that  
34 hydroxychloroquine treatment does not alter clinical outcomes among patients with milder  
35 symptoms and is not effective as pharmacologic prophylaxis.<sup>32,33</sup> On June 15, 2020, the FDA  
36 revoked the Emergency Use Authorization for hydroxychloroquine in the treatment of COVID-  
37 19 infection and this will further decrease the number of COVID-19 patients being treated with  
38 hydroxychloroquine.<sup>34</sup> These study results should not be used as guidance on whether or not to  
39 treat COVID-19 patients with or without hydroxychloroquine due to its observational design.  
40  
41  
42  
43  
44  
45  
46  
47  
48  
49  
50  
51  
52  
53  
54  
55  
56  
57  
58  
59  
60

### **Data Availability Statement**

The data that support the findings of this study are available on request from [COVID19@northwell.edu](mailto:COVID19@northwell.edu). The data are not publicly available due to restrictions as it could compromise the privacy of research participants.

### **Conflict of Interest Disclosures**

The authors report no real or apparent conflicts of interest.

### **Funding/Support**

This work was supported by grants R24AG064191 from the National Institute on Aging of the National Institutes of Health and R01LM012836 from the National Library of Medicine of the National Institutes of Health.

### **Role of the Funder/Sponsor**

The funders had no role in the design and conduct of the study; collection, management, analysis, and interpretation of the data; preparation, review, or approval of the manuscript; and decision to submit the manuscript for publication. The views expressed in this paper are those of the authors and do not represent the views of the National Institutes of Health, the United States Department of Health and Human Services, or any other government entity.

### **Patient and Public Involvement**



1  
2  
3 Patients or the public were not involved in the design, or conduct, or reporting, or dissemination  
4 plans of our research.  
5  
6  
7  
8  
9

## 10 **Figures**

11  
12 Figure 1. Number of COVID-19 patients treated with different medications  
13

14 Figure 2. Kaplan-Meier curve showing freedom from composite end point of intubation or  
15 inpatient mortality by different time period  
16  
17  
18  
19  
20  
21  
22  
23  
24  
25  
26  
27  
28  
29  
30  
31  
32  
33  
34  
35  
36  
37  
38  
39  
40  
41  
42  
43  
44  
45  
46  
47  
48  
49  
50  
51  
52  
53  
54  
55  
56  
57  
58  
59  
60

## References

1. Wu C, Chen X, Cai Y, et al. Risk Factors Associated With Acute Respiratory Distress Syndrome and Death in Patients With Coronavirus Disease 2019 Pneumonia in Wuhan, China. *JAMA Intern Med.* 2020.
2. Richardson S, Hirsch JS, Narasimhan M, et al. Presenting Characteristics, Comorbidities, and Outcomes Among 5700 Patients Hospitalized With COVID-19 in the New York City Area. *JAMA.* 2020.
3. Angeli F, Bachetti T, Maugeri Study G. Temporal changes in co-morbidities and mortality in patients hospitalized for COVID-19 in Italy. *Eur J Intern Med.* 2020.
4. Horwitz LI, Jones SA, Cerfolio RJ, et al. Trends in COVID-19 Risk-Adjusted Mortality Rates. *J Hosp Med.* 2020.
5. The Center for Systems Science and Engineering at Johns Hopkins University. COVID-19 dashboard. <https://www.arcgis.com/apps/opsdashboard/index.html#/bda7594740fd40299423467b48e9ecf6>. Published 2020. Accessed June 10, 2020.
6. Yao X, Ye F, Zhang M, et al. In Vitro Antiviral Activity and Projection of Optimized Dosing Design of Hydroxychloroquine for the Treatment of Severe Acute Respiratory Syndrome Coronavirus 2 (SARS-CoV-2). *Clin Infect Dis.* 2020.
7. Wang M, Cao R, Zhang L, et al. Remdesivir and chloroquine effectively inhibit the recently emerged novel coronavirus (2019-nCoV) in vitro. *Cell Res.* 2020;30(3):269-271.
8. Vincent MJ, Bergeron E, Benjannet S, et al. Chloroquine is a potent inhibitor of SARS coronavirus infection and spread. *Virol J.* 2005;2:69.
9. Liu J, Cao R, Xu M, et al. Hydroxychloroquine, a less toxic derivative of chloroquine, is effective in inhibiting SARS-CoV-2 infection in vitro. *Cell Discov.* 2020;6:16.
10. Andreani J, Le Bideau M, Dufloy I, et al. In vitro testing of combined hydroxychloroquine and azithromycin on SARS-CoV-2 shows synergistic effect. *Microb Pathog.* 2020;145:104228.
11. Grassin-Delyle S, Salvator H, Brollo M, et al. Chloroquine inhibits the release of inflammatory cytokines by human lung explants. *Clin Infect Dis.* 2020.
12. Schrezenmeier E, Dorner T. Mechanisms of action of hydroxychloroquine and chloroquine: implications for rheumatology. *Nat Rev Rheumatol.* 2020;16(3):155-166.
13. Geleris J, Sun Y, Platt J, et al. Observational Study of Hydroxychloroquine in Hospitalized Patients with Covid-19. *N Engl J Med.* 2020.
14. Rosenberg ES, Dufort EM, Udo T, et al. Association of Treatment With Hydroxychloroquine or Azithromycin With In-Hospital Mortality in Patients With COVID-19 in New York State. *JAMA.* 2020.
15. Tang W, Cao Z, Han M, et al. Hydroxychloroquine in patients with mainly mild to moderate coronavirus disease 2019: open label, randomised controlled trial. *BMJ.* 2020;369:m1849.
16. Molina JM, Delaugerre C, Le Goff J, et al. No evidence of rapid antiviral clearance or clinical benefit with the combination of hydroxychloroquine and azithromycin in patients with severe COVID-19 infection. *Med Mal Infect.* 2020;50(4):384.
17. Magagnoli J, Narendran S, Pereira F, et al. Outcomes of hydroxychloroquine usage in United States veterans hospitalized with Covid-19. *medRxiv.* 2020.
18. Fiolet T, Guihur A, Rebeaud ME, Mulot M, Peiffer-Smadja N, Mahamat-Saleh Y. Effect of hydroxychloroquine with or without azithromycin on the mortality of coronavirus

- disease 2019 (COVID-19) patients: a systematic review and meta-analysis. *Clin Microbiol Infect.* 2020.
19. Gautret P, Lagier JC, Parola P, et al. Hydroxychloroquine and azithromycin as a treatment of COVID-19: results of an open-label non-randomized clinical trial. *Int J Antimicrob Agents.* 2020;105949.
  20. Gao J, Tian Z, Yang X. Breakthrough: Chloroquine phosphate has shown apparent efficacy in treatment of COVID-19 associated pneumonia in clinical studies. *Biosci Trends.* 2020;14(1):72-73.
  21. Chen Z, Hu J, Zhang Z, et al. Efficacy of hydroxychloroquine in patients with COVID-19: results of a randomized clinical trial. *medRxiv.* 2020.
  22. Arshad S, Kilgore P, Chaudhry ZS, et al. Treatment with hydroxychloroquine, azithromycin, and combination in patients hospitalized with COVID-19. *Int J Infect Dis.* 2020;97:396-403.
  23. Self WH, Semler MW, Leither LM, et al. Effect of Hydroxychloroquine on Clinical Status at 14 Days in Hospitalized Patients With COVID-19: A Randomized Clinical Trial. *JAMA.* 2020.
  24. Hydroxychloroquine or Chloroquine for COVID-19: Drug Safety Communication - FDA Cautions Against Use Outside of the Hospital Setting or a Clinical Trial Due to Risk of Heart Rhythm Problems. U.S. Food & Drug Administration <https://www.fda.gov/safety/medical-product-safety-information/hydroxychloroquine-or-chloroquine-covid-19-drug-safety-communication-fda-cautions-against-use>. Accessed May 15, 2020.
  25. Charlson ME, Pompei P, Ales KL, MacKenzie CR. A new method of classifying prognostic comorbidity in longitudinal studies: development and validation. *J Chronic Dis.* 1987;40(5):373-383.
  26. Curtis JR, Kross EK, Stapleton RD. The Importance of Addressing Advance Care Planning and Decisions About Do-Not-Resuscitate Orders During Novel Coronavirus 2019 (COVID-19). *JAMA.* 2020.
  27. Greenhalgh T, Koh GCH, Car J. Covid-19: a remote assessment in primary care. *BMJ.* 2020;368:m1182.
  28. White DB, Lo B. A Framework for Rationing Ventilators and Critical Care Beds During the COVID-19 Pandemic. *JAMA.* 2020.
  29. Hirsch JS, Ng JH, Ross DW, et al. Acute Kidney Injury in Patients Hospitalized with Covid-19. *Kidney Int.* 2020.
  30. Connors JM, Levy JH. COVID-19 and its implications for thrombosis and anticoagulation. *Blood.* 2020;135(23):2033-2040.
  31. Borba MGS, Val FFA, Sampaio VS, et al. Effect of High vs Low Doses of Chloroquine Diphosphate as Adjunctive Therapy for Patients Hospitalized With Severe Acute Respiratory Syndrome Coronavirus 2 (SARS-CoV-2) Infection: A Randomized Clinical Trial. *JAMA Netw Open.* 2020;3(4):e208857.
  32. Abella BS, Jolkovsky EL, Biney BT, et al. Efficacy and Safety of Hydroxychloroquine vs Placebo for Pre-exposure SARS-CoV-2 Prophylaxis Among Health Care Workers: A Randomized Clinical Trial. *JAMA Intern Med.* 2020.
  33. Boulware DR, Pullen MF, Bangdiwala AS, et al. A Randomized Trial of Hydroxychloroquine as Postexposure Prophylaxis for Covid-19. *N Engl J Med.* 2020;383(6):517-525.

- 1  
2  
3 34. Coronavirus (COVID-19) Update: FDA Revokes Emergency Use Authorization for  
4 Chloroquine and Hydroxychloroquine. U.S. Foods and Drug Administration.  
5 [https://www.fda.gov/news-events/press-announcements/coronavirus-covid-19-update-](https://www.fda.gov/news-events/press-announcements/coronavirus-covid-19-update-fda-revokes-emergency-use-authorization-chloroquine-and)  
6 [fda-revokes-emergency-use-authorization-chloroquine-and](https://www.fda.gov/news-events/press-announcements/coronavirus-covid-19-update-fda-revokes-emergency-use-authorization-chloroquine-and). Published June 15, 2020.  
7 Accessed June 20, 2020.  
8  
9  
10  
11  
12  
13  
14  
15  
16  
17  
18  
19  
20  
21  
22  
23  
24  
25  
26  
27  
28  
29  
30  
31  
32  
33  
34  
35  
36  
37  
38  
39  
40  
41  
42  
43  
44  
45  
46  
47  
48  
49  
50  
51  
52  
53  
54  
55  
56  
57  
58  
59  
60

Table 1. Patient characteristics before propensity-score matching, number (percentage) for categorical variable and mean (standard deviation) for continuous variable

|                                         | All<br>(n=10,009) | HCQ<br>(n=3,270) | No HCQ<br>(n=2,640) | P-value* |
|-----------------------------------------|-------------------|------------------|---------------------|----------|
| <b>Sociodemographic characteristics</b> |                   |                  |                     |          |
| Age at admission, mean (SD)             | 64.99 (16.35)     | 64.29 (15.58)    | 66.87 (17.73)       | <0.001   |
| Age group                               |                   |                  |                     | <0.001   |
| 18-49                                   | 1747 (17.5)       | 558 (17.1)       | 434 (16.4)          |          |
| 50-59                                   | 1863 (18.6)       | 645 (19.7)       | 425 (16.1)          |          |
| 60-69                                   | 2277 (22.7)       | 816 (25.0)       | 530 (20.1)          |          |
| 70-79                                   | 2046 (20.4)       | 671 (20.5)       | 518 (19.6)          |          |
| 80+                                     | 2076 (20.7)       | 580 (17.7)       | 733 (27.8)          |          |
| Male                                    | 5847 (58.4)       | 1959 (59.9)      | 1411 (53.4)         | <0.001   |
| Race                                    |                   |                  |                     | <0.001   |
| White                                   | 3923 (39.2)       | 1151 (35.2)      | 1182 (44.8)         |          |
| Black                                   | 2104 (21.0)       | 632 (19.3)       | 581 (22.0)          |          |
| Asian                                   | 849 (8.5)         | 327 (10.0)       | 236 (8.9)           |          |
| Other/Multiracial                       | 2648 (26.5)       | 958 (29.3)       | 540 (20.5)          |          |
| Unknown                                 | 485 (4.8)         | 202 (6.2)        | 101 (3.8)           |          |
| Health insurance                        |                   |                  |                     | <0.001   |
| Commercial                              | 2947 (29.4)       | 1013 (31.0)      | 638 (24.2)          |          |
| Medicaid                                | 2041 (20.4)       | 712 (21.8)       | 488 (18.5)          |          |
| Medicare                                | 4754 (47.5)       | 1431 (43.8)      | 1453 (55.0)         |          |
| Other                                   | 133 (1.3)         | 46 (1.4)         | 45 (1.7)            |          |
| No insurance                            | 134 (1.3)         | 68 (2.1)         | 16 (0.6)            |          |
| <b>Comorbidity</b>                      |                   |                  |                     |          |
| Cancer                                  | 832 (8.3)         | 238 (7.3)        | 278 (10.5)          | <0.001   |
| Coronary artery disease                 | 1339 (13.4)       | 399 (12.2)       | 429 (16.2)          | <0.001   |
| Hypertension                            | 6073 (60.7)       | 1973 (60.3)      | 1673 (63.4)         | 0.02     |
| Peripheral artery/vascular disease      | 282 (2.8)         | 81 (2.5)         | 100 (3.8)           | 0.005    |
| Asthma                                  | 842 (8.4)         | 271 (8.3)        | 198 (7.5)           | 0.29     |
| Chronic obstructive pulmonary disease   | 639 (6.4)         | 168 (5.1)        | 174 (6.6)           | 0.02     |
| Diabetes                                | 3624 (36.2)       | 1233 (37.7)      | 945 (35.8)          | 0.14     |
| Chronic liver disease                   | 298 (3.0)         | 74 (2.3)         | 110 (4.2)           | <0.001   |
| Chronic kidney disease                  | 507 (5.1)         | 155 (4.7)        | 152 (5.8)           | 0.09     |
| End stage renal disease                 | 461 (4.6)         | 144 (4.4)        | 168 (6.4)           | 0.001    |
| Charlson Comorbidity Index, mean SD     | 4.89 (3.58)       | 4.56 (3.38)      | 5.74 (3.77)         | <0.001   |
| Obesity                                 |                   |                  |                     | <0.001   |
| Obese                                   | 2810 (28.1)       | 1001 (30.6)      | 570 (21.6)          |          |
| Not obese                               | 4632 (46.3)       | 1483 (45.4)      | 1296 (49.1)         |          |
| Missing BMI                             | 2567 (25.6)       | 786 (24.0)       | 774 (29.3)          |          |
| BMI, mean (SD)                          | 29.23 (7.06)      | 29.66 (7.04)     | 28.13 (7.14)        | <0.001   |

1  
2  
3  
4  
5  
6  
7  
8  
9  
10  
11  
12  
13  
14  
15  
16  
17  
18  
19  
20  
21  
22  
23  
24  
25  
26  
27  
28  
29  
30  
31  
32  
33  
34  
35  
36  
37  
38  
39  
40  
41  
42  
43  
44  
45  
46  
47  
48  
49  
50  
51  
52  
53  
54  
55  
56  
57  
58  
59  
60**Clinical outcomes**

|                           |             |             |             |        |
|---------------------------|-------------|-------------|-------------|--------|
| Admission week            |             |             |             | <0.001 |
| Pre-FDA approval          | 2202 (22.0) | 192 (5.9)   | 496 (18.8)  |        |
| FDA approval              | 6741 (67.3) | 2902 (88.7) | 1406 (53.3) |        |
| FDA warning               | 1066 (10.7) | 176 (5.4)   | 738 (28.0)  |        |
| Length of stay, mean (SD) | 9.51 (9.60) | 9.56 (9.14) | 8.80 (9.27) | 0.001  |
| Immunomodulator use       | 4183 (41.8) | 1727 (52.8) | 651 (24.7)  | <0.001 |
| ICU stay                  | 1985 (19.8) | 583 (17.8)  | 426 (16.1)  | 0.09   |
| Mechanical ventilation    | 1314 (13.1) | 437 (13.4)  | 186 (7.0)   | <0.001 |
| Inpatient mortality       | 1983 (19.8) | 660 (20.2)  | 482 (18.3)  | 0.01   |
| Composite Outcome         | 2413 (24.1) | 764 (23.4)  | 538 (20.4)  | 0.007  |

\* Comparing hydroxychloroquine group to no treatment group

Table 2. Patient characteristics after propensity-score matching, number (percentage) for categorical variable and mean (standard deviation) for continuous variable

|                                             | Pre-FDA approval |                   |              |       | FDA approval    |                    |              |       | FDA warning    |                   |              |       |
|---------------------------------------------|------------------|-------------------|--------------|-------|-----------------|--------------------|--------------|-------|----------------|-------------------|--------------|-------|
|                                             | HCQ<br>(n=192)   | No HCQ<br>(n=384) | P-<br>value* | SMD   | HCQ<br>(n=1406) | No HCQ<br>(n=1406) | P-<br>value* | SMD   | HCQ<br>(n=176) | No HCQ<br>(n=352) | P-<br>value* | SMD   |
| <b>Sociodemographic characteristics</b>     |                  |                   |              |       |                 |                    |              |       |                |                   |              |       |
| Age at admission,<br>mean (SD)              | 61.1 (15.8)      | 62.8 (17.2)       | 0.26         | 0.101 | 67.8 (15.8)     | 67.3 (17.6)        | 0.42         | 0.03  | 66.2<br>(16.2) | 66.3 (17.6)       | 0.94         | 0.007 |
| Male                                        | 109 (56.8)       | 218 (56.8)        | 1.00         | 0.01  | 740 (52.6)      | 765 (54.4)         | 0.36         | 0.036 | 92 (52.3)      | 194 (55.1)        | 0.60         | 0.057 |
| Race                                        |                  |                   | 0.68         | 0.134 |                 |                    | 1.00         | 0.013 |                |                   | 0.99         | 0.05  |
| White                                       | 91 (47.4)        | 180 (46.9)        |              |       | 610 (43.4)      | 612 (43.5)         |              |       | 65 (36.9)      | 136 (38.6)        |              |       |
| Black                                       | 35 (18.2)        | 86 (22.4)         |              |       | 306 (21.8)      | 302 (21.5)         |              |       | 37 (21.0)      | 69 (19.6)         |              |       |
| Asian                                       | 17 (8.9)         | 37 (9.6)          |              |       | 143 (10.2)      | 143 (10.2)         |              |       | 12 (6.8)       | 25 (7.1)          |              |       |
| Other/Multiracial                           | 44 (22.9)        | 72 (18.8)         |              |       | 297 (21.1)      | 296 (21.1)         |              |       | 53 (30.1)      | 106 (30.1)        |              |       |
| Unknown                                     | 5 (2.6)          | 9 (2.3)           |              |       | 50 (3.6)        | 53 (3.8)           |              |       | 9 (5.1)        | 16 (4.5)          |              |       |
| Health insurance                            |                  |                   | 0.02         | 0.257 |                 |                    | 0.90         | 0.039 |                |                   | 1.00         | 0.036 |
| Commercial                                  | 91 (47.4)        | 134 (34.9)        |              |       | 306 (21.8)      | 321 (22.8)         |              |       | 44 (25.0)      | 92 (26.1)         |              |       |
| Medicaid                                    | 30 (15.6)        | 72 (18.8)         |              |       | 246 (17.5)      | 249 (17.7)         |              |       | 31 (17.6)      | 62 (17.6)         |              |       |
| Medicare                                    | 71 (37.0)        | 178 (46.4)        |              |       | 819 (58.3)      | 805 (57.3)         |              |       | 92 (52.3)      | 182 (51.7)        |              |       |
| Other                                       | 0 (0.0)          | 0 (0.0)           |              |       | 27 (1.9)        | 22 (1.6)           |              |       | 6 (3.4)        | 11 (3.1)          |              |       |
| No insurance                                | 0 (0.0)          | 0 (0.0)           |              |       | 8 (0.6)         | 9 (0.6)            |              |       | 3 (1.7)        | 5 (1.4)           |              |       |
| <b>Comorbidity</b>                          |                  |                   |              |       |                 |                    |              |       |                |                   |              |       |
| Cancer                                      | 10 (5.2)         | 25 (6.5)          | 0.67         | 0.055 | 134 (9.5)       | 151 (10.7)         | 0.32         | 0.04  | 16 (9.1)       | 30 (8.5)          | 0.96         | 0.02  |
| Coronary artery<br>disease                  | 23 (12.0)        | 56 (14.6)         | 0.47         | 0.077 | 218 (15.5)      | 222 (15.8)         | 0.88         | 0.008 | 27 (15.3)      | 53 (15.1)         | 1.00         | 0.008 |
| Hypertension                                | 109 (56.8)       | 237 (61.7)        | 0.29         | 0.101 | 915 (65.1)      | 884 (62.9)         | 0.24         | 0.046 | 107 (60.8)     | 205 (58.2)        | 0.64         | 0.052 |
| Peripheral<br>artery/vascular<br>disease    | 7 (3.6)          | 13 (3.4)          | 1.00         | 0.014 | 48 (3.4)        | 42 (3.0)           | 0.59         | 0.024 | 6 (3.4)        | 6 (1.7)           | 0.35         | 0.108 |
| Asthma                                      | 24 (12.5)        | 35 (9.1)          | 0.26         | 0.109 | 88 (6.3)        | 100 (7.1)          | 0.41         | 0.034 | 17 (9.7)       | 32 (9.1)          | 0.96         | 0.019 |
| Chronic<br>obstructive<br>pulmonary disease | 9 (4.7)          | 23 (6.0)          | 0.65         | 0.058 | 83 (5.9)        | 87 (6.2)           | 0.81         | 0.012 | 14 (8.0)       | 29 (8.2)          | 1.00         | 0.01  |
| Diabetes                                    | 70 (36.5)        | 138 (35.9)        | 0.98         | 0.011 | 515 (36.6)      | 508 (36.1)         | 0.81         | 0.01  | 68 (38.6)      | 131 (37.2)        | 0.82         | 0.029 |
| Chronic liver<br>disease                    | 7 (3.6)          | 15 (3.9)          | 1.00         | 0.014 | 47 (3.3)        | 56 (4.0)           | 0.42         | 0.034 | 7 (4.0)        | 19 (5.4)          | 0.62         | 0.067 |
| Chronic kidney<br>disease                   | 11 (5.7)         | 25 (6.5)          | 0.86         | 0.033 | 84 (6.0)        | 80 (5.7)           | 0.81         | 0.012 | 8 (4.5)        | 17 (4.8)          | 1.00         | 0.013 |

|    |                          |             |             |       |       |             |             |       |       |           |             |       |       |
|----|--------------------------|-------------|-------------|-------|-------|-------------|-------------|-------|-------|-----------|-------------|-------|-------|
| 1  |                          |             |             |       |       |             |             |       |       |           |             |       |       |
| 2  |                          |             |             |       |       |             |             |       |       |           |             |       |       |
| 3  | End stage renal          |             |             |       |       |             |             |       |       |           |             |       | <0.0  |
| 4  | disease                  | 12 (6.2)    | 27 (7.0)    | 0.86  | 0.031 | 99 (7.0)    | 101 (7.2)   | 0.94  | 0.006 | 4 (2.3)   | 8 (2.3)     | 1.00  | 01    |
| 5  | Charlson                 |             |             |       |       |             |             |       |       |           |             |       |       |
| 6  | Comorbidity Index,       |             |             |       |       |             |             |       |       | 5.03      |             |       |       |
| 7  | mean SD                  | 4.23 (3.19) | 4.73 (3.32) | 0.09  | 0.152 | 5.72 (3.75) | 5.69 (3.73) | 0.84  | 0.008 | (3.23)    | 5.01 (3.42) | 0.96  | 0.005 |
| 8  | Obesity                  |             |             | 0.08  | 0.198 |             |             | 0.84  | 0.022 |           |             | 0.96  | 0.027 |
| 9  | Obese                    | 76 (39.6)   | 116 (30.2)  |       |       | 289 (20.6)  | 292 (20.8)  |       |       | 50 (28.4) | 98 (27.8)   |       |       |
| 10 | Not obese                | 69 (35.9)   | 160 (41.7)  |       |       | 678 (48.2)  | 663 (47.2)  |       |       | 84 (47.7) | 166 (47.2)  |       |       |
| 11 | Missing BMI              | 47 (24.5)   | 108 (28.1)  |       |       | 439 (31.2)  | 451 (32.1)  |       |       | 42 (23.9) | 88 (25.0)   |       |       |
| 12 | <b>Clinical outcomes</b> |             |             |       |       |             |             |       |       |           |             |       |       |
| 13 | Length of stay, mean     | 10.88       | 10.48       |       |       |             |             | <0.00 |       | 8.67      |             |       |       |
| 14 | (SD)                     | (11.20)     | (11.79)     | 0.70  | 0.035 | 9.29 (8.66) | 7.75 (7.82) | 1     | 0.187 | (7.55)    | 8.28 (7.40) | 0.57  | 0.053 |
| 15 | Mechanical               |             |             |       |       |             |             | <0.00 |       |           |             |       |       |
| 16 | ventilation              | 33 (17.2)   | 29 (7.6)    | 0.001 | 0.296 | 168 (11.9)  | 85 (6.0)    | 1     | 0.207 | 26 (14.8) | 25 (7.1)    | 0.008 | 0.248 |
| 17 | Inpatient mortality      | 31 (16.1)   | 55 (14.3)   | 0.32  | 0.272 | 318 (22.6)  | 294 (20.9)  | 0.32  | 0.086 | 32 (18.2) | 46 (13.1)   | 1.00  | 0.079 |
| 18 | Composite Outcome        | 49 (25.5)   | 66 (17.2)   | 0.03  | 0.204 | 359 (25.5)  | 318 (22.6)  | 0.08  | 0.068 | 37 (21.0) | 53 (15.1)   | 0.11  | 0.156 |

\* Comparing hydroxychloroquine group to no treatment group

SMD=Standardized mean difference



Table 3. Association between hydroxychloroquine use and the composite end point in the crude analysis and propensity-score matched analysis

| Analysis                                                                  | Results           | P-value* |
|---------------------------------------------------------------------------|-------------------|----------|
| Composite outcome among patients at risk, n (%)                           |                   |          |
| Before propensity score matching                                          |                   |          |
| All periods                                                               |                   |          |
| Overall                                                                   | 2080/10009 (23.9) | -        |
| Hydroxychloroquine                                                        | 764/3270 (23.4)   | 0.007    |
| No HCQ                                                                    | 538/2640 (20.4)   |          |
| After propensity score matching                                           |                   |          |
| Pre-FDA approval                                                          |                   |          |
| Hydroxychloroquine                                                        | 49/192 (25.5)     | 0.03     |
| No HCQ                                                                    | 66/384 (17.2)     |          |
| FDA approval                                                              |                   |          |
| Hydroxychloroquine                                                        | 359/1406 (25.5)   | 0.08     |
| No HCQ                                                                    | 318/1406 (22.6)   |          |
| FDA warning                                                               |                   |          |
| Hydroxychloroquine                                                        | 37/176 (21.0)     | 0.11     |
| No HCQ                                                                    | 53/352 (15.1)     |          |
| Univariate analysis - odds ratio [95% confidence interval]*               |                   |          |
| Pre-FDA approval (reference: no HCQ)                                      | 1.65 [1.09-2.51]  | 0.02     |
| FDA approval (reference: no HCQ)                                          | 1.17 [0.99-1.39]  | 0.07     |
| FDA warning (reference: no HCQ)                                           | 1.50 [0.94-2.39]  | 0.09     |
| Propensity-score matched analyses-hazard ratio [95% confidence interval]* |                   |          |
| Pre-FDA approval (reference: no HCQ)                                      | 1.70 [1.17-2.48]  | 0.005    |
| FDA approval (reference: no HCQ)                                          | 1.03 [0.88-1.20]  | 0.72     |
| FDA warning (reference: no HCQ)                                           | 1.53 [1.00-2.34]  | 0.05     |

\* Comparing hydroxychloroquine group to no treatment group

1  
2  
3  
4  
5  
6  
7  
8  
9  
10  
11  
12  
13  
14  
15  
16  
17  
18  
19  
20  
21  
22  
23  
24  
25  
26  
27  
28  
29  
30  
31  
32  
33  
34  
35  
36  
37  
38  
39  
40  
41  
42  
43  
44  
45  
46  
47

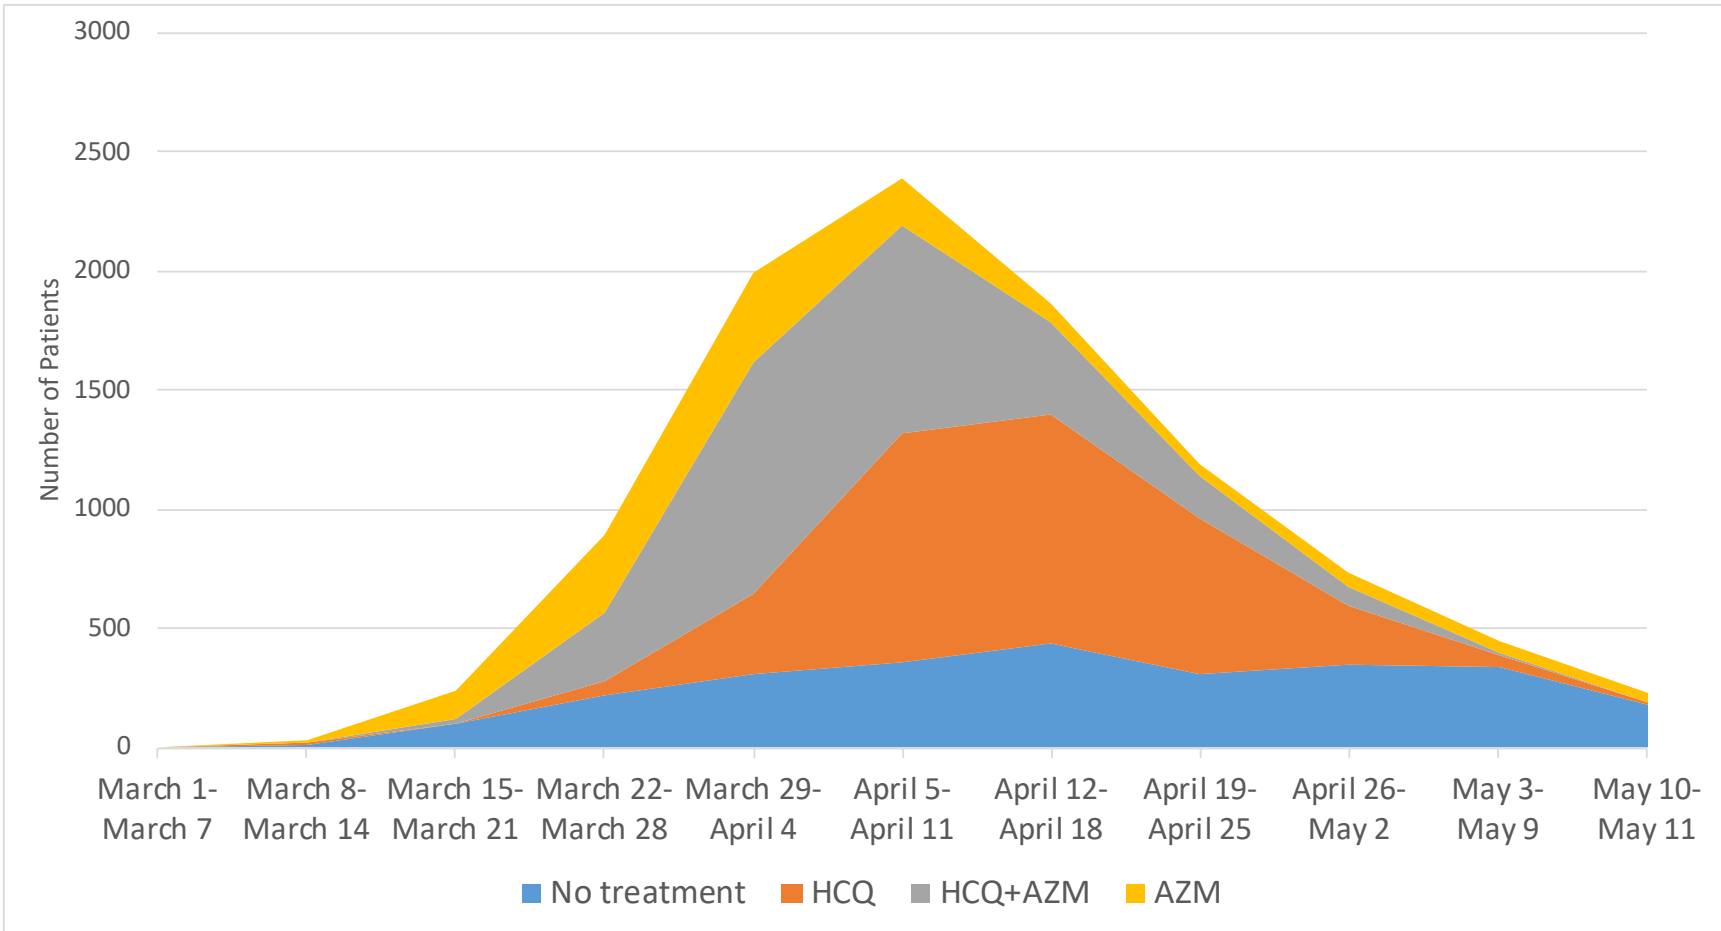

Figure 1. Trends in COVID-19 patients treated with different medications

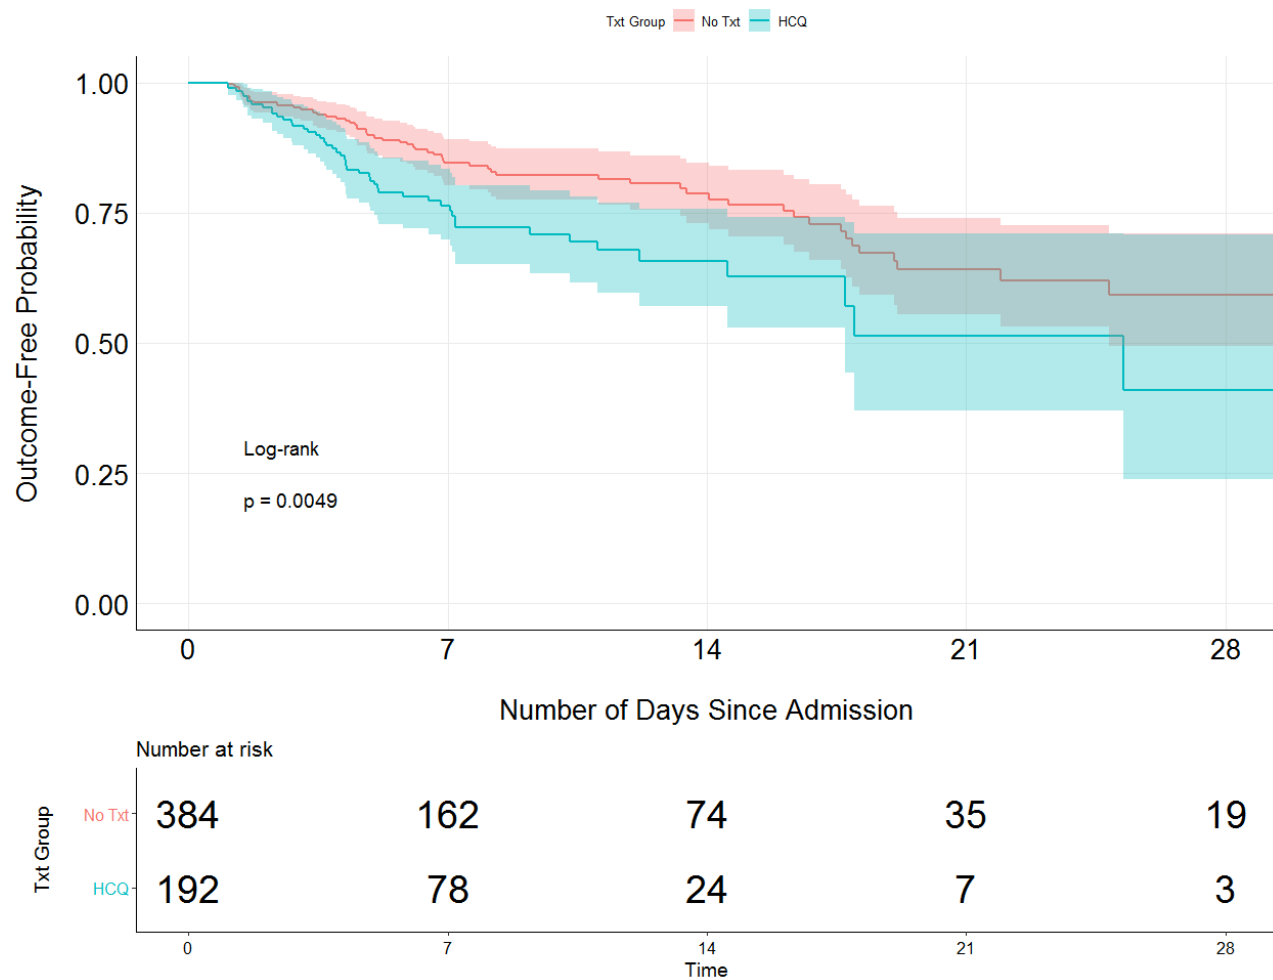

a. Pre-FDA approval

Figure 2. Kaplan-Meier curve showing freedom from composite end point of intubation or inpatient mortality by different time period

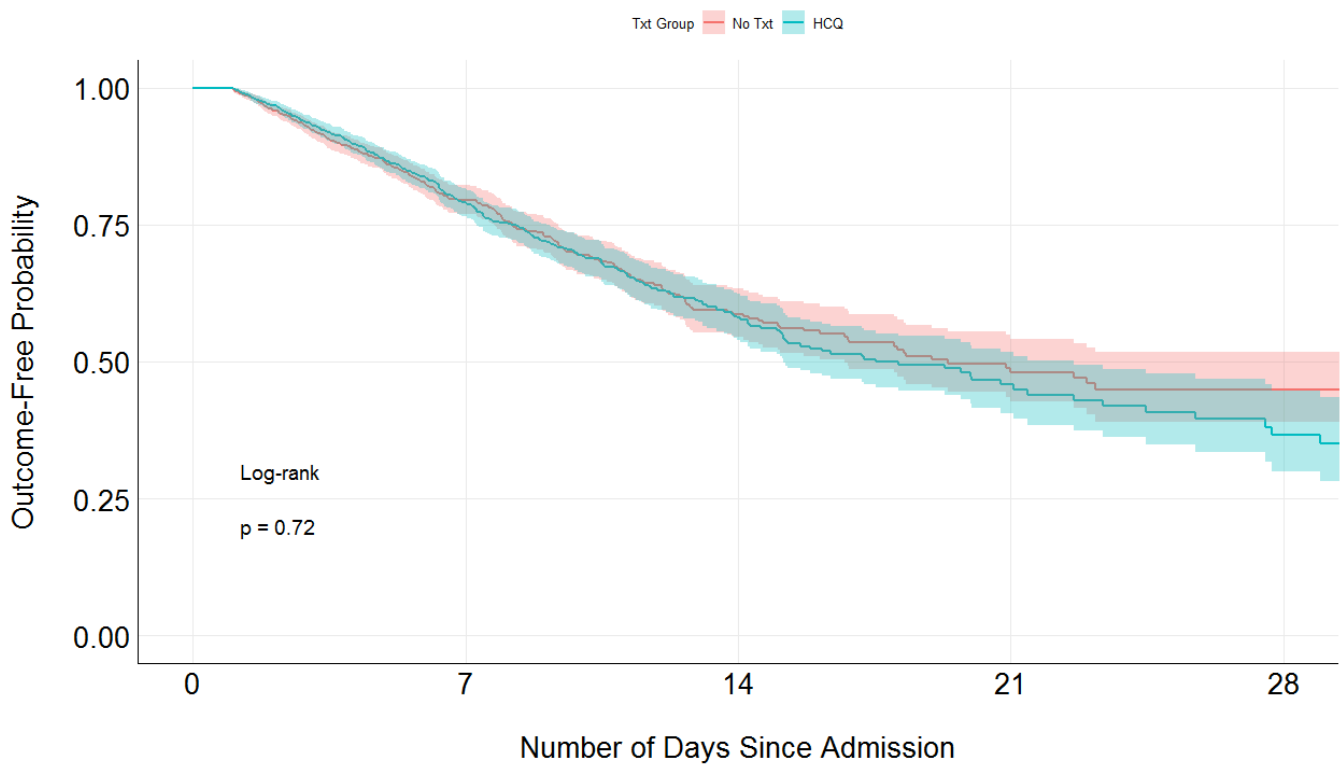

|           |        | Number at risk |     |     |    |    |
|-----------|--------|----------------|-----|-----|----|----|
|           |        | 0              | 7   | 14  | 21 | 28 |
| Txt Group | No Txt | 1406           | 498 | 148 | 60 | 27 |
|           | HCQ    | 1406           | 589 | 158 | 54 | 24 |

Time

b. FDA approval

Figure 2. Kaplan-Meier curve showing freedom from composite end point of intubation or inpatient mortality by different time period

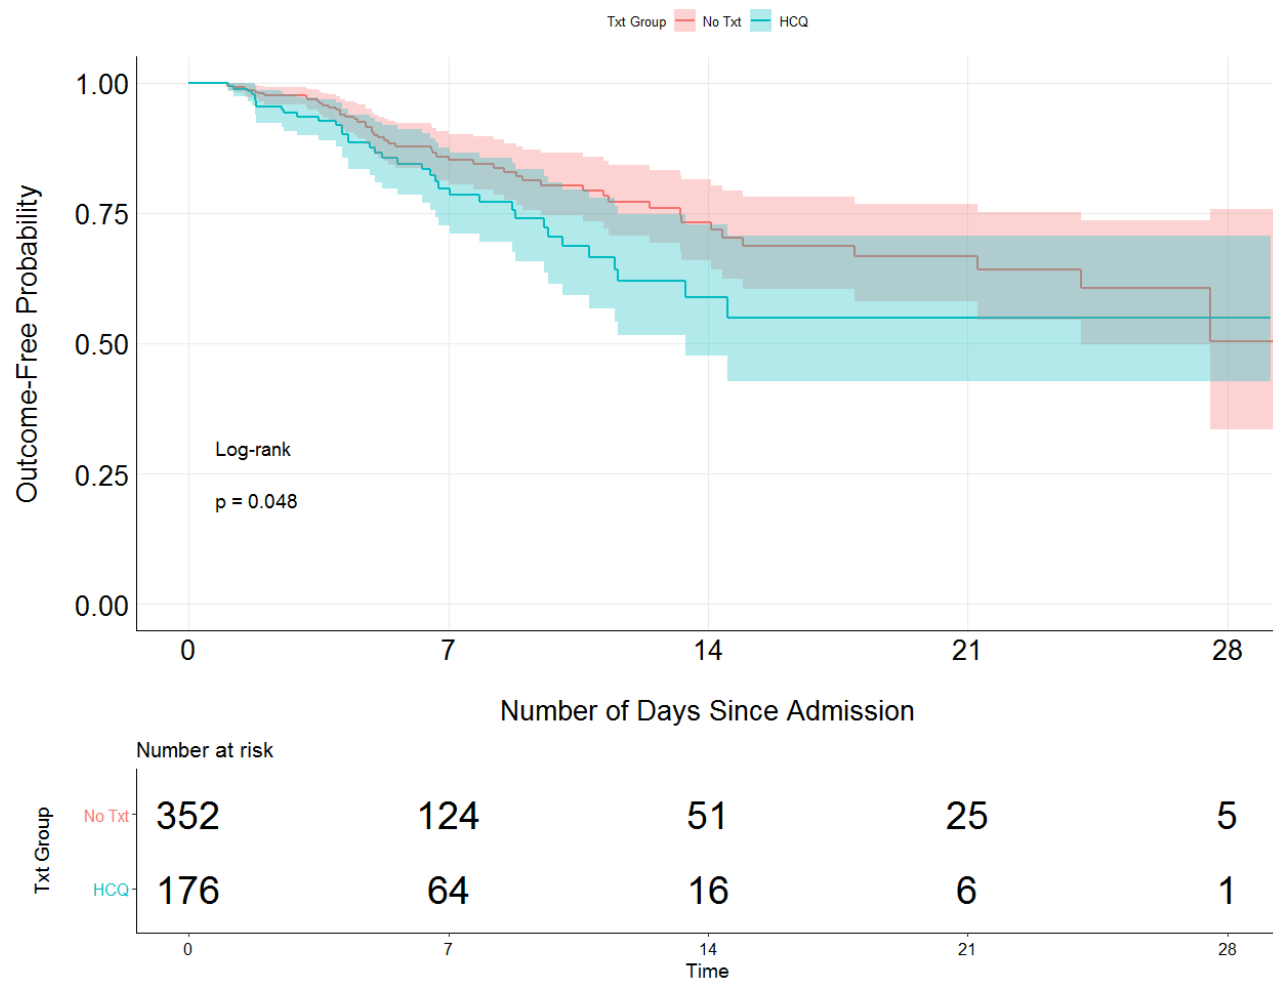

c. FDA warning

Figure 2. Kaplan-Meier curve showing freedom from composite end point of intubation or inpatient mortality by different time period

1  
2  
3  
4  
5  
6  
7  
8  
9  
10  
11  
12  
13  
14  
15  
16  
17  
18  
19  
20  
21  
22  
23  
24  
25  
26  
27  
28  
29  
30  
31  
32  
33  
34  
35  
36  
37  
38  
39  
40  
41  
42  
43  
44  
45  
46  
47  
48  
49  
50  
51  
52  
53  
54  
55  
56  
57  
58  
59  
60STROBE Statement—Checklist of items that should be included in reports of *cross-sectional studies*

|                              | <b>Item No</b> | <b>Recommendation</b>                                                                                                                                                                                                                                                                                                                                                                                                                   |
|------------------------------|----------------|-----------------------------------------------------------------------------------------------------------------------------------------------------------------------------------------------------------------------------------------------------------------------------------------------------------------------------------------------------------------------------------------------------------------------------------------|
| <b>Title and abstract</b>    | 1              | (a) Indicate the study's design with a commonly used term in the title or the abstract<br><b>Page 1</b>                                                                                                                                                                                                                                                                                                                                 |
|                              |                | (b) Provide in the abstract an informative and balanced summary of what was done and what was found<br><b>Page 2 and 3</b>                                                                                                                                                                                                                                                                                                              |
| <b>Introduction</b>          |                |                                                                                                                                                                                                                                                                                                                                                                                                                                         |
| Background/rationale         | 2              | Explain the scientific background and rationale for the investigation being reported<br><b>Page 5 and 6</b>                                                                                                                                                                                                                                                                                                                             |
| Objectives                   | 3              | State specific objectives, including any prespecified hypotheses<br><b>Page 6 lines 13-16</b>                                                                                                                                                                                                                                                                                                                                           |
| <b>Methods</b>               |                |                                                                                                                                                                                                                                                                                                                                                                                                                                         |
| Study design                 | 4              | Present key elements of study design early in the paper<br><b>Page 6 line 20</b>                                                                                                                                                                                                                                                                                                                                                        |
| Setting                      | 5              | Describe the setting, locations, and relevant dates, including periods of recruitment, exposure, follow-up, and data collection<br><b>Page 6 lines 19-Page 7 line 3, Page 7 lines 11-14, Page 8 lines 19</b>                                                                                                                                                                                                                            |
| Participants                 | 6              | (a) Give the eligibility criteria, and the sources and methods of selection of participants<br><b>Page 7 lines 10-22</b>                                                                                                                                                                                                                                                                                                                |
| Variables                    | 7              | Clearly define all outcomes, exposures, predictors, potential confounders, and effect modifiers. Give diagnostic criteria, if applicable<br><b>Page 8 lines 4-Page 9 line 16</b>                                                                                                                                                                                                                                                        |
| Data sources/<br>measurement | 8*             | For each variable of interest, give sources of data and details of methods of assessment (measurement). Describe comparability of assessment methods if there is more than one group<br><b>Page 7 lines 5- 8</b>                                                                                                                                                                                                                        |
| Bias                         | 9              | Describe any efforts to address potential sources of bias<br><b>Page 10 lines 1-6</b>                                                                                                                                                                                                                                                                                                                                                   |
| Study size                   | 10             | Explain how the study size was arrived at<br><b>Page 7 lines 10-22</b>                                                                                                                                                                                                                                                                                                                                                                  |
| Quantitative variables       | 11             | Explain how quantitative variables were handled in the analyses. If applicable, describe which groupings were chosen and why<br><b>Page 8 line 21- Page 9 line 13</b>                                                                                                                                                                                                                                                                   |
| Statistical methods          | 12             | (a) Describe all statistical methods, including those used to control for confounding<br><b>Page 9 line 18-Page 10 line 16</b><br>(b) Describe any methods used to examine subgroups and interactions<br>(c) Explain how missing data were addressed <b>Page 9 lines 12-13</b><br>(d) If applicable, describe analytical methods taking account of sampling strategy<br>(e) Describe any sensitivity analyses <b>Page 8 lines 18-19</b> |
| <b>Results</b>               |                |                                                                                                                                                                                                                                                                                                                                                                                                                                         |
| Participants                 | 13*            | (a) Report numbers of individuals at each stage of study—eg numbers potentially eligible, examined for eligibility, confirmed eligible, included in the study, completing follow-up, and analysed <b>Page 7 lines 11-15, line 22</b><br>(b) Give reasons for non-participation at each stage                                                                                                                                            |

|                          |     |                                                                                                                                                                                                                                                                |
|--------------------------|-----|----------------------------------------------------------------------------------------------------------------------------------------------------------------------------------------------------------------------------------------------------------------|
|                          |     | (c) Consider use of a flow diagram                                                                                                                                                                                                                             |
| Descriptive data         | 14* | (a) Give characteristics of study participants (eg demographic, clinical, social) and information on exposures and potential confounders<br><a href="#">Page 10 line 20-page 12 line 14</a>                                                                    |
|                          |     | (b) Indicate number of participants with missing data for each variable of interest                                                                                                                                                                            |
| Outcome data             | 15* | Report numbers of outcome events or summary measures<br><a href="#">Page 12 lines 6-11</a>                                                                                                                                                                     |
| Main results             | 16  | (a) Give unadjusted estimates and, if applicable, confounder-adjusted estimates and their precision (eg, 95% confidence interval). Make clear which confounders were adjusted for and why they were included<br><a href="#">Page 12 lines 6-Page 13 line 2</a> |
|                          |     | (b) Report category boundaries when continuous variables were categorized                                                                                                                                                                                      |
|                          |     | (c) If relevant, consider translating estimates of relative risk into absolute risk for a meaningful time period                                                                                                                                               |
| Other analyses           | 17  | Report other analyses done—eg analyses of subgroups and interactions, and sensitivity analyses                                                                                                                                                                 |
| <b>Discussion</b>        |     |                                                                                                                                                                                                                                                                |
| Key results              | 18  | Summarise key results with reference to study objectives<br><a href="#">Page 13 lines 5-12</a>                                                                                                                                                                 |
| Limitations              | 19  | Discuss limitations of the study, taking into account sources of potential bias or imprecision. Discuss both direction and magnitude of any potential bias<br><a href="#">Page 14 line 18-Page 15 line 9</a>                                                   |
| Interpretation           | 20  | Give a cautious overall interpretation of results considering objectives, limitations, multiplicity of analyses, results from similar studies, and other relevant evidence<br><a href="#">Page 14 lines 6-17</a>                                               |
| Generalisability         | 21  | Discuss the generalisability (external validity) of the study results<br><a href="#">Page 15 lines 9-10</a>                                                                                                                                                    |
| <b>Other information</b> |     |                                                                                                                                                                                                                                                                |
| Funding                  | 22  | Give the source of funding and the role of the funders for the present study and, if applicable, for the original study on which the present article is based<br><a href="#">Page 16 lines 9-12</a>                                                            |

\*Give information separately for exposed and unexposed groups.

**Note:** An Explanation and Elaboration article discusses each checklist item and gives methodological background and published examples of transparent reporting. The STROBE checklist is best used in conjunction with this article (freely available on the Web sites of PLoS Medicine at <http://www.plosmedicine.org/>, Annals of Internal Medicine at <http://www.annals.org/>, and Epidemiology at <http://www.epidem.com/>). Information on the STROBE Initiative is available at [www.strobe-statement.org](http://www.strobe-statement.org).

# BMJ Open

## Examination of patient characteristics and hydroxychloroquine use based on U.S. Food and Drug Administration's recommendation: a cross-sectional analysis in New York

|                                 |                                                                                                                                                                                                                                                                                                                                                                                                                                                                                                                                                                                                                                                                                                                                                                                                                                                                                                                                                                           |
|---------------------------------|---------------------------------------------------------------------------------------------------------------------------------------------------------------------------------------------------------------------------------------------------------------------------------------------------------------------------------------------------------------------------------------------------------------------------------------------------------------------------------------------------------------------------------------------------------------------------------------------------------------------------------------------------------------------------------------------------------------------------------------------------------------------------------------------------------------------------------------------------------------------------------------------------------------------------------------------------------------------------|
| Journal:                        | <i>BMJ Open</i>                                                                                                                                                                                                                                                                                                                                                                                                                                                                                                                                                                                                                                                                                                                                                                                                                                                                                                                                                           |
| Manuscript ID                   | bmjopen-2020-042965.R2                                                                                                                                                                                                                                                                                                                                                                                                                                                                                                                                                                                                                                                                                                                                                                                                                                                                                                                                                    |
| Article Type:                   | Original research                                                                                                                                                                                                                                                                                                                                                                                                                                                                                                                                                                                                                                                                                                                                                                                                                                                                                                                                                         |
| Date Submitted by the Author:   | 23-Dec-2020                                                                                                                                                                                                                                                                                                                                                                                                                                                                                                                                                                                                                                                                                                                                                                                                                                                                                                                                                               |
| Complete List of Authors:       | Kim, Eun Ji; Donald and Barbara Zucker School of Medicine at Hofstra/Northwell; Northwell Health Feinstein Institutes for Medical Research,<br>Coppa, Kevin; Northwell Health<br>Hirsch, Jamie; Donald and Barbara Zucker School of Medicine at Hofstra/Northwell; Northwell Health Feinstein Institutes for Medical Research,<br>Abrahams, Sara; Donald and Barbara Zucker School of Medicine at Hofstra/Northwell<br>Johnson, Jennifer; Northwell Health Feinstein Institutes for Medical Research,<br>Lesser, Martin; Northwell Health Feinstein Institutes for Medical Research, Biostatistics; Donald and Barbara Zucker School of Medicine at Hofstra/Northwell<br>Davidson, Karina W.; Feinstein Institute for Medical Research, Research; Donald and Barbara Zucker School of Medicine at Hofstra/Northwell<br>Conigliaro, Joseph; Donald and Barbara Zucker School of Medicine at Hofstra/Northwell; Northwell Health Feinstein Institutes for Medical Research, |
| <b>Primary Subject Heading</b>: | Global health                                                                                                                                                                                                                                                                                                                                                                                                                                                                                                                                                                                                                                                                                                                                                                                                                                                                                                                                                             |
| Secondary Subject Heading:      | Epidemiology, Health policy, Health services research, Infectious diseases, Medical management                                                                                                                                                                                                                                                                                                                                                                                                                                                                                                                                                                                                                                                                                                                                                                                                                                                                            |
| Keywords:                       | COVID-19, Public health < INFECTIOUS DISEASES, Epidemiology < INFECTIOUS DISEASES                                                                                                                                                                                                                                                                                                                                                                                                                                                                                                                                                                                                                                                                                                                                                                                                                                                                                         |
|                                 |                                                                                                                                                                                                                                                                                                                                                                                                                                                                                                                                                                                                                                                                                                                                                                                                                                                                                                                                                                           |

SCHOLARONE™  
Manuscripts





I, the Submitting Author has the right to grant and does grant on behalf of all authors of the Work (as defined in the below author licence), an exclusive licence and/or a non-exclusive licence for contributions from authors who are: i) UK Crown employees; ii) where BMJ has agreed a CC-BY licence shall apply, and/or iii) in accordance with the terms applicable for US Federal Government officers or employees acting as part of their official duties; on a worldwide, perpetual, irrevocable, royalty-free basis to BMJ Publishing Group Ltd ("BMJ") its licensees and where the relevant Journal is co-owned by BMJ to the co-owners of the Journal, to publish the Work in this journal and any other BMJ products and to exploit all rights, as set out in our [licence](#).

The Submitting Author accepts and understands that any supply made under these terms is made by BMJ to the Submitting Author unless you are acting as an employee on behalf of your employer or a postgraduate student of an affiliated institution which is paying any applicable article publishing charge ("APC") for Open Access articles. Where the Submitting Author wishes to make the Work available on an Open Access basis (and intends to pay the relevant APC), the terms of reuse of such Open Access shall be governed by a Creative Commons licence – details of these licences and which [Creative Commons](#) licence will apply to this Work are set out in our licence referred to above.

Other than as permitted in any relevant BMJ Author's Self Archiving Policies, I confirm this Work has not been accepted for publication elsewhere, is not being considered for publication elsewhere and does not duplicate material already published. I confirm all authors consent to publication of this Work and authorise the granting of this licence.

1  
2  
3 **Title: Examination of patient characteristics and hydroxychloroquine use based on U.S.**  
4 **Food and Drug Administration's recommendation: a cross-sectional analysis in New York**  
5

6 Eun Ji Kim, MD, MS, MS<sup>1,2</sup>  
7 Kevin Coppa, BS<sup>3</sup>  
8 Jamie S. Hirsch, MD, MA, MSB<sup>1,2,3</sup>  
9 Sara Abrahams, BS<sup>2</sup>  
10 Jennifer C. Johnson MS, MA<sup>1</sup>  
11 Martin Lesser PhD<sup>1,2</sup>  
12 Karina W. Davidson, PhD, MASc<sup>1,2</sup>  
13 Joseph Conigliaro, MD, MPH<sup>1,2</sup>  
14  
15

16  
17 The Northwell COVID-19 Research Consortium: Stuart L. Cohen, MD<sup>1,2</sup>; Charlotte  
18 Kvasnovsky, MD, PhD, MPH<sup>2</sup>; Stephen C. Machnicki, MD FCCP<sup>2</sup>; Alex Makhnevich MD<sup>1,2</sup>;  
19 Prashant Malhotra, MD<sup>1,2</sup>; Lyndonna Marrast, MD, MPH<sup>1,2</sup>; Ramanak Mitra, MD<sup>2</sup>; Ernesto P.  
20 Molmenti, MD<sup>2</sup>; Sonali Narain, MBBS, MPH<sup>1,2</sup>; M. Wasif Saif MD, MBBS<sup>1,2</sup>; Sanjaya  
21 Satapathy, MD<sup>2</sup>; Shalin Shah, MD<sup>2</sup>  
22  
23

24 <sup>1</sup> Institute of Health Innovations and Outcome Research, Feinstein Institutes for Medical  
25 Research, Northwell Health, Manhasset, New York

26 <sup>2</sup> Donald and Barbara Zucker School of Medicine at Hofstra/Northwell, Northwell Health,  
27 Hempstead, New York

28 <sup>3</sup> Department of Information Services, Northwell Health, New Hyde Park, New York  
29  
30  
31

32 Contributorship Statement

33 Concept and design: EK, KC, JH, KD, ML, JC, SC, SM, AM, PM, LM, RM, EM, SN, WS, SS

34 Acquisition: KC, JH

35 Drafting of the manuscript: EK, KC, JC, SA, JJ

36 Critical revision of the manuscript for important intellectual content: all authors

37 Statistical analysis: KC, ML, CK

38 Obtained funding: KD

39 Administrative, technical or material support: KD, JC

40 Supervision: EK, ML, KD, JH, JC  
41  
42  
43  
44  
45

46 Corresponding author: Joseph Conigliaro, MD, MPH

47 2001 Marcus Avenue S160

48 Lake Success, NY 11042

49 jconigliaro@northwell.edu  
50

51 2,761 words

52 5 tables/figure  
53  
54  
55  
56  
57  
58  
59  
60

**Abstract (300/300 words)**

**Objective:** To describe the pattern of hydroxychloroquine use and examine the association between hydroxychloroquine use and clinical outcomes arising from changes in the U.S. Food and Drug Administration (FDA)'s recommendation during the COVID-19 pandemic.

**Design:** A retrospective cross-sectional analysis.

**Setting and Participants:** We included hospitalized adult patients at Northwell Health hospitals with confirmed COVID-19 infections between March 1, 2020 and May 11, 2020. We categorized changes in the FDA recommendation as pre-FDA approval (March 1-March 27, 2020), FDA approval (March 28-April 23, 2020), and FDA warning (April 24-May 11, 2020). The hydroxychloroquine treated group received at least one dose within 48 hours of hospital admission.

**Primary outcome:** A composite of intubation and inpatient death.

**Results:** The percentages of patients who were treated with hydroxychloroquine were 192/2202 (8.7%) pre-FDA approval, 2902/6741 (43.0%) FDA approval, and 176/1066 (16.5%) FDA warning period (p-value<0.001). Using propensity score-matching, there was a higher rate of the composite outcome among patients treated with hydroxychloroquine (49/192, 25.5%) compared to no hydroxychloroquine (66/384, 17.2%) in the pre-FDA approval period (p-value=0.03) but not in the FDA-approval period (25.5% vs 22.6%, p=0.08) or the FDA warning (21.0% vs 15.1%, p=0.11) periods. Coincidentally, there was an increase in number of COVID-19 patients and disease severity during the FDA approval period (24.1% during FDA approval versus 21.4% during pre-FDA approval period). Hydroxychloroquine use was associated with increased odds of the composite outcome during the pre-FDA approval period (OR=1.65 [1.09-2.51]) but not

1  
2  
3 during the FDA approval (OR=1.17 [0.99-1.39]) and FDA warning (OR=1.50 [0.94-2.39])  
4 periods.  
5  
6

7 **Conclusions:** Hydroxychloroquine use was associated with adverse clinical outcomes only  
8 during the pre-FDA approval period but not during the FDA-approval and warning periods, even  
9 after adjusting for concurrent changes in the percentage of COVID-19 patients treated with  
10 hydroxychloroquine and the number (and disease severity) of hospitalized patients with COVID-  
11 19 infections.  
12  
13  
14  
15  
16  
17  
18  
19  
20  
21  
22  
23  
24  
25  
26  
27  
28  
29  
30  
31  
32  
33  
34  
35  
36  
37  
38  
39  
40  
41  
42  
43  
44  
45  
46  
47  
48  
49  
50  
51  
52  
53  
54  
55  
56  
57  
58  
59  
60

### Strengths and limitations

- This study examines hydroxychloroquine use with changes in the FDA recommendations during a COVID-19 pandemic.
- The study utilizes data from a large integrated health system, which include a diverse population throughout New York City, Long Island, and Westchester County.
- This study uses propensity score-matching within each FDA recommendation, to ensure that patients admitted in the FDA approval period are not matched to patients in the pre-FDA approval or FDA warning period.
- Due to the observational study design, this study does not establish causal relationship between hydroxychloroquine treatment and COVID-19 clinical outcomes.

## Introduction

Coronavirus Disease 2019 (COVID-19), which causes severe acute respiratory syndrome, has spread globally. One consequence has been the unprecedented number of intensive care unit (ICU) admissions requiring mechanical ventilation in many countries. The mortality of patients on mechanical ventilation has been reported to be 60-80% with an overall hospital mortality of 20-25% during the beginning of the pandemic.<sup>1,2</sup> More recent studies have shown lower inpatient mortality, but COVID-19 still causes significant morbidity and mortality.<sup>3,4</sup> As of November 11, 2020, over 53 million people have been infected with COVID-19 and 1.3 million deaths have been reported globally.<sup>5</sup> Although multiple vaccines are in preparation or have begun clinical testing, data on safety and efficacy required to immunize the general public is currently unavailable and may be months to years away. Therefore, the need to identify medications that are associated with slowed COVID-19 progression or decreased mortality remains urgent.

During the early months of the COVID-19 pandemic, hydroxychloroquine, a medication commonly used to prevent malaria infection and treat autoimmune diseases, gained global attention for its effectiveness in treating COVID-19 *in vitro*.<sup>6-11</sup> Hydroxychloroquine is found to reduce the entry of coronavirus into a cell through interference with the terminal glycosylation of angiotensin-converting enzyme 2 receptor, which inhibits viral replication.<sup>6,8</sup> Additionally, hydroxychloroquine has immunomodulatory activity, and may inhibit cytokine production and prevent the occurrence of cytokine storm.<sup>12</sup> Early studies examining the treatment of COVID-19 with hydroxychloroquine showed mixed results, with some studies showing no average benefit in outcomes, including intubation or inpatient mortality, but other studies showing worse outcomes.<sup>13-22</sup> A recent randomized clinical trial study examining the effects of

1  
2  
3 hydroxychloroquine has found no difference in clinical outcomes between patients treated with  
4  
5 and without hydroxychloroquine.<sup>23</sup>  
6

7  
8         However, no study has accounted for how changes in recommendations for  
9  
10 hydroxychloroquine by the United States Food and Drug Administration (FDA) affected  
11  
12 outcomes of patients treated for COVID-19. On March 28, 2020, the FDA issued an Emergency  
13  
14 Use Authorization for hydroxychloroquine in the treatment of COVID-19 infection. During this  
15  
16 time, there was also an increased number of hospitalized patients with COVID-19, which may  
17  
18 have resulted in changes in hospital capacity and disease severity.<sup>5</sup> Subsequently, on April 24,  
19  
20 2020, the FDA cautioned against using hydroxychloroquine for COVID-19 infection.<sup>24</sup> These  
21  
22 changes in the recommendation of hydroxychloroquine as a treatment for COVID-19 infection  
23  
24 may have impacted whether patients were treated with hydroxychloroquine for COVID-19.  
25  
26 These two events occurring concurrently could affect the association between  
27  
28 hydroxychloroquine and COVID-19 outcomes. Therefore, using data from one of the largest  
29  
30 healthcare systems in the United States, we described the pattern of hydroxychloroquine use over  
31  
32 time according to the FDA's position and examined the association between hydroxychloroquine  
33  
34 use and patients' clinical outcomes based on changes in FDA recommendation.  
35  
36  
37  
38  
39  
40  
41

## 42 **Methods**

### 43 *Setting*

44  
45         This is a cross-sectional analysis of data from Northwell Health, the largest academic  
46  
47 healthcare system in New York. Northwell Health serves approximately 11 million patients  
48  
49 throughout Long Island, New York City, and Westchester County and has 23 affiliated  
50  
51 healthcare facilities, including 12 acute care hospitals. The Institutional Review Board for the  
52  
53  
54  
55  
56  
57  
58  
59  
60

1  
2  
3 Feinstein Institutes for Medical Research at Northwell Health approved this case series as  
4  
5 minimal-risk research using data collected for routine clinical practice and waived the  
6  
7 requirement for informed consent.  
8  
9

### 10 11 12 *Data Source* 13

14  
15 Data for this study was obtained from the enterprise's inpatient electronic health record  
16  
17 (EHR; Sunrise Clinical Manager, Allscripts, Chicago, IL), which covers 12 of Northwell  
18  
19 Health's hospitals.  
20  
21

### 22 23 24 *Study Population* 25

26  
27 The study population included all adult patients (n=13,258), aged 18 years and older,  
28  
29 hospitalized at one of Northwell Health's 12 acute care hospitals between March 1, 2020 and  
30  
31 May 11, 2020 with a diagnosis of COVID-19 confirmed by a positive result on polymerase chain  
32  
33 reaction testing of a nasopharyngeal sample. For patients with multiple COVID-19 tests, they  
34  
35 were considered to have a confirmed COVID-19 infection if any of the repeated tests within the  
36  
37 same hospitalization returned positive. We excluded patients who died or were intubated within  
38  
39 one day of hospitalization because their clinical outcomes were likely predetermined by pre-  
40  
41 hospitalization factors. We also excluded patients who were discharged within one day of  
42  
43 admission. Patients who were admitted to the obstetrics service were excluded as all obstetrics  
44  
45 patients were screened for COVID-19 on their admission. For patients with multiple  
46  
47 hospitalizations for COVID-19, we used their first hospitalization with a confirmed diagnosis of  
48  
49 COVID-19. We excluded 3,249 patients who did not meet the inclusion and exclusion criteria.  
50  
51  
52  
53  
54  
55  
56  
57  
58  
59  
60



### *Exposure*

Patients were identified as treated with hydroxychloroquine if they received at least one dose within 48 hours of admission. The control group for this analysis consisted of patients who were not treated with hydroxychloroquine within 48 hours of admission. Patients who did not initially receive hydroxychloroquine within 48 hours but received the medication later in their hospitalization were kept in the control group. We excluded COVID-19 patients who were treated with azithromycin or a combination of hydroxychloroquine and azithromycin. We also excluded patients who were intubated prior to getting their first dose of hydroxychloroquine within 48 hours of admission.

### *Outcomes*

The primary outcome of interest was a composite outcome of time to intubation or time to inpatient death. Time until composite event was censored at time of discharge for patients who were discharged alive with no intubation during their hospitalization. The rationale for the combined primary outcome was twofold: 1) many patients who deteriorated clinically died without being intubated, often due to transition to palliative care; and 2) hospitalization stays for intubated COVID-19 patients have been very long, and many intubated COVID-19 patients at the time of the analyses may not ultimately survive. For a sensitivity analysis, we used death as the outcome. We tracked all patients who were not discharged or died until June 1, 2020.

### *Covariates*

We collected data on patients' demographic characteristics and comorbidities. Demographic characteristics included age, sex, race/ethnicity, and health insurance (commercial,

1  
2  
3 Medicaid, Medicare, other, and no insurance). We used patient-reported race and ethnicity  
4 information and categorized patients into one of five racial/ethnic groups: White, Black, Asian,  
5  
6 information and categorized patients into one of five racial/ethnic groups: White, Black, Asian,  
7  
8 Other/Multiracial, and Unknown/Declined. We also identified a subgroup of patients who  
9  
10 received immunomodulatory medications, including steroids (prednisone or  
11  
12 methylprednisolone), sarilumab, tocilizumab, anakinra, or colchicine, and included this  
13  
14 information as a covariate. We identified the presence of the following comorbidities by  
15  
16 *International Statistical Classification of Disease and Related Health Problems, Tenth Revision*  
17  
18 *(ICD-10)* coding: cancer, coronary artery disease, hypertension, asthma, chronic obstructive  
19  
20 pulmonary disease, diabetes, chronic liver disease, chronic kidney disease, and end stage renal  
21  
22 disease. We calculated the Charlson Comorbidity Index, which is an index that predicts the 10-  
23  
24 year survival of patients with multiple comorbidities, as a measure of total comorbidity burden.<sup>25</sup>  
25  
26 The only covariate with missing data was BMI, and we categorized the BMI group as not obese  
27  
28 (BMI less than 30kg/m<sup>2</sup>), obese (BMI greater than or equal to 30kg/m<sup>2</sup>), and missing BMI.  
29  
30  
31  
32

33 We categorized changes in FDA recommendation for hydroxychloroquine, into three  
34  
35 time periods: 1) pre-FDA approval (March 1-March 27, 2020); 2) FDA approval (March 28-  
36  
37 April 23, 2020); and 3) FDA warning (April 24-May 11, 2020).  
38  
39  
40  
41

### 42 *Statistical analysis*

43  
44 All analyses were performed using version 3.5.2 of the R Programming Language (R  
45  
46 Project for Statistical Computing, R Foundation, Vienna, Austria). We first performed chi-square  
47  
48 and 2-sample t-tests to compare patient characteristics treated with hydroxychloroquine to no  
49  
50 hydroxychloroquine (control).  
51  
52  
53  
54  
55  
56  
57  
58  
59  
60

1  
2  
3 We used propensity-score matching methods, 1:2 for the pre-FDA approval and the FDA  
4 warning periods and 1:1 for the FDA approval period, using the smaller group as a reference,  
5 within each period and applied the nearest-neighbor method to create a matched control sample.  
6  
7 The propensity-score matching was performed within each period so that patients admitted  
8 within the FDA approval period were not matched to patients in the pre-FDA approval or FDA  
9 warning periods, so as not to confound the effect of different FDA recommendations.  
10  
11  
12  
13  
14  
15  
16

17 We then took the following approach to conduct the analysis. We first performed logistic  
18 regressions to compare the propensity score-matched hydroxychloroquine group to the control  
19 group. For a time-to-event analysis, we used the Kaplan-Meier survival estimate and log-rank  
20 test. We examined the Kaplan-Meier survival curves for the treatment group compared to the  
21 control group, separated by the different FDA recommendation periods. If a patient was  
22 discharged alive without intubation, data was censored at the time of hospital discharge. Then,  
23 we used Cox proportional-hazard regression models to estimate the association between the  
24 propensity-matched treatment group to the control group with respect to end point free survival  
25 time. We used the Schoenfeld residuals to test the proportional hazard assumption in the Cox  
26 model.  
27  
28  
29  
30  
31  
32  
33  
34  
35  
36  
37  
38  
39  
40  
41  
42

## 43 **Results**

### 44 *Characteristics of the cohort*

45  
46 From a cohort of 10,009 patients, 3,270 (32.7%) were treated with hydroxychloroquine,  
47 2,640 (26.4%) with neither hydroxychloroquine nor azithromycin, 1,289 (12.9%) with  
48 azithromycin only, and 2,810 (28.1%) with the combination hydroxychloroquine and  
49  
50  
51  
52  
53  
54  
55  
56  
57  
58  
59  
60

1  
2  
3 azithromycin. There were differences in the number of patients treated with or without  
4  
5 hydroxychloroquine and/or azithromycin by admission period (Figure 1).  
6

7  
8 We found significant differences in the use of hydroxychloroquine and patient  
9  
10 characteristics based on changes to FDA recommendation. Number and percentages of patients  
11  
12 treated with hydroxychloroquine were 192/2202 (8.7%) pre-FDA approval, 2902/6741 (43.0%)  
13  
14 during FDA approval, and 176/1066 (16.5%) during the FDA warning period (p-value<0.001).  
15  
16 There was a significant increase in number of patients during the FDA approval period (March  
17  
18 28-April 23). During the pre-FDA approval period, there were 2,202 patients admitted with  
19  
20 COVID-19 infection, but in the following periods, the number of patients admitted with COVID-  
21  
22 19 infections was 6,741 (FDA approval period) and 1,066 (FDA warning period). Throughout  
23  
24 the study, and independent of FDA periods, there were differences in sociodemographic and  
25  
26 clinical characteristics between the treatment group compared to the control group (Table 1).  
27  
28 Higher percentage of patients who were younger (36.8% vs 32.5% were less than 60 years old),  
29  
30 male (59.9% vs 53.4%), and had commercial insurance (31.0% vs 24.2%) were treated with  
31  
32 hydroxychloroquine (p-values<0.001). Presence of comorbidity was associated with  
33  
34 hydroxychloroquine use (all p-values<0.05), except for asthma and diabetes, and chronic kidney  
35  
36 disease.  
37  
38  
39  
40  
41

42 Hydroxychloroquine groups (13.4%) had higher rates of intubation compared to the  
43  
44 control group (7.0%) (p-value<0.001). Inpatient mortality was 20.2% for hydroxychloroquine  
45  
46 versus 18.3% for no hydroxychloroquine treatment (p-value=0.01). A significantly higher  
47  
48 percentage of patients treated with hydroxychloroquine (23.4%) reached the composite outcome  
49  
50 compared to the control group (20.4%) (p-value=0.007). A higher percentage of patients on  
51  
52  
53  
54  
55  
56  
57  
58  
59  
60

1  
2  
3 hydroxychloroquine (52.8%) were treated concurrently with immunomodulatory medications  
4  
5 compared to the control group (24.7%) (p-value<0.001).  
6

7  
8 After propensity-score matching within each time period, sociodemographic  
9  
10 characteristics and comorbidity were similar between hydroxychloroquine and no  
11  
12 hydroxychloroquine group (Table 2). There were 576 patients in the pre-FDA approval period,  
13  
14 2812 patients in the FDA approval period, and 528 FDA warning period. There was a higher  
15  
16 composite outcome among patients treated with hydroxychloroquine (25.5%) compared to no  
17  
18 hydroxychloroquine (17.2%) during the pre-FDA approval period (p-value=0.03) but no  
19  
20 difference in the number of composite outcomes between hydroxychloroquine and no  
21  
22 hydroxychloroquine groups in the FDA-approval period (25.5%, vs 22.6% p=0.08) or the FDA  
23  
24 warning period (21.0 vs 15.1% %, p=0.11) (Table 3). In the univariate analysis,  
25  
26 hydroxychloroquine use was associated with increased odds of the composite outcome during the  
27  
28 pre-FDA approval period (OR=1.65 [1.09-2.51]) but there was no association during the FDA  
29  
30 approval (OR=1.17 [0.99-1.39]) as well as the FDA warning period (OR=1.50 [0.94-2.39]).  
31  
32  
33  
34  
35  
36  
37

### 38 *Time-to event analysis*

39  
40 Figure 2 shows the Kaplan-Meier curves of freedom from the composite end point of  
41  
42 intubation and inpatient mortality during the pre-FDA approval period, the FDA approval period,  
43  
44 or the FDA warning period. The cox proportional-hazard regression models showed  
45  
46 hydroxychloroquine use was associated with the composite outcome of intubation and inpatient  
47  
48 mortality during the pre-FDA approval (hazard ratio=1.70 [1.17-2.48]) and the FDA warning  
49  
50 (hazard ratio=1.53 [1.00-2.34]) period but not during the FDA approval period (hazard  
51  
52  
53  
54  
55  
56  
57  
58  
59  
60

1  
2  
3 ratio=1.03 [0.88-1.20]) (Table 3). The proportional hazards assumption was met in the cox  
4  
5 regression model.  
6  
7  
8  
9  
10

## 11 **Discussion**

12  
13  
14 In our study, while there were changes in percentage of COVID-19 patients treated with  
15 hydroxychloroquine with FDA recommendations, there was also a fluctuation of the number of  
16 hospitalized patients with COVID-19 infections during the FDA approval period.  
17  
18

19 Hydroxychloroquine treatment was associated with increased composite outcome of intubation  
20 or death during pre-FDA approval period but not during FDA approval or FDA warning period.  
21  
22

23 The overall association of hydroxychloroquine treatment among COVID-19 patients in our  
24 cohort was similar to previous studies showing no association between the treatment and primary  
25 end point of intubation or death.<sup>13,14</sup>  
26  
27

28 Although not captured in our study, hospitals during the FDA approval period had to  
29 manage sudden increases in critically ill patients. As hospitals were reaching their maximum  
30 capacity, coordinated efforts were made to ensure that there were adequate ventilators for  
31 patients with pulmonary complications, goals of care discussions for patients with poor  
32 prognosis, and an increase in ambulatory management to ensure medical care for all patients.<sup>26-28</sup>  
33  
34

35 Therefore, patients who were admitted during this period may have had more severe disease,  
36 including hypoxia, requiring ventilators. This hypothesis is also consistent with the higher  
37 proportions of patients experiencing the composite outcome during this period. There was also  
38 an increased use of immunomodulators, which were more often used for patients with more  
39 complications, including acute respiratory distress syndrome, acute kidney injury, thrombosis,  
40  
41  
42  
43  
44  
45  
46  
47  
48  
49  
50  
51  
52  
53  
54  
55  
56  
57  
58  
59  
60

1  
2  
3 etc.<sup>1,29,30</sup> Therefore, regardless of whether they were being treated with hydroxychloroquine or  
4  
5 not, patients admitted during the FDA approval period had overall worse outcomes compared to  
6  
7 patients admitted during other periods. Because of such differences in patient disease severity  
8  
9 and hospital settings, we used propensity-score matching of patients within each period so that  
10  
11 the patients treated in the pre-FDA approval or FDA warning periods were not matched with  
12  
13 patients treated in the FDA approval period.  
14  
15

16  
17 The lack of efficacy of hydroxychloroquine could be attributed to the severity of disease  
18  
19 among patients receiving medication. The hypothesized mechanism of action of  
20  
21 hydroxychloroquine is that it prevents the virus from entering cells and blocks viral replication.<sup>6-</sup>  
22  
23 <sup>8</sup> These patients were hospitalized because of a severe course of disease, and therefore it is likely  
24  
25 that viral replication was already high when hydroxychloroquine was administered. This may be  
26  
27 particularly true for patients who were hospitalized during the FDA approved period because  
28  
29 hospitals had a high number of COVID-19 patients requiring inpatient care. Also,  
30  
31 hydroxychloroquine may have been administered to more severely ill patients and subsequently  
32  
33 was associated with higher risk of intubation and/or inpatient mortality. We addressed this by  
34  
35 propensity-score matching patients treated with hydroxychloroquine to no hydroxychloroquine.  
36  
37 Of note, higher doses of hydroxychloroquine have been associated with adverse intermediate  
38  
39 outcomes, including QTc prolongation, in another study.<sup>31</sup>  
40  
41  
42  
43

44  
45 This study has several limitations. Due to the observational study design, this study does  
46  
47 not establish causal relationships between medication treatment and outcomes. Also, this study is  
48  
49 limited to the inpatient setting, therefore the study findings are not generalizable to outpatient or  
50  
51 community settings. Though we did attempt to adjust for covariates, it is possible that the  
52  
53 severity of illness and precise timing of treatment also may have influenced the association of  
54  
55  
56  
57  
58  
59  
60

1  
2  
3 these medications with the outcome. There might be a subset of patients who were taking  
4 hydroxychloroquine prescribed by their ambulatory providers prior to their hospitalization. It is  
5 possible that some patients in the no hydroxychloroquine group were taking the medications or  
6 already had completed their 5-day course prior to hospitalization. There was a subset of patients  
7 in the control group who were treated with hydroxychloroquine or azithromycin after 48 hours  
8 because of their disease progression. The changes in the FDA recommendations probably also  
9 caused some patients admitted during the pre-FDA approval period to be treated with  
10 hydroxychloroquine during their prolonged hospitalizations. This could result in bias toward the  
11 null, that is, erroneously concluding no difference between hydroxychloroquine and control  
12 (Type II error). The strength of this study, however, is the inclusion of a large, diverse  
13 population, including racial and ethnic minorities, extending the generalizability of our study.  
14  
15  
16  
17  
18  
19  
20  
21  
22  
23  
24  
25  
26  
27

28       Regardless of FDA's recommendation for the drug, we did not observe any beneficial  
29 association of hydroxychloroquine use throughout the study period. In addition to changes in the  
30 FDA recommendation, this study addresses changes in case mix due to changes in number of  
31 COVID-19 patients being hospitalized. This study further confirms that hydroxychloroquine  
32 does not alter the clinical course among patients with COVID-19 infections in the inpatient  
33 setting where patients have more severe diseases. Additionally, recent evidence suggests that  
34 hydroxychloroquine treatment does not alter clinical outcomes among patients with milder  
35 symptoms and is not effective as pharmacologic prophylaxis.<sup>32,33</sup> On June 15, 2020, the FDA  
36 revoked the Emergency Use Authorization for hydroxychloroquine in the treatment of COVID-  
37 19 infection and this will further decrease the number of COVID-19 patients being treated with  
38 hydroxychloroquine.<sup>34</sup> These study results should not be used as guidance on whether or not to  
39 treat COVID-19 patients with or without hydroxychloroquine due to its observational design.  
40  
41  
42  
43  
44  
45  
46  
47  
48  
49  
50  
51  
52  
53  
54  
55  
56  
57  
58  
59  
60



### **Data Availability Statement**

The data that support the findings of this study are available on request from [COVID19@northwell.edu](mailto:COVID19@northwell.edu). The data are not publicly available due to restrictions as it could compromise the privacy of research participants.

### **Conflict of Interest Disclosures**

The authors report no real or apparent conflicts of interest.

### **Funding/Support**

This work was supported by grants R24AG064191 from the National Institute on Aging of the National Institutes of Health and R01LM012836 from the National Library of Medicine of the National Institutes of Health.

### **Role of the Funder/Sponsor**

The funders had no role in the design and conduct of the study; collection, management, analysis, and interpretation of the data; preparation, review, or approval of the manuscript; and decision to submit the manuscript for publication. The views expressed in this paper are those of the authors and do not represent the views of the National Institutes of Health, the United States Department of Health and Human Services, or any other government entity.

### **Patient and Public Involvement**

1  
2  
3 Patients or the public were not involved in the design, or conduct, or reporting, or dissemination  
4 plans of our research.  
5  
6  
7  
8  
9

## 10 **Figures**

11  
12 Figure 1. Number of COVID-19 patients treated with different medications  
13

14 Figure 2. Kaplan-Meier curve showing freedom from composite end point of intubation or  
15 inpatient mortality by different time period  
16  
17  
18  
19  
20  
21  
22  
23  
24  
25  
26  
27  
28  
29  
30  
31  
32  
33  
34  
35  
36  
37  
38  
39  
40  
41  
42  
43  
44  
45  
46  
47  
48  
49  
50  
51  
52  
53  
54  
55  
56  
57  
58  
59  
60

## References

1. Wu C, Chen X, Cai Y, et al. Risk Factors Associated With Acute Respiratory Distress Syndrome and Death in Patients With Coronavirus Disease 2019 Pneumonia in Wuhan, China. *JAMA Intern Med.* 2020.
2. Richardson S, Hirsch JS, Narasimhan M, et al. Presenting Characteristics, Comorbidities, and Outcomes Among 5700 Patients Hospitalized With COVID-19 in the New York City Area. *JAMA.* 2020.
3. Angeli F, Bachetti T, Maugeri Study G. Temporal changes in co-morbidities and mortality in patients hospitalized for COVID-19 in Italy. *Eur J Intern Med.* 2020.
4. Horwitz LI, Jones SA, Cerfolio RJ, et al. Trends in COVID-19 Risk-Adjusted Mortality Rates. *J Hosp Med.* 2020.
5. The Center for Systems Science and Engineering at Johns Hopkins University. COVID-19 dashboard. <https://www.arcgis.com/apps/opsdashboard/index.html#/bda7594740fd40299423467b48e9ecf6>. Published 2020. Accessed June 10, 2020.
6. Yao X, Ye F, Zhang M, et al. In Vitro Antiviral Activity and Projection of Optimized Dosing Design of Hydroxychloroquine for the Treatment of Severe Acute Respiratory Syndrome Coronavirus 2 (SARS-CoV-2). *Clin Infect Dis.* 2020.
7. Wang M, Cao R, Zhang L, et al. Remdesivir and chloroquine effectively inhibit the recently emerged novel coronavirus (2019-nCoV) in vitro. *Cell Res.* 2020;30(3):269-271.
8. Vincent MJ, Bergeron E, Benjannet S, et al. Chloroquine is a potent inhibitor of SARS coronavirus infection and spread. *Virol J.* 2005;2:69.
9. Liu J, Cao R, Xu M, et al. Hydroxychloroquine, a less toxic derivative of chloroquine, is effective in inhibiting SARS-CoV-2 infection in vitro. *Cell Discov.* 2020;6:16.
10. Andreani J, Le Bideau M, Dufloy I, et al. In vitro testing of combined hydroxychloroquine and azithromycin on SARS-CoV-2 shows synergistic effect. *Microb Pathog.* 2020;145:104228.
11. Grassin-Delyle S, Salvator H, Brollo M, et al. Chloroquine inhibits the release of inflammatory cytokines by human lung explants. *Clin Infect Dis.* 2020.
12. Schrezenmeier E, Dorner T. Mechanisms of action of hydroxychloroquine and chloroquine: implications for rheumatology. *Nat Rev Rheumatol.* 2020;16(3):155-166.
13. Geleris J, Sun Y, Platt J, et al. Observational Study of Hydroxychloroquine in Hospitalized Patients with Covid-19. *N Engl J Med.* 2020.
14. Rosenberg ES, Dufort EM, Udo T, et al. Association of Treatment With Hydroxychloroquine or Azithromycin With In-Hospital Mortality in Patients With COVID-19 in New York State. *JAMA.* 2020.
15. Tang W, Cao Z, Han M, et al. Hydroxychloroquine in patients with mainly mild to moderate coronavirus disease 2019: open label, randomised controlled trial. *BMJ.* 2020;369:m1849.
16. Molina JM, Delaugerre C, Le Goff J, et al. No evidence of rapid antiviral clearance or clinical benefit with the combination of hydroxychloroquine and azithromycin in patients with severe COVID-19 infection. *Med Mal Infect.* 2020;50(4):384.
17. Magagnoli J, Narendran S, Pereira F, et al. Outcomes of hydroxychloroquine usage in United States veterans hospitalized with Covid-19. *medRxiv.* 2020.
18. Fiolet T, Guihur A, Rebeaud ME, Mulot M, Peiffer-Smadja N, Mahamat-Saleh Y. Effect of hydroxychloroquine with or without azithromycin on the mortality of coronavirus

- disease 2019 (COVID-19) patients: a systematic review and meta-analysis. *Clin Microbiol Infect.* 2020.
19. Gautret P, Lagier JC, Parola P, et al. Hydroxychloroquine and azithromycin as a treatment of COVID-19: results of an open-label non-randomized clinical trial. *Int J Antimicrob Agents.* 2020:105949.
  20. Gao J, Tian Z, Yang X. Breakthrough: Chloroquine phosphate has shown apparent efficacy in treatment of COVID-19 associated pneumonia in clinical studies. *Biosci Trends.* 2020;14(1):72-73.
  21. Chen Z, Hu J, Zhang Z, et al. Efficacy of hydroxychloroquine in patients with COVID-19: results of a randomized clinical trial. *medRxiv.* 2020.
  22. Arshad S, Kilgore P, Chaudhry ZS, et al. Treatment with hydroxychloroquine, azithromycin, and combination in patients hospitalized with COVID-19. *Int J Infect Dis.* 2020;97:396-403.
  23. Self WH, Semler MW, Leither LM, et al. Effect of Hydroxychloroquine on Clinical Status at 14 Days in Hospitalized Patients With COVID-19: A Randomized Clinical Trial. *JAMA.* 2020.
  24. Hydroxychloroquine or Chloroquine for COVID-19: Drug Safety Communication - FDA Cautions Against Use Outside of the Hospital Setting or a Clinical Trial Due to Risk of Heart Rhythm Problems. U.S. Food & Drug Administration <https://www.fda.gov/safety/medical-product-safety-information/hydroxychloroquine-or-chloroquine-covid-19-drug-safety-communication-fda-cautions-against-use>. Accessed May 15, 2020.
  25. Charlson ME, Pompei P, Ales KL, MacKenzie CR. A new method of classifying prognostic comorbidity in longitudinal studies: development and validation. *J Chronic Dis.* 1987;40(5):373-383.
  26. Curtis JR, Kross EK, Stapleton RD. The Importance of Addressing Advance Care Planning and Decisions About Do-Not-Resuscitate Orders During Novel Coronavirus 2019 (COVID-19). *JAMA.* 2020.
  27. Greenhalgh T, Koh GCH, Car J. Covid-19: a remote assessment in primary care. *BMJ.* 2020;368:m1182.
  28. White DB, Lo B. A Framework for Rationing Ventilators and Critical Care Beds During the COVID-19 Pandemic. *JAMA.* 2020.
  29. Hirsch JS, Ng JH, Ross DW, et al. Acute Kidney Injury in Patients Hospitalized with Covid-19. *Kidney Int.* 2020.
  30. Connors JM, Levy JH. COVID-19 and its implications for thrombosis and anticoagulation. *Blood.* 2020;135(23):2033-2040.
  31. Borba MGS, Val FFA, Sampaio VS, et al. Effect of High vs Low Doses of Chloroquine Diphosphate as Adjunctive Therapy for Patients Hospitalized With Severe Acute Respiratory Syndrome Coronavirus 2 (SARS-CoV-2) Infection: A Randomized Clinical Trial. *JAMA Netw Open.* 2020;3(4):e208857.
  32. Abella BS, Jolkovsky EL, Biney BT, et al. Efficacy and Safety of Hydroxychloroquine vs Placebo for Pre-exposure SARS-CoV-2 Prophylaxis Among Health Care Workers: A Randomized Clinical Trial. *JAMA Intern Med.* 2020.
  33. Boulware DR, Pullen MF, Bangdiwala AS, et al. A Randomized Trial of Hydroxychloroquine as Postexposure Prophylaxis for Covid-19. *N Engl J Med.* 2020;383(6):517-525.

- 1  
2  
3 34. Coronavirus (COVID-19) Update: FDA Revokes Emergency Use Authorization for  
4 Chloroquine and Hydroxychloroquine. U.S. Foods and Drug Administration.  
5 [https://www.fda.gov/news-events/press-announcements/coronavirus-covid-19-update-](https://www.fda.gov/news-events/press-announcements/coronavirus-covid-19-update-fda-revokes-emergency-use-authorization-chloroquine-and)  
6 [fda-revokes-emergency-use-authorization-chloroquine-and](https://www.fda.gov/news-events/press-announcements/coronavirus-covid-19-update-fda-revokes-emergency-use-authorization-chloroquine-and). Published June 15, 2020.  
7 Accessed June 20, 2020.  
8  
9  
10  
11  
12  
13  
14  
15  
16  
17  
18  
19  
20  
21  
22  
23  
24  
25  
26  
27  
28  
29  
30  
31  
32  
33  
34  
35  
36  
37  
38  
39  
40  
41  
42  
43  
44  
45  
46  
47  
48  
49  
50  
51  
52  
53  
54  
55  
56  
57  
58  
59  
60

Table 1. Patient characteristics before propensity-score matching, number (percentage) for categorical variable and mean (standard deviation) for continuous variable

|                                         | All<br>(n=10,009) | HCQ<br>(n=3,270) | No HCQ<br>(n=2,640) | P-value* |
|-----------------------------------------|-------------------|------------------|---------------------|----------|
| <b>Sociodemographic characteristics</b> |                   |                  |                     |          |
| Age at admission, mean (SD)             | 64.99 (16.35)     | 64.29 (15.58)    | 66.87 (17.73)       | <0.001   |
| Age group                               |                   |                  |                     | <0.001   |
| 18-49                                   | 1747 (17.5)       | 558 (17.1)       | 434 (16.4)          |          |
| 50-59                                   | 1863 (18.6)       | 645 (19.7)       | 425 (16.1)          |          |
| 60-69                                   | 2277 (22.7)       | 816 (25.0)       | 530 (20.1)          |          |
| 70-79                                   | 2046 (20.4)       | 671 (20.5)       | 518 (19.6)          |          |
| 80+                                     | 2076 (20.7)       | 580 (17.7)       | 733 (27.8)          |          |
| Male                                    | 5847 (58.4)       | 1959 (59.9)      | 1411 (53.4)         | <0.001   |
| Race                                    |                   |                  |                     | <0.001   |
| White                                   | 3923 (39.2)       | 1151 (35.2)      | 1182 (44.8)         |          |
| Black                                   | 2104 (21.0)       | 632 (19.3)       | 581 (22.0)          |          |
| Asian                                   | 849 (8.5)         | 327 (10.0)       | 236 (8.9)           |          |
| Other/Multiracial                       | 2648 (26.5)       | 958 (29.3)       | 540 (20.5)          |          |
| Unknown                                 | 485 (4.8)         | 202 (6.2)        | 101 (3.8)           |          |
| Health insurance                        |                   |                  |                     | <0.001   |
| Commercial                              | 2947 (29.4)       | 1013 (31.0)      | 638 (24.2)          |          |
| Medicaid                                | 2041 (20.4)       | 712 (21.8)       | 488 (18.5)          |          |
| Medicare                                | 4754 (47.5)       | 1431 (43.8)      | 1453 (55.0)         |          |
| Other                                   | 133 (1.3)         | 46 (1.4)         | 45 (1.7)            |          |
| No insurance                            | 134 (1.3)         | 68 (2.1)         | 16 (0.6)            |          |
| <b>Comorbidity</b>                      |                   |                  |                     |          |
| Cancer                                  | 832 (8.3)         | 238 (7.3)        | 278 (10.5)          | <0.001   |
| Coronary artery disease                 | 1339 (13.4)       | 399 (12.2)       | 429 (16.2)          | <0.001   |
| Hypertension                            | 6073 (60.7)       | 1973 (60.3)      | 1673 (63.4)         | 0.02     |
| Peripheral artery/vascular disease      | 282 (2.8)         | 81 (2.5)         | 100 (3.8)           | 0.005    |
| Asthma                                  | 842 (8.4)         | 271 (8.3)        | 198 (7.5)           | 0.29     |
| Chronic obstructive pulmonary disease   | 639 (6.4)         | 168 (5.1)        | 174 (6.6)           | 0.02     |
| Diabetes                                | 3624 (36.2)       | 1233 (37.7)      | 945 (35.8)          | 0.14     |
| Chronic liver disease                   | 298 (3.0)         | 74 (2.3)         | 110 (4.2)           | <0.001   |
| Chronic kidney disease                  | 507 (5.1)         | 155 (4.7)        | 152 (5.8)           | 0.09     |
| End stage renal disease                 | 461 (4.6)         | 144 (4.4)        | 168 (6.4)           | 0.001    |
| Charlson Comorbidity Index, mean SD     | 4.89 (3.58)       | 4.56 (3.38)      | 5.74 (3.77)         | <0.001   |
| Obesity                                 |                   |                  |                     | <0.001   |
| Obese                                   | 2810 (28.1)       | 1001 (30.6)      | 570 (21.6)          |          |
| Not obese                               | 4632 (46.3)       | 1483 (45.4)      | 1296 (49.1)         |          |
| Missing BMI                             | 2567 (25.6)       | 786 (24.0)       | 774 (29.3)          |          |
| BMI, mean (SD)                          | 29.23 (7.06)      | 29.66 (7.04)     | 28.13 (7.14)        | <0.001   |

1  
2  
3  
4  
5  
6  
7  
8  
9  
10  
11  
12  
13  
14  
15  
16  
17  
18  
19  
20  
21  
22  
23  
24  
25  
26  
27  
28  
29  
30  
31  
32  
33  
34  
35  
36  
37  
38  
39  
40  
41  
42  
43  
44  
45  
46  
47  
48  
49  
50  
51  
52  
53  
54  
55  
56  
57  
58  
59  
60

**Clinical outcomes**

|                           |             |             |             |        |
|---------------------------|-------------|-------------|-------------|--------|
| Admission week            |             |             |             | <0.001 |
| Pre-FDA approval          | 2202 (22.0) | 192 (5.9)   | 496 (18.8)  |        |
| FDA approval              | 6741 (67.3) | 2902 (88.7) | 1406 (53.3) |        |
| FDA warning               | 1066 (10.7) | 176 (5.4)   | 738 (28.0)  |        |
| Length of stay, mean (SD) | 9.51 (9.60) | 9.56 (9.14) | 8.80 (9.27) | 0.001  |
| Immunomodulator use       | 4183 (41.8) | 1727 (52.8) | 651 (24.7)  | <0.001 |
| ICU stay                  | 1985 (19.8) | 583 (17.8)  | 426 (16.1)  | 0.09   |
| Mechanical ventilation    | 1314 (13.1) | 437 (13.4)  | 186 (7.0)   | <0.001 |
| Inpatient mortality       | 1983 (19.8) | 660 (20.2)  | 482 (18.3)  | 0.01   |
| Composite Outcome         | 2413 (24.1) | 764 (23.4)  | 538 (20.4)  | 0.007  |

\* Comparing hydroxychloroquine group to no treatment group

Table 2. Patient characteristics after propensity-score matching, number (percentage) for categorical variable and mean (standard deviation) for continuous variable

|                                         | Pre-FDA approval |                |        | FDA approval |                 |       | FDA warning |                |       |
|-----------------------------------------|------------------|----------------|--------|--------------|-----------------|-------|-------------|----------------|-------|
|                                         | HCQ (n=192)      | No HCQ (n=384) | SMD    | HCQ (n=1406) | No HCQ (n=1406) | SMD   | HCQ (n=176) | No HCQ (n=352) | SMD   |
| <b>Sociodemographic characteristics</b> |                  |                |        |              |                 |       |             |                |       |
| Age at admission, mean (SD)             | 61.1 (15.8)      | 62.8 (17.2)    | 0.101  | 67.8 (15.8)  | 67.3 (17.6)     | 0.03  | 66.2 (16.2) | 66.3 (17.6)    | 0.007 |
| Male                                    | 109 (56.8)       | 218 (56.8)     | <0.001 | 740 (52.6)   | 765 (54.4)      | 0.036 | 92 (52.3)   | 194 (55.1)     | 0.057 |
| Race                                    |                  |                | 0.134  |              |                 | 0.013 |             |                | 0.05  |
| White                                   | 91 (47.4)        | 180 (46.9)     |        | 610 (43.4)   | 612 (43.5)      |       | 65 (36.9)   | 136 (38.6)     |       |
| Black                                   | 35 (18.2)        | 86 (22.4)      |        | 306 (21.8)   | 302 (21.5)      |       | 37 (21.0)   | 69 (19.6)      |       |
| Asian                                   | 17 (8.9)         | 37 (9.6)       |        | 143 (10.2)   | 143 (10.2)      |       | 12 (6.8)    | 25 (7.1)       |       |
| Other/Multiracial                       | 44 (22.9)        | 72 (18.8)      |        | 297 (21.1)   | 296 (21.1)      |       | 53 (30.1)   | 106 (30.1)     |       |
| Unknown                                 | 5 (2.6)          | 9 (2.3)        |        | 50 (3.6)     | 53 (3.8)        |       | 9 (5.1)     | 16 (4.5)       |       |
| Health insurance                        |                  |                | 0.257  |              |                 | 0.039 |             |                | 0.036 |
| Commercial                              | 91 (47.4)        | 134 (34.9)     |        | 306 (21.8)   | 321 (22.8)      |       | 44 (25.0)   | 92 (26.1)      |       |
| Medicaid                                | 30 (15.6)        | 72 (18.8)      |        | 246 (17.5)   | 249 (17.7)      |       | 31 (17.6)   | 62 (17.6)      |       |
| Medicare                                | 71 (37.0)        | 178 (46.4)     |        | 819 (58.3)   | 805 (57.3)      |       | 92 (52.3)   | 182 (51.7)     |       |
| Other                                   | 0 (0.0)          | 0 (0.0)        |        | 27 (1.9)     | 22 (1.6)        |       | 6 (3.4)     | 11 (3.1)       |       |
| No insurance                            | 0 (0.0)          | 0 (0.0)        |        | 8 (0.6)      | 9 (0.6)         |       | 3 (1.7)     | 5 (1.4)        |       |
| <b>Comorbidity</b>                      |                  |                |        |              |                 |       |             |                |       |
| Cancer                                  | 10 (5.2)         | 25 (6.5)       | 0.055  | 134 (9.5)    | 151 (10.7)      | 0.04  | 16 (9.1)    | 30 (8.5)       | 0.02  |
| Coronary artery disease                 | 23 (12.0)        | 56 (14.6)      | 0.077  | 218 (15.5)   | 222 (15.8)      | 0.008 | 27 (15.3)   | 53 (15.1)      | 0.008 |
| Hypertension                            | 109 (56.8)       | 237 (61.7)     | 0.101  | 915 (65.1)   | 884 (62.9)      | 0.046 | 107 (60.8)  | 205 (58.2)     | 0.052 |
| Peripheral artery/vascular disease      | 7 (3.6)          | 13 (3.4)       | 0.014  | 48 (3.4)     | 42 (3.0)        | 0.024 | 6 (3.4)     | 6 (1.7)        | 0.108 |
| Asthma                                  | 24 (12.5)        | 35 (9.1)       | 0.109  | 88 (6.3)     | 100 (7.1)       | 0.034 | 17 (9.7)    | 32 (9.1)       | 0.019 |
| Chronic obstructive pulmonary disease   | 9 (4.7)          | 23 (6.0)       | 0.058  | 83 (5.9)     | 87 (6.2)        | 0.012 | 14 (8.0)    | 29 (8.2)       | 0.01  |
| Diabetes                                | 70 (36.5)        | 138 (35.9)     | 0.011  | 515 (36.6)   | 508 (36.1)      | 0.01  | 68 (38.6)   | 131 (37.2)     | 0.029 |
| Chronic liver disease                   | 7 (3.6)          | 15 (3.9)       | 0.014  | 47 (3.3)     | 56 (4.0)        | 0.034 | 7 (4.0)     | 19 (5.4)       | 0.067 |
| Chronic kidney disease                  | 11 (5.7)         | 25 (6.5)       | 0.033  | 84 (6.0)     | 80 (5.7)        | 0.012 | 8 (4.5)     | 17 (4.8)       | 0.013 |



|    |                                  |               |               |       |             |             |       |             |             |        |
|----|----------------------------------|---------------|---------------|-------|-------------|-------------|-------|-------------|-------------|--------|
| 1  |                                  |               |               |       |             |             |       |             |             |        |
| 2  |                                  |               |               |       |             |             |       |             |             |        |
| 3  | End stage renal disease          | 12 (6.2)      | 27 (7.0)      | 0.031 | 99 (7.0)    | 101 (7.2)   | 0.006 | 4 (2.3)     | 8 (2.3)     | <0.001 |
| 4  | Charlson Comorbidity Index, mean |               |               |       |             |             |       |             |             |        |
| 5  | SD                               | 4.23 (3.19)   | 4.73 (3.32)   | 0.152 | 5.72 (3.75) | 5.69 (3.73) | 0.008 | 5.03 (3.23) | 5.01 (3.42) | 0.005  |
| 6  | Obesity                          |               |               | 0.198 |             |             | 0.022 |             |             | 0.027  |
| 7  |                                  |               |               |       |             |             |       |             |             |        |
| 8  | Obese                            | 76 (39.6)     | 116 (30.2)    |       | 289 (20.6)  | 292 (20.8)  |       | 50 (28.4)   | 98 (27.8)   |        |
| 9  | Not obese                        | 69 (35.9)     | 160 (41.7)    |       | 678 (48.2)  | 663 (47.2)  |       | 84 (47.7)   | 166 (47.2)  |        |
| 10 | Missing BMI                      | 47 (24.5)     | 108 (28.1)    |       | 439 (31.2)  | 451 (32.1)  |       | 42 (23.9)   | 88 (25.0)   |        |
| 11 | <b>Clinical outcomes</b>         |               |               |       |             |             |       |             |             |        |
| 12 |                                  |               |               |       |             |             |       |             |             |        |
| 13 | Length of stay, mean (SD)        | 10.88 (11.20) | 10.48 (11.79) | 0.035 | 9.29 (8.66) | 7.75 (7.82) | 0.187 | 8.67 (7.55) | 8.28 (7.40) | 0.053  |
| 14 | Mechanical ventilation           | 33 (17.2)     | 29 (7.6)      | 0.296 | 168 (11.9)  | 85 (6.0)    | 0.207 | 26 (14.8)   | 25 (7.1)    | 0.248  |
| 15 | Inpatient mortality              | 31 (16.1)     | 55 (14.3)     | 0.272 | 318 (22.6)  | 294 (20.9)  | 0.086 | 32 (18.2)   | 46 (13.1)   | 0.079  |
| 16 | Composite Outcome                | 49 (25.5)     | 66 (17.2)     | 0.204 | 359 (25.5)  | 318 (22.6)  | 0.068 | 37 (21.0)   | 53 (15.1)   | 0.156  |

\* Comparing hydroxychloroquine group to no treatment group

SMD=Standardized mean difference

Table 3. Association between hydroxychloroquine use and the composite end point in the crude analysis and propensity-score matched analysis

| Analysis                                                                  | Results           | P-value* |
|---------------------------------------------------------------------------|-------------------|----------|
| Composite outcome among patients at risk, n (%)                           |                   |          |
| Before propensity score matching                                          |                   |          |
| All periods                                                               |                   |          |
| Overall                                                                   | 2080/10009 (23.9) | -        |
| Hydroxychloroquine                                                        | 764/3270 (23.4)   | 0.007    |
| No HCQ                                                                    | 538/2640 (20.4)   |          |
| After propensity score matching                                           |                   |          |
| Pre-FDA approval                                                          |                   |          |
| Hydroxychloroquine                                                        | 49/192 (25.5)     | 0.03     |
| No HCQ                                                                    | 66/384 (17.2)     |          |
| FDA approval                                                              |                   |          |
| Hydroxychloroquine                                                        | 359/1406 (25.5)   | 0.08     |
| No HCQ                                                                    | 318/1406 (22.6)   |          |
| FDA warning                                                               |                   |          |
| Hydroxychloroquine                                                        | 37/176 (21.0)     | 0.11     |
| No HCQ                                                                    | 53/352 (15.1)     |          |
| Univariate analysis - odds ratio [95% confidence interval]*               |                   |          |
| Pre-FDA approval (reference: no HCQ)                                      | 1.65 [1.09-2.51]  | 0.02     |
| FDA approval (reference: no HCQ)                                          | 1.17 [0.99-1.39]  | 0.07     |
| FDA warning (reference: no HCQ)                                           | 1.50 [0.94-2.39]  | 0.09     |
| Propensity-score matched analyses-hazard ratio [95% confidence interval]* |                   |          |
| Pre-FDA approval (reference: no HCQ)                                      | 1.70 [1.17-2.48]  | 0.005    |
| FDA approval (reference: no HCQ)                                          | 1.03 [0.88-1.20]  | 0.72     |
| FDA warning (reference: no HCQ)                                           | 1.53 [1.00-2.34]  | 0.05     |

\* Comparing hydroxychloroquine group to no treatment group

1  
2  
3  
4  
5  
6  
7  
8  
9  
10  
11  
12  
13  
14  
15  
16  
17  
18  
19  
20  
21  
22  
23  
24  
25  
26  
27  
28  
29  
30  
31  
32  
33  
34  
35  
36  
37  
38  
39  
40  
41  
42  
43  
44  
45  
46  
47

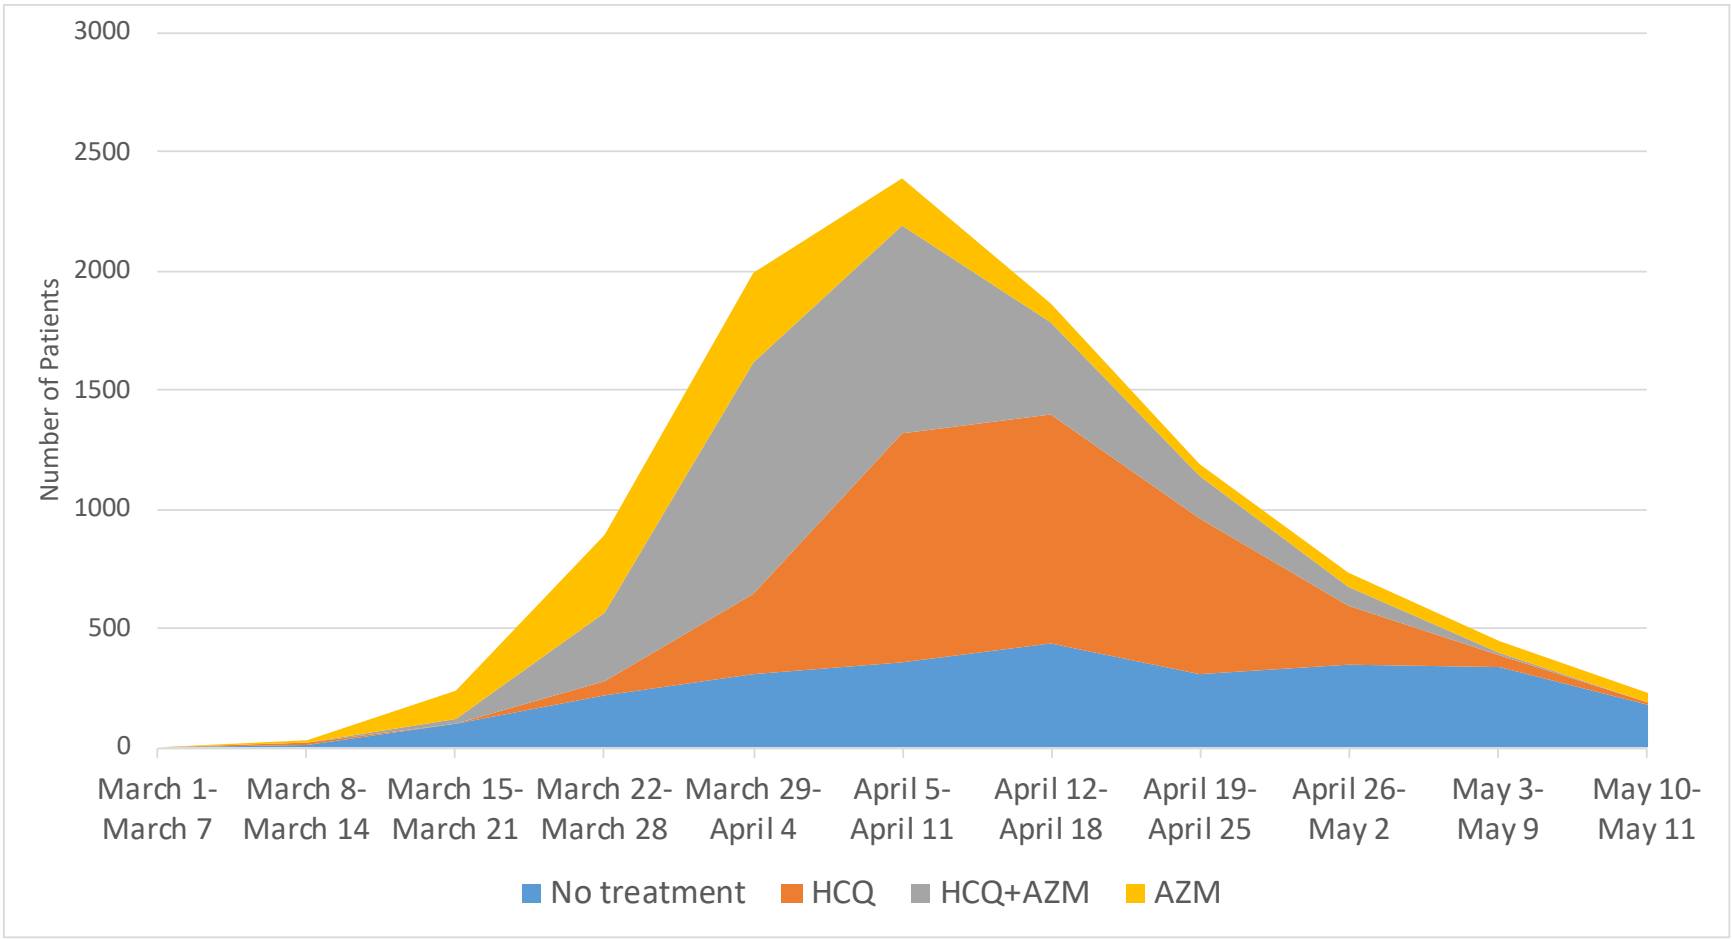

Figure 1. Trends in COVID-19 patients treated with different medications

Figure 2. Kaplan-Meier curve showing freedom from composite end point of intubation or inpatient mortality by different time period

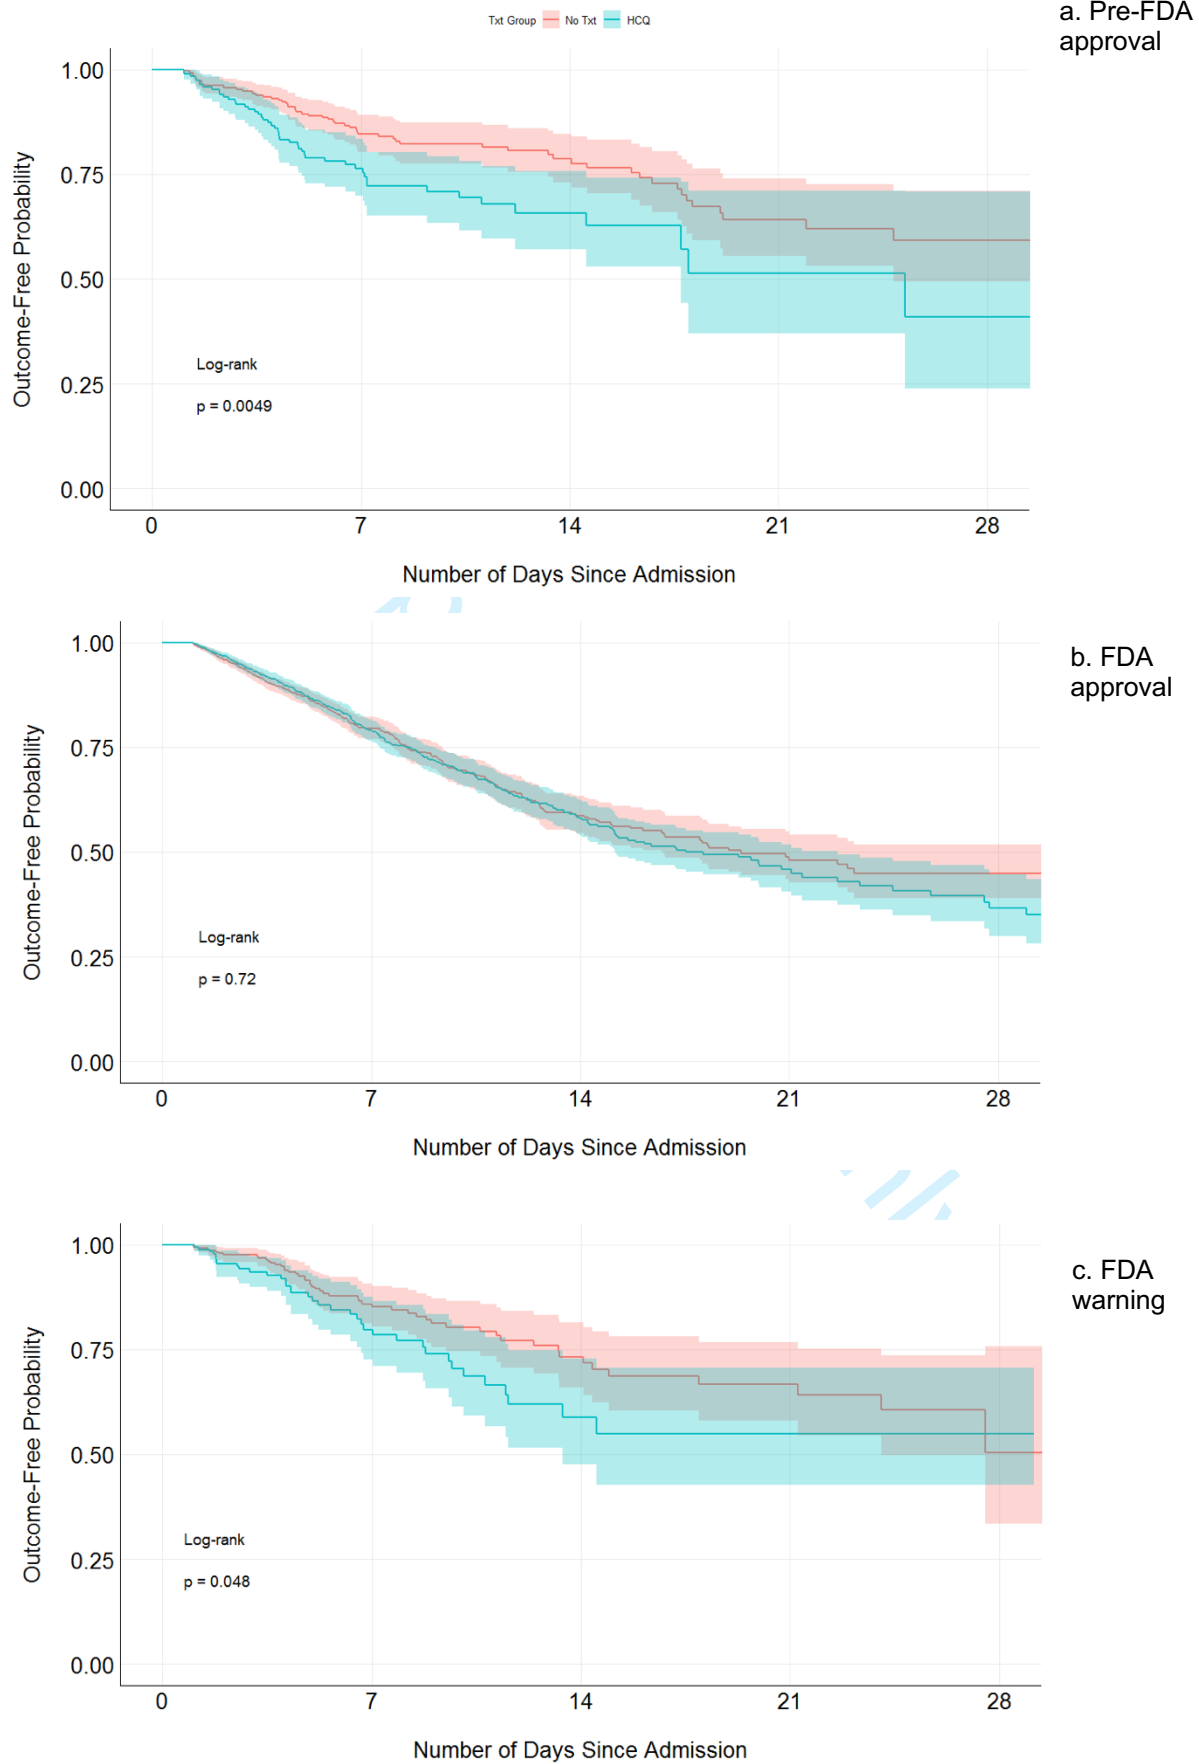

1  
2  
3  
4  
5  
6  
7  
8  
9  
10  
11  
12  
13  
14  
15  
16  
17  
18  
19  
20  
21  
22  
23  
24  
25  
26  
27  
28  
29  
30  
31  
32  
33  
34  
35  
36  
37  
38  
39  
40  
41  
42  
43  
44  
45  
46  
47  
48  
49  
50  
51  
52  
53  
54  
55  
56  
57  
58  
59  
60STROBE Statement—Checklist of items that should be included in reports of *cross-sectional studies*

|                              | Item No | Recommendation                                                                                                                                                                                                                                                                                                                                                                                                                                                     |
|------------------------------|---------|--------------------------------------------------------------------------------------------------------------------------------------------------------------------------------------------------------------------------------------------------------------------------------------------------------------------------------------------------------------------------------------------------------------------------------------------------------------------|
| <b>Title and abstract</b>    | 1       | (a) Indicate the study's design with a commonly used term in the title or the abstract<br><a href="#">Page 1</a>                                                                                                                                                                                                                                                                                                                                                   |
|                              |         | (b) Provide in the abstract an informative and balanced summary of what was done and what was found<br><a href="#">Page 2 and 3</a>                                                                                                                                                                                                                                                                                                                                |
| <b>Introduction</b>          |         |                                                                                                                                                                                                                                                                                                                                                                                                                                                                    |
| Background/rationale         | 2       | Explain the scientific background and rationale for the investigation being reported<br><a href="#">Page 5 and 6</a>                                                                                                                                                                                                                                                                                                                                               |
| Objectives                   | 3       | State specific objectives, including any prespecified hypotheses<br><a href="#">Page 6 lines 13-16</a>                                                                                                                                                                                                                                                                                                                                                             |
| <b>Methods</b>               |         |                                                                                                                                                                                                                                                                                                                                                                                                                                                                    |
| Study design                 | 4       | Present key elements of study design early in the paper<br><a href="#">Page 6 line 20</a>                                                                                                                                                                                                                                                                                                                                                                          |
| Setting                      | 5       | Describe the setting, locations, and relevant dates, including periods of recruitment, exposure, follow-up, and data collection<br><a href="#">Page 6 lines 19-Page 7 line 3, Page 7 lines 11-14, Page 8 lines 19</a>                                                                                                                                                                                                                                              |
| Participants                 | 6       | (a) Give the eligibility criteria, and the sources and methods of selection of participants<br><a href="#">Page 7 lines 10-22</a>                                                                                                                                                                                                                                                                                                                                  |
| Variables                    | 7       | Clearly define all outcomes, exposures, predictors, potential confounders, and effect modifiers. Give diagnostic criteria, if applicable<br><a href="#">Page 8 lines 4-Page 9 line 16</a>                                                                                                                                                                                                                                                                          |
| Data sources/<br>measurement | 8*      | For each variable of interest, give sources of data and details of methods of assessment (measurement). Describe comparability of assessment methods if there is more than one group<br><a href="#">Page 7 lines 5- 8</a>                                                                                                                                                                                                                                          |
| Bias                         | 9       | Describe any efforts to address potential sources of bias<br><a href="#">Page 10 lines 1-6</a>                                                                                                                                                                                                                                                                                                                                                                     |
| Study size                   | 10      | Explain how the study size was arrived at<br><a href="#">Page 7 lines 10-22</a>                                                                                                                                                                                                                                                                                                                                                                                    |
| Quantitative variables       | 11      | Explain how quantitative variables were handled in the analyses. If applicable, describe which groupings were chosen and why<br><a href="#">Page 8 line 21- Page 9 line 13</a>                                                                                                                                                                                                                                                                                     |
| Statistical methods          | 12      | (a) Describe all statistical methods, including those used to control for confounding<br><a href="#">Page 9 line 18-Page 10 line 16</a><br>(b) Describe any methods used to examine subgroups and interactions<br>(c) Explain how missing data were addressed <a href="#">Page 9 lines 12-13</a><br>(d) If applicable, describe analytical methods taking account of sampling strategy<br>(e) Describe any sensitivity analyses <a href="#">Page 8 lines 18-19</a> |
| <b>Results</b>               |         |                                                                                                                                                                                                                                                                                                                                                                                                                                                                    |
| Participants                 | 13*     | (a) Report numbers of individuals at each stage of study—eg numbers potentially eligible, examined for eligibility, confirmed eligible, included in the study, completing follow-up, and analysed <a href="#">Page 7 lines 11-15, line 22</a><br>(b) Give reasons for non-participation at each stage                                                                                                                                                              |

|                          |     |                                                                                                                                                                                                                                                                |
|--------------------------|-----|----------------------------------------------------------------------------------------------------------------------------------------------------------------------------------------------------------------------------------------------------------------|
|                          |     | (c) Consider use of a flow diagram                                                                                                                                                                                                                             |
| Descriptive data         | 14* | (a) Give characteristics of study participants (eg demographic, clinical, social) and information on exposures and potential confounders<br><a href="#">Page 10 line 20-page 12 line 14</a>                                                                    |
|                          |     | (b) Indicate number of participants with missing data for each variable of interest                                                                                                                                                                            |
| Outcome data             | 15* | Report numbers of outcome events or summary measures<br><a href="#">Page 12 lines 6-11</a>                                                                                                                                                                     |
| Main results             | 16  | (a) Give unadjusted estimates and, if applicable, confounder-adjusted estimates and their precision (eg, 95% confidence interval). Make clear which confounders were adjusted for and why they were included<br><a href="#">Page 12 lines 6-Page 13 line 2</a> |
|                          |     | (b) Report category boundaries when continuous variables were categorized                                                                                                                                                                                      |
|                          |     | (c) If relevant, consider translating estimates of relative risk into absolute risk for a meaningful time period                                                                                                                                               |
| Other analyses           | 17  | Report other analyses done—eg analyses of subgroups and interactions, and sensitivity analyses                                                                                                                                                                 |
| <b>Discussion</b>        |     |                                                                                                                                                                                                                                                                |
| Key results              | 18  | Summarise key results with reference to study objectives<br><a href="#">Page 13 lines 5-12</a>                                                                                                                                                                 |
| Limitations              | 19  | Discuss limitations of the study, taking into account sources of potential bias or imprecision. Discuss both direction and magnitude of any potential bias<br><a href="#">Page 14 line 18-Page 15 line 9</a>                                                   |
| Interpretation           | 20  | Give a cautious overall interpretation of results considering objectives, limitations, multiplicity of analyses, results from similar studies, and other relevant evidence<br><a href="#">Page 14 lines 6-17</a>                                               |
| Generalisability         | 21  | Discuss the generalisability (external validity) of the study results<br><a href="#">Page 15 lines 9-10</a>                                                                                                                                                    |
| <b>Other information</b> |     |                                                                                                                                                                                                                                                                |
| Funding                  | 22  | Give the source of funding and the role of the funders for the present study and, if applicable, for the original study on which the present article is based<br><a href="#">Page 16 lines 9-12</a>                                                            |

\*Give information separately for exposed and unexposed groups.

**Note:** An Explanation and Elaboration article discusses each checklist item and gives methodological background and published examples of transparent reporting. The STROBE checklist is best used in conjunction with this article (freely available on the Web sites of PLoS Medicine at <http://www.plosmedicine.org/>, Annals of Internal Medicine at <http://www.annals.org/>, and Epidemiology at <http://www.epidem.com/>). Information on the STROBE Initiative is available at [www.strobe-statement.org](http://www.strobe-statement.org).
